# Supplementary material for: Efficient copper-catalyzed Michael addition of acrylic derivatives with primary alcohols in the presence of base
Source: Royal Society of Chemistry journal article supplement (doi:10.1039/c2cc37595h), 2012-11-20

## Supporting Information

### Efficient copper-catalyzed Michael addition of acrylic derivatives with primary alcohols in the presence of base

Feng Wang,<sup>a</sup> Haijun Yang,<sup>b</sup> Hua Fu,<sup>b,c\*</sup> and Zhichao Pei<sup>a\*</sup>

<sup>a</sup> College of Science, Northwest A&F University, Shaanxi, 712100, P. R. China

<sup>b</sup> Key Laboratory of Bioorganic Phosphorus Chemistry and Chemical Biology (Ministry of Education), Department of Chemistry, Tsinghua University, Beijing 100084, P. R. China

<sup>c</sup> Key Laboratory of Chemical Biology (Guangdong Province) Graduate School of Shenzhen Tsinghua University, Shenzhen 518057, P. R. China

E-mail: fuhua@mail.tsinghua.edu.cn; peizhichao18@yahoo.com

#### Table of contents

|                                                                                           |     |
|-------------------------------------------------------------------------------------------|-----|
| General experimental procedures                                                           | P2  |
| General procedure for synthesis of compounds <b>1a-g</b>                                  | P2  |
| General procedure for Michael reaction conditions screening                               | P2  |
| General procedure for synthesis of compounds <b>3a-w</b>                                  | P3  |
| General procedure for synthesis of compounds <b>3x</b>                                    | P3  |
| Characterization data of compounds <b>1a-g</b> , <b>3a-x</b>                              | P3  |
| References                                                                                | P12 |
| The <sup>1</sup> H and <sup>13</sup> C NMR spectra of compounds <b>1a-g</b> , <b>3a-x</b> | P13 |

## General experimental procedures

All reactions were carried out in air except special statement. Commercially available reagents and solvents were purchased and used as received. Proton and carbon magnetic resonance spectra ( $^1\text{H}$  NMR and  $^{13}\text{C}$  NMR) were recorded on a JEOL-300 or JEOL-600 spectrometers using tetramethylsilane (TMS) in the solvent of  $\text{CDCl}_3$  as the internal standard ( $^1\text{H}$  NMR: TMS at 0.00 ppm,  $\text{CHCl}_3$  at 7.26 ppm;  $^{13}\text{C}$  NMR:  $\text{CHCl}_3$  at 77.36 ppm). Low resolution Mass spectra (LRMS) were recorded on a Bruker Esquire-2000 mass spectrometer (ESI). Melting points were measured on an uncorrected X-4 digital melting point Apparatus.

## General procedure for synthesis of compounds **1a-g**<sup>1-5</sup>

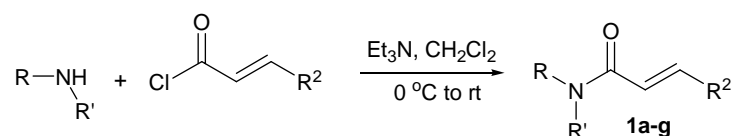

Amine (10 mmol) and triethylamine (11 mmol) were dissolved in dichloromethane (20 mL), the solution was cooled to 0 °C, and acyl chloride (11 mmol) in 5 mL dichloromethane was added dropwise to the solution over 15 min. After stirring for another 15 min, the mixture was warmed to room temperature and stirred until the amine was consumed completely (monitored by TLC). The resulting solution was concentrated, and the residue was dissolved in 20 mL of EtOAc and filtered. The organic layer was washed with 5% HCl solution (3 × 20 mL), saturated  $\text{NaHCO}_3$  solution (20 mL) and brine (20 mL), dried over anhydrous  $\text{Na}_2\text{SO}_4$ , filtered, and concentrated *in vacuo*. After purification by flash chromatography on silica gel (EtOAc in petroleum) or recrystallization, pure compounds (**1a-g**) were obtained. Compounds (**1g-j**) were purchased from Alfa Aesar Company.

## General procedure for Michael reaction conditions screening

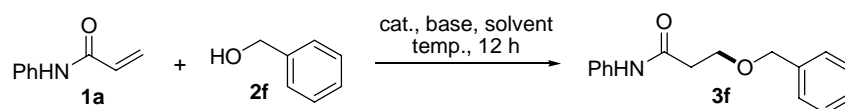

*N*-Phenylacrylamide (**1a**) (74 mg, 0.5 mmol), phenylmethanol (**2f**) (54 mg, 0.5 mmol),

base, catalyst, and 1 mL of solvent were added to a 5 mL round-bottom flask with a magnetic stir bar, and the mixture was refluxed overnight (about 12 h). The resulting solution was cooled to room temperature and flushed through a short column of silica gel with dichloromethane. The solution was concentrated by rotary evaporation, and the residue was purified by flash chromatography on silica gel (petroleum ether/acetyl acetate, 5:1) to give 3-benzoxyl-*N*-phenyl propanamide (**3f**).

#### General procedure for synthesis of compounds **3a-w**

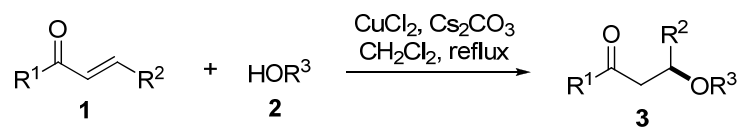

Acrylic derivative (**1**) (2.0 mmol), alcohol (**2**) (4.0 mmol), CH<sub>3</sub>ONa (216 mg, 4.0 mmol) for entry 18 in Table 2, Cs<sub>2</sub>CO<sub>3</sub> (652 mg, 2.0 mmol) for other entries in Table 2, CuCl<sub>2</sub> (27 mg, 0.2 mmol), and CH<sub>3</sub>OH (4.0 mL) for entry 18 in Table 2, dichloromethane (4.0 mL) for other entries in Table 2 were added to a 10 mL round-bottom flask with a magnetic stir bar, and the mixture was refluxed under air overnight (about 12 h) (For entry 17 in Table 2, the reaction was performed under nitrogen atmosphere). After **1** was completely consumed (monitored by TLC), the resulting solution was cooled to room temperature. For products **3a-t**, the solution was flushed through a short column of silica gel with dichloromethane and concentrated by rotary evaporation, and the residue was purified by flash chromatography on silica gel (petroleum ether/acetyl acetate) to give **3a-t**. For products **3u-w**, the solvent and other materials with low boiling point were removed by rotary evaporation, and 4 mL of 5% HCl aqueous solution was added to the residue. The aqueous solution was extracted with EtOAc (2 × 5 mL), and the combined organic layer was washed with saturated brine (2 × 5 mL) and dried over anhydrous Na<sub>2</sub>SO<sub>4</sub>. After concentrated *in vacuo*, the residue was purified by flash chromatography on silica gel (petroleum ether/acetyl acetate) to provide **3u-w**.

#### General procedure for synthesis of compound **3x**

Compound **3x** was synthesized using the same procedure as **3a-t**.

## Characterization data of compounds 1a-g

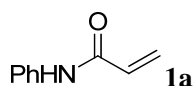

***N*-Phenylacrylamide (1a).**<sup>1,2</sup> Eluent: petroleum ether/ethyl acetate (4:1). Yield: 1.21 g (82%). White solid, mp 106-107 °C (lit.<sup>1</sup> 102-104 °C). <sup>1</sup>H NMR (CDCl<sub>3</sub>, 300 MHz): δ 8.20 (bs, 1H), 7.60-7.58 (m, 2H), 7.32-7.26 (m, 2H), 7.13-7.08 (m, 1H), 6.44-6.26 (m, 2H), 5.70 (dd, *J* = 9.6, 1.7 Hz, 1H). <sup>13</sup>C NMR (CDCl<sub>3</sub>, 75 MHz): δ 164.3, 138.1, 131.6, 129.3, 127.9, 124.8, 120.6. ESIMS: [M+H]<sup>+</sup> *m/z* 148.3, [M+Na]<sup>+</sup> *m/z* 170.2.

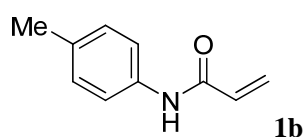

***N*-*p*-Tolylacrylamide (1b).**<sup>1</sup> Eluent: petroleum ether/ethyl acetate (2:1). Yield: 1.19 g (74%). White solid, mp 145-146 °C (lit.<sup>1</sup> 138-139 °C). <sup>1</sup>H NMR (CDCl<sub>3</sub>, 600 MHz): δ 7.94 (bs, 1H), 7.46 (d, *J* = 8.3 Hz, 2H), 7.10 (d, *J* = 6.9 Hz, 2H), 6.40-6.37 (m, 1H), 6.30-6.25 (m, 1H), 5.69 (d, *J* = 8.9 Hz, 1H), 2.30 (s, 3H). <sup>13</sup>C NMR (CDCl<sub>3</sub>, 150 MHz): δ 164.0, 135.6, 134.5, 131.7, 129.8, 127.6, 120.6, 21.2. ESIMS: [M+H]<sup>+</sup> *m/z* 162.3, [M+Na]<sup>+</sup> *m/z* 184.2.

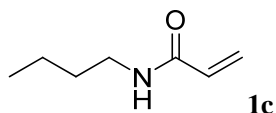

***N*-Butylacrylamide (1c).**<sup>1</sup> Eluent: petroleum ether/ethyl acetate (3:1). Yield: 1.11 g (87%). Oil. <sup>1</sup>H NMR (CDCl<sub>3</sub>, 600 MHz): δ 6.27-6.13 (m, 3H), 5.70 (d, *J* = 10.3 Hz, 1H), 3.32 (t, *J* = 6.9 Hz, 2H), 1.52-1.50 (m, 2H), 1.37-1.36 (m, 2H), 0.93 (t, *J* = 5.6 Hz, 3H). <sup>13</sup>C NMR (CDCl<sub>3</sub>, 150 MHz): δ 166.0, 131.4, 126.1, 39.6, 31.9, 20.4, 14.0. ESIMS: [M+H]<sup>+</sup> *m/z* 128.4, [M+Na]<sup>+</sup> *m/z* 150.2.

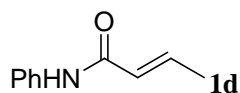

**(*E*)-*N*-Phenylbut-2-enamide (1d).**<sup>3,4</sup> Eluent: petroleum ether/ethyl acetate (5:1). Yield: 1.45 g (90%). White solid, mp 113-114 °C (lit.<sup>3</sup> 113-115 °C). <sup>1</sup>H NMR (CDCl<sub>3</sub>, 600 MHz): δ 7.94 (bs, 1H), 7.59-7.57 (m, 2H), 7.31-7.26 (m, 2H), 7.10-7.08 (m, 1H), 7.02-6.90 (m, 1H), 6.00 (d, *J* = 15.1 Hz, 1H), 1.84 (dd, *J* = 6.9, 1.4 Hz, 3H). <sup>13</sup>C NMR

(CDCl<sub>3</sub>, 150 MHz):  $\delta$  164.7, 141.7, 138.4, 129.2, 125.9, 124.5, 120.5, 18.1. ESIMS: [M+H]<sup>+</sup> m/z 162.3, [M+Na]<sup>+</sup> m/z 184.2.

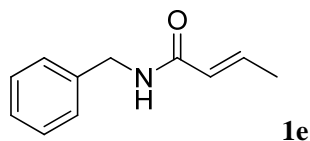

**(E)-N-Benzylbut-2-enamide (1e).**<sup>5</sup> Recrystallization: petroleum ether/ethyl acetate (8:1). Yield: 1.33 mg (76%). White solid, mp 118-119 °C. <sup>1</sup>H NMR (CDCl<sub>3</sub>, 600 MHz):  $\delta$  7.31-7.26 (m, 5H), 6.88-6.80 (m, 1H), 6.03 (bs, 1H), 5.82 (d,  $J$  = 15.1 Hz, 3H), 4.47-4.46 (m, 2H), 1.83 (d,  $J$  = 6.2 Hz, 3H). <sup>13</sup>C NMR (CDCl<sub>3</sub>, 150 MHz):  $\delta$  166.2, 140.5, 138.7, 129.0, 128.1, 127.7, 125.2, 43.8, 18.0. ESIMS: [M+H]<sup>+</sup> m/z 176.3, [M+Na]<sup>+</sup> m/z 198.2.

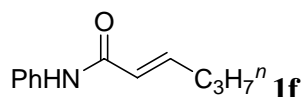

**(E)-N-Phenylhex-2-enamide (1f).** Eluent: petroleum ether/ethyl acetate (5:1). Yield: 0.86 g (45%). White solid, mp 106-107 °C. <sup>1</sup>H NMR (CDCl<sub>3</sub>, 300 MHz):  $\delta$  8.23 (bs, 1H), 7.61-7.53 (m, 2H), 7.30-7.24 (m, 2H), 7.09-7.03 (m, 1H), 7.00-6.87 (m, 1H), 6.00 (dt,  $J$  = 15.1, 1.4 Hz, 1H), 2.17-2.09 (m, 2H), 1.50-1.37 (m, 2H), 0.90 (t,  $J$  = 7.6 Hz, 3H). <sup>13</sup>C NMR (CDCl<sub>3</sub>, 75 MHz):  $\delta$  165.0, 146.4, 138.5, 129.2, 124.4, 120.5, 34.4, 21.7, 14.0. ESIMS: [M+H]<sup>+</sup> m/z 190.3, [M+Na]<sup>+</sup> m/z 212.2.

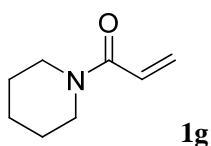

**N-Acrylpiperidine (1g).**<sup>1</sup> Eluent: petroleum ether/ethyl acetate (2:1). Yield: 0.72 g (52%). Pale yellow oil. <sup>1</sup>H NMR (CDCl<sub>3</sub>, 300 MHz):  $\delta$  6.59 (dd,  $J$  = 16.9, 10.7 Hz, 1H), 6.24 (dd,  $J$  = 16.9, 2.1 Hz, 1H), 5.65 (dd,  $J$  = 10.7, 2.1 Hz, 1H), 3.61-3.49 (m, 4H), 1.67-1.58 (m, 6H). <sup>13</sup>C NMR (CDCl<sub>3</sub>, 75 MHz):  $\delta$  165.4, 128.2, 127.0, 46.9, 43.1, 26.7, 25.6, 24.6. ESIMS: [M+H]<sup>+</sup> m/z 140.4, [M+Na]<sup>+</sup> m/z 162.3.

#### Characterization data of compounds 3a-w

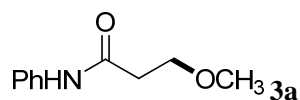

**3-Methoxy-*N*-phenylpropanamide (3a).** Eluent: petroleum ether/ethyl acetate (5:1). Yield: 319 mg (89%). Colorless oil.  $^1\text{H}$  NMR ( $\text{CDCl}_3$ , 300 MHz):  $\delta$  8.41 (bs, 1H), 7.53-7.50 (m, 2H), 7.31-7.26 (m, 2H), 7.10-7.07 (m, 1H), 3.71 (t,  $J = 5.7$  Hz, 2H), 3.41 (s, 3H), 2.61 (t,  $J = 5.5$  Hz, 2H).  $^{13}\text{C}$  NMR ( $\text{CDCl}_3$ , 75 MHz):  $\delta$  170.2, 138.3, 129.2, 124.4, 120.2, 68.9, 59.1, 38.2. ESIMS:  $[\text{M}+\text{H}]^+$   $m/z$  180.3,  $[\text{M}+\text{Na}]^+$   $m/z$  202.2.

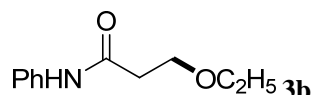

**3-Ethoxy-*N*-phenylpropanamide (3b).** Eluent: petroleum ether/ethyl acetate (5:1). Yield: 340 mg (88%). Colorless oil.  $^1\text{H}$  NMR ( $\text{CDCl}_3$ , 300 MHz):  $\delta$  8.51 (bs, 1H), 7.52-7.49 (m, 2H), 7.33-7.26 (m, 2H), 7.11-7.06 (m, 1H), 3.76 (t,  $J = 5.5$  Hz, 2H), 3.60 (q,  $J = 6.7$  Hz, 2H), 2.63 (t,  $J = 5.5$  Hz, 2H), 1.28 (t,  $J = 6.7$  Hz, 3H).  $^{13}\text{C}$  NMR ( $\text{CDCl}_3$ , 75 MHz):  $\delta$  170.3, 138.5, 129.3, 124.3, 120.0, 67.0, 66.8, 38.3, 15.5. ESIMS:  $[\text{M}+\text{Na}]^+$   $m/z$  216.2.

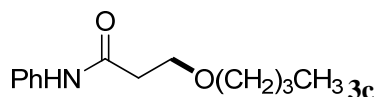

**3-Butoxy-*N*-phenylpropanamide (3c).** Eluent: petroleum ether/ethyl acetate (5:1). Yield: 256 mg (58%). Colorless oil.  $^1\text{H}$  NMR ( $\text{CDCl}_3$ , 300 MHz):  $\delta$  8.53 (bs, 1H), 7.52-7.49 (m, 2H), 7.33-7.26 (m, 2H), 7.11-7.06 (m, 1H), 3.75 (t,  $J = 5.5$  Hz, 2H), 3.53 (t,  $J = 6.5$  Hz, 2H), 2.63 (t,  $J = 5.5$  Hz, 2H), 1.68-1.59 (m, 2H), 1.49-1.39 (m, 2H), 0.95 (t,  $J = 7.4$  Hz, 3H).  $^{13}\text{C}$  NMR ( $\text{CDCl}_3$ , 75 MHz):  $\delta$  170.4, 138.5, 129.3, 124.3, 120.1, 76.9, 67.0, 38.3, 32.0, 19.7, 14.2. ESIMS:  $[\text{M}+\text{H}]^+$   $m/z$  222.2.

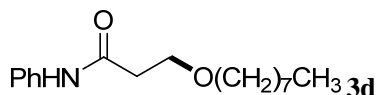

**3-(Octyloxy)-*N*-phenylpropanamide (3d).** Eluent: petroleum ether/ethyl acetate (5:1). Yield: 205 mg (37%). White solid, mp 37-38 °C.  $^1\text{H}$  NMR ( $\text{CDCl}_3$ , 600 MHz):  $\delta$  8.52 (bs, 1H), 7.51-7.50 (m, 2H), 7.31-7.29 (m, 2H), 7.09-7.06 (m, 1H), 3.75 (t,  $J = 5.5$  Hz, 2H), 3.52 (t,  $J = 6.5$  Hz, 2H), 2.63 (t,  $J = 5.5$  Hz, 2H), 1.65-1.62 (m, 2H), 1.40-1.37 (m, 2H), 1.31-1.26 (m, 8H), 0.88 (t,  $J = 6.9$  Hz, 3H).  $^{13}\text{C}$  NMR ( $\text{CDCl}_3$ , 150 MHz):  $\delta$  170.4, 138.5, 129.2, 124.3, 120.1, 71.8, 67.0, 38.4, 32.1, 30.0, 29.7, 29.6, 26.6, 23.0, 14.4. ESIMS:  $[\text{M}+\text{H}]^+$   $m/z$  278.2,  $[\text{M}+\text{Na}]^+$   $m/z$  300.2.

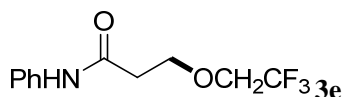

**N-Phenyl-3-(2,2,2-trifluoroethoxy)propanamide (3e).** Eluent: petroleum ether/ethyl acetate (3:1). Yield: 425 mg (86%). White solid, mp 74-75 °C.  $^1\text{H}$  NMR ( $\text{CDCl}_3$ , 300 MHz):  $\delta$  7.86 (bs, 1H), 7.54-7.49 (m, 2H), 7.34-7.26 (m, 2H), 7.13-7.08 (m, 1H), 3.99-3.86 (m, 4H), 2.67 (t,  $J = 5.7$  Hz, 2H).  $^{13}\text{C}$  NMR ( $\text{CDCl}_3$ , 75 MHz):  $\delta$  169.2, 138.1, 129.3, 124.7, 124.1 (q,  $J = 279.6$  Hz), 120.3, 69.0, 68.9 (q,  $J = 34.7$  Hz), 38.3. ESIMS:  $[\text{M}+\text{H}]^+$   $m/z$  248.3,  $[\text{M}+\text{Na}]^+$   $m/z$  270.1.

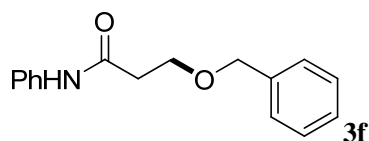

**3-(Benzyloxy)-N-phenylpropanamide (3f).** Eluent: petroleum ether/ethyl acetate (4:1). Yield: 418 mg (82%). Oil.  $^1\text{H}$  NMR ( $\text{CDCl}_3$ , 300 MHz):  $\delta$  8.32 (bs, 1H), 7.45-7.42 (m, 2H), 7.35-7.25 (m, 7H), 7.10-7.05 (m, 1H), 4.59 (s, 2H), 3.83 (t,  $J = 5.5$  Hz, 2H), 2.66 (t,  $J = 5.5$  Hz, 2H).  $^{13}\text{C}$  NMR ( $\text{CDCl}_3$ , 75 MHz):  $\delta$  170.1, 138.4, 137.7, 129.2, 129.0, 128.4, 128.2, 124.4, 120.1, 73.9, 66.7, 38.4. ESIMS:  $[\text{M}+\text{H}]^+$   $m/z$  256.3,  $[\text{M}+\text{Na}]^+$   $m/z$  278.2.

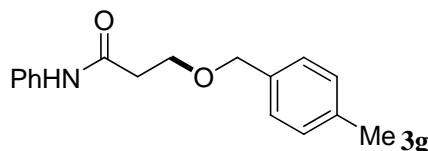

**3-(4-Methylbenzyloxy)-N-phenylpropanamide (3g).** Eluent: petroleum ether/ethyl acetate (3:1). Yield: 409 mg (76%). White solid, mp 86-87 °C.  $^1\text{H}$  NMR ( $\text{CDCl}_3$ , 300 MHz):  $\delta$  8.33 (bs, 1H), 7.45-7.42 (m, 2H), 7.31-7.16 (m, 6H), 7.09-7.05 (m, 1H), 4.56 (s, 2H), 3.82 (t,  $J = 5.7$  Hz, 2H), 2.65 (t,  $J = 5.7$  Hz, 2H), 2.36 (s, 3H).  $^{13}\text{C}$  NMR ( $\text{CDCl}_3$ , 75 MHz):  $\delta$  170.1, 138.4, 138.3, 134.6, 129.7, 129.2, 128.4, 124.3, 120.0, 73.8, 66.5, 38.5, 21.5. ESIMS:  $[\text{M}+\text{H}]^+$   $m/z$  270.4,  $[\text{M}+\text{Na}]^+$   $m/z$  292.2.

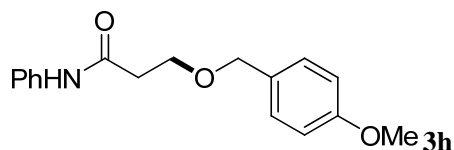

**3-(4-Methoxybenzyloxy)-N-phenylpropanamide (3h).** Eluent: petroleum ether/ethyl acetate (3:1). Yield: 353 mg (62%). White solid, mp 81-82 °C.  $^1\text{H}$  NMR ( $\text{CDCl}_3$ , 300

MHz):  $\delta$  8.37 (bs, 1H), 7.45-7.42 (m, 2H), 7.31-7.25 (m, 4H), 7.09-7.05 (m, 1H), 6.89 (d,  $J$  = 8.6 Hz, 2H), 4.52 (s, 2H), 3.82-3.78 (m, 5H), 2.64 (t,  $J$  = 5.7 Hz, 2H).  $^{13}\text{C}$  NMR ( $\text{CDCl}_3$ , 75 MHz):  $\delta$  170.1, 159.8, 138.4, 129.9, 129.2, 128.9, 124.3, 120.0, 114.3, 73.5, 66.4, 55.6, 38.4. ESIMS:  $[\text{M}+\text{Na}]^+$   $m/z$  308.2.

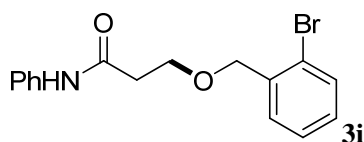

**3-(2-Bromobenzyloxy)-N-phenylpropanamide (3i).** Eluent: petroleum ether/ethyl acetate (3:1). Yield: 400 mg (60%). White solid, mp 68-69 °C.  $^1\text{H}$  NMR ( $\text{CDCl}_3$ , 600 MHz):  $\delta$  8.36 (bs, 1H), 7.55 (d,  $J$  = 7.6 Hz, 1H), 7.47-7.43 (m, 3H), 7.30-7.25 (m, 3H), 7.08-7.05 (m, 1H), 4.64 (s, 2H), 3.88 (t,  $J$  = 5.2 Hz, 2H), 2.68 (t,  $J$  = 5.7 Hz, 2H).  $^{13}\text{C}$  NMR ( $\text{CDCl}_3$ , 150 MHz):  $\delta$  170.0, 138.4, 137.1, 133.1, 129.9, 129.8, 129.2, 127.9, 124.4, 123.5, 120.4, 73.1, 67.1, 38.5. ESIMS:  $[\text{M}+\text{H}]^+$   $m/z$  334.3, 336.2,  $[\text{M}+\text{Na}]^+$   $m/z$  356.2, 358.0.

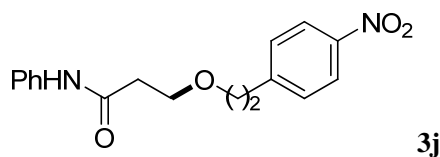

**3-(4-Nitrophenethoxy)-N-phenylpropanamide (3j).** Gradient eluent: petroleum ether/ethyl acetate (4:1 to 1:1). Yield: 427 mg (68%). Pale yellow solid, mp 134-135 °C.  $^1\text{H}$  NMR ( $\text{CDCl}_3$ , 300 MHz):  $\delta$  8.06 (dd,  $J$  = 2.0 Hz, 8.6 Hz, 2H), 7.87 (bs, 1H), 7.37 (d,  $J$  = 8.6 Hz, 2H), 3.82-3.77 (m, 4H), 3.02 (t,  $J$  = 6.3 Hz, 2H), 2.59 (t,  $J$  = 5.7 Hz, 2H).  $^{13}\text{C}$  NMR ( $\text{CDCl}_3$ , 75 MHz):  $\delta$  169.8, 147.0, 138.1, 129.9, 129.2, 124.7, 124.0, 120.1, 71.2, 67.3, 38.4, 36.3. ESIMS:  $[\text{M}+\text{H}]^+$   $m/z$  315.3,  $[\text{M}+\text{Na}]^+$   $m/z$  337.0.

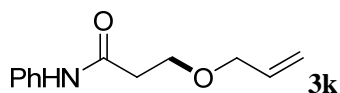

**3-(Allyloxy)-N-phenylpropanamide (3k).** Eluent: petroleum ether/ethyl acetate (4:1). Yield: 320 mg (78%). Colorless oil.  $^1\text{H}$  NMR ( $\text{CDCl}_3$ , 300 MHz):  $\delta$  8.40 (bs, 1H), 7.52-7.49 (m, 2H), 7.33-7.26 (m, 2H), 7.11-7.06 (m, 1H), 6.01-5.89 (m, 1H), 5.36-5.23 (m, 2H), 4.07 (d,  $J$  = 5.5 Hz, 2H), 3.78 (t,  $J$  = 5.7 Hz, 2H), 2.65 (t,  $J$  = 5.7 Hz, 2H).  $^{13}\text{C}$  NMR ( $\text{CDCl}_3$ , 75 MHz):  $\delta$  170.1, 138.4, 134.2, 129.2, 124.4, 120.1,



118.0, 72.4, 66.5, 38.3. ESIMS:  $[M+H]^+$   $m/z$  206.3,  $[M+Na]^+$   $m/z$  228.1.

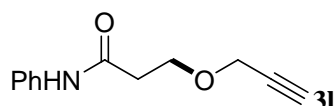

**N-Phenyl-3-(prop-2-ynyloxy)propanamide (3l).** Eluent: petroleum ether/ethyl acetate (4:1). Yield: 284 mg (70%). Colorless oil.  $^1H$  NMR ( $CDCl_3$ , 300 MHz):  $\delta$  8.13 (bs, 1H), 7.54-7.51 (m, 2H), 7.33-7.26 (m, 2H), 7.11-7.07 (m, 1H), 4.23 (d,  $J$  = 2.4 Hz, 2H), 3.88 (t,  $J$  = 5.7 Hz, 2H), 2.66 (t,  $J$  = 5.7 Hz, 2H), 2.49 (t,  $J$  = 2.4 Hz, 1H).  $^{13}C$  NMR ( $CDCl_3$ , 75 MHz):  $\delta$  169.7, 138.3, 129.2, 124.5, 120.2, 79.3, 75.6, 66.3, 58.8, 38.2. ESIMS:  $[M+H]^+$   $m/z$  204.3,  $[M+Na]^+$   $m/z$  226.1.

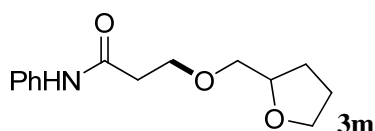

**N-Phenyl-3-((tetrahydrofuran-2-yl)methoxy)propanamide (3m).** Eluent: petroleum ether/ethyl acetate (2:1). Yield: 364 mg (73%). Colorless oil.  $^1H$  NMR ( $CDCl_3$ , 300 MHz):  $\delta$  8.73 (bs, 1H), 7.59-7.57 (m, 2H), 7.32-7.27 (m, 2H), 7.09-7.04 (m, 1H), 4.16-4.09 (m, 1H), 3.93-3.74 (m, 4H), 3.64-3.59 (m, 1H), 3.49-3.43 (m, 1H), 2.65 (t,  $J$  = 5.7 Hz, 2H), 2.04-1.86 (m, 3H), 1.64-1.55 (m, 1H).  $^{13}C$  NMR ( $CDCl_3$ , 75 MHz):  $\delta$  170.4, 138.7, 129.1, 124.1, 120.2, 77.9, 74.0, 68.5, 67.5, 38.2, 28.1, 26.0. ESIMS:  $[M+H]^+$   $m/z$  250.3,  $[M+Na]^+$   $m/z$  272.2.

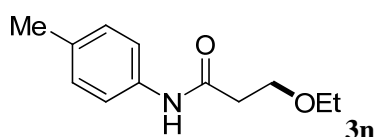

**3-Ethoxy-N-p-tolylpropanamide (3n).** Eluent: petroleum ether/ethyl acetate (5:1). Yield: 248 mg (60%). White solid, mp 65-67 °C.  $^1H$  NMR ( $CDCl_3$ , 300 MHz):  $\delta$  8.41 (bs, 1H), 7.39 (d,  $J$  = 8.6 Hz, 2H), 7.10 (d,  $J$  = 8.3 Hz, 2H), 3.75 (t,  $J$  = 5.7 Hz, 2H), 3.59 (q,  $J$  = 6.8 Hz, 2H), 2.61 (t,  $J$  = 5.5 Hz, 2H), 2.30 (s, 3H), 1.27 (t,  $J$  = 6.8 Hz, 3H).  $^{13}C$  NMR ( $CDCl_3$ , 75 MHz):  $\delta$  170.1, 135.9, 133.9, 129.7, 120.1, 66.9, 66.8, 38.3, 21.1, 15.5. ESIMS:  $[M+H]^+$   $m/z$  208.3,  $[M+Na]^+$   $m/z$  230.2.

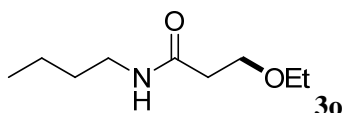

**N-Butyl-3-ethoxypropanamide (3o).** Eluent: petroleum ether/ethyl acetate (5:1). Yield: 291 mg (84%). Colorless oil.  $^1\text{H}$  NMR ( $\text{CDCl}_3$ , 300 MHz):  $\delta$  6.38 (bs, 1H), 3.67 (t,  $J = 5.7$  Hz, 2H), 3.52 (q,  $J = 7.2$  Hz, 2H), 3.25 (q,  $J = 5.9$  Hz, 2H), 2.45 (t,  $J = 5.7$  Hz, 2H), 1.54-1.41 (m, 2H), 1.39-1.29 (m, 2H), 1.21 (t,  $J = 6.9$  Hz, 3H), 0.93 (t,  $J = 7.2$  Hz, 3H).  $^{13}\text{C}$  NMR ( $\text{CDCl}_3$ , 75 MHz):  $\delta$  171.6, 66.7, 66.5, 39.1, 37.2, 31.7, 20.1, 15.1, 13.8. ESIMS:  $[\text{M}+\text{H}]^+$   $m/z$  174.3,  $[\text{M}+\text{Na}]^+$   $m/z$  196.2.

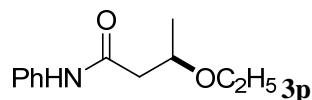

**3-Ethoxy-N-phenylbutanamide (3p).** Eluent: petroleum ether/ethyl acetate (5:1). Yield: 344 mg (83%). Colorless oil.  $^1\text{H}$  NMR ( $\text{CDCl}_3$ , 300 MHz):  $\delta$  8.64 (bs, 1H), 7.52-7.50 (m, 2H), 7.33-7.26 (m, 2H), 7.09-7.05 (m, 1H), 3.91-3.85 (m, 1H), 3.73-3.63 (m, 1H), 3.53-3.43 (m, 1H), 2.52 (d,  $J = 5.5$  Hz, 2H), 1.31-1.19 (m, 6H).  $^{13}\text{C}$  NMR ( $\text{CDCl}_3$ , 75 MHz):  $\delta$  169.9, 138.5, 129.2, 124.2, 119.9, 72.7, 64.3, 44.9, 19.8, 15.9. ESIMS:  $[\text{M}+\text{Na}]^+$   $m/z$  230.2.

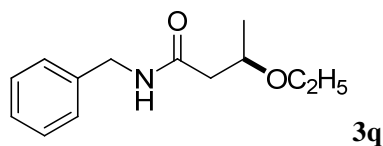

**N-Benzyl-3-ethoxybutanamide (3q).** Eluent: petroleum ether/ethyl acetate (5:1). Yield: 309 mg (70%, under nitrogen atmosphere). Colorless oil.  $^1\text{H}$  NMR ( $\text{CDCl}_3$ , 600 MHz):  $\delta$  7.34-7.31 (m, 2H), 7.29-7.25 (m, 3H), 6.69 (bs, 1H), 4.49 (dd,  $J = 14.8$ , 5.5 Hz, 1H), 4.40 (dd,  $J = 14.8$ , 5.5 Hz, 1H), 3.84-3.80 (m, 1H), 3.61-3.56 (m, 1H), 3.39-3.34 (m, 1H), 2.39 (d,  $J = 5.5$  Hz, 2H), 1.20 (d,  $J = 6.2$  Hz, 3H), 1.09 (t,  $J = 6.9$  Hz, 3H).  $^{13}\text{C}$  NMR ( $\text{CDCl}_3$ , 150 MHz):  $\delta$  171.4, 138.8, 128.9, 128.0, 127.7, 72.7, 64.2, 44.2, 43.7, 19.9, 15.7. ESIMS:  $[\text{M}+\text{H}]^+$   $m/z$  222.2.

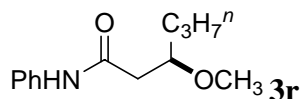

**3-Methoxy-N-phenylhexanamide (3r).** Eluent: petroleum ether/ethyl acetate (8:1). Yield: 341 mg (77%). Oil.  $^1\text{H}$  NMR ( $\text{CDCl}_3$ , 300 MHz):  $\delta$  8.39 (bs, 1H), 7.53-7.50 (m, 2H), 7.33-7.27 (m, 2H), 7.10-7.05 (m, 1H), 3.65-3.60 (m, 1H), 3.43 (s, 3H), 2.62-2.44 (m, 2H), 1.65-1.32 (m, 4H), 0.93 (t,  $J = 7.2$  Hz, 3H).  $^{13}\text{C}$  NMR ( $\text{CDCl}_3$ , 75 MHz):  $\delta$

169.9, 138.4, 129.2, 124.3, 120.1, 78.5, 57.1, 42.1, 35.7, 18.6, 14.4. ESIMS:  $[M+H]^+$   $m/z$  222.3,  $[M+Na]^+$   $m/z$  244.2.

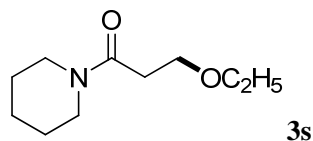

**3-Ethoxy-1-(piperidin-1-yl)propan-1-one (3s).** Eluent: petroleum ether/ethyl acetate (4:1). Yield: 178 mg (48%). Colorless oil.  $^1H$  NMR ( $CDCl_3$ , 300 MHz):  $\delta$  3.74 (t,  $J$  = 6.9 Hz, 2H), 3.57-3.48 (m, 4H), 3.42 (t,  $J$  = 5.3 Hz, 2H), 2.62 (t,  $J$  = 6.9 Hz, 2H), 1.64-1.49 (m, 6H), 1.19 (t,  $J$  = 6.9 Hz, 3H).  $^{13}C$  NMR ( $CDCl_3$ , 75 MHz):  $\delta$  169.5, 67.1, 66.7, 47.0, 42.9, 34.0, 26.7, 25.8, 24.8, 15.5. ESIMS:  $[M+H]^+$   $m/z$  186.2,  $[M+Na]^+$   $m/z$  208.2.

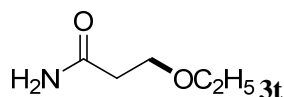

**3-Ethoxypropanamide (3t).** Eluent: petroleum ether/ethyl acetate (1:4). Yield: 220 mg (94%). Colorless oil.  $^1H$  NMR ( $CDCl_3$ , 300 MHz):  $\delta$  6.43 (bs, 1H), 5.97 (bs, 1H), 3.68 (t,  $J$  = 5.8 Hz, 2H), 3.54 (q,  $J$  = 6.9 Hz, 2H), 2.49 (t,  $J$  = 5.8 Hz, 2H), 1.22 (t,  $J$  = 6.9 Hz, 3H).  $^{13}C$  NMR ( $CDCl_3$ , 75 MHz):  $\delta$  174.7, 66.8, 66.6, 36.9, 15.3. ESIMS:  $[M+H]^+$   $m/z$  118.4,  $[M+Na]^+$   $m/z$  140.3.

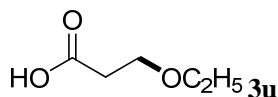

**3-Ethoxypropanoic acid (3u).** Eluent: petroleum ether/ethyl acetate (1:1). Yield: 201 mg (85%). Colorless oil.  $^1H$  NMR ( $CDCl_3$ , 300 MHz):  $\delta$  10.46 (bs, 1H), 3.71 (t,  $J$  = 5.8 Hz, 2H), 3.54 (q,  $J$  = 6.9 Hz, 2H), 2.63 (t,  $J$  = 5.8 Hz, 2H), 1.21 (t,  $J$  = 6.9 Hz, 3H).  $^{13}C$  NMR ( $CDCl_3$ , 75 MHz):  $\delta$  177.5, 66.6, 65.5, 35.0, 15.0. ESIMS:  $[M+Na]^+$   $m/z$  141.3.

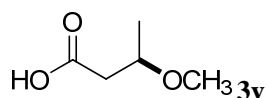

**3-Methoxybutanoic acid (3v).** Eluent: petroleum ether/ethyl acetate (3:1). Yield: 177 mg (75%). Colorless oil.  $^1H$  NMR ( $CDCl_3$ , 300 MHz):  $\delta$  10.22 (bs, 1H), 3.80-3.76 (m, 1H), 3.37 (s, 3H), 1.61 (dd,  $J$  = 15.5, 7.2 Hz, 1H), 1.61 (dd,  $J$  = 15.5, 5.5 Hz, 1H),

1.24 (d,  $J = 5.9$  Hz, 3H).  $^{13}\text{C}$  NMR ( $\text{CDCl}_3$ , 300 MHz):  $\delta$  177.0, 73.5, 56.4, 41.5, 19.1. ESIMS:  $[\text{M}+\text{H}]^+ m/z$  119.6,  $[\text{M}+\text{Na}]^+ m/z$  141.4.

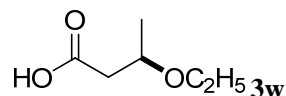

**3-Ethoxybutanoic acid (3w).** Eluent: petroleum ether/ethyl acetate (3:1). Yield: 193 mg (73%). Colorless oil.  $^1\text{H}$  NMR ( $\text{CDCl}_3$ , 600 MHz):  $\delta$  8.37 (bs, 1H), 3.90-3.87 (m, 1H), 3.61-3.58 (m, 1H), 3.51-3.46 (m, 1H), 2.61 (dd,  $J = 15.5$ , 6.9 Hz, 1H), 2.46 (dd,  $J = 15.8$ , 5.5 Hz, 1H), 1.24 (d,  $J = 6.2$  Hz, 3H), 1.20 (t,  $J = 6.9$  Hz, 3H).  $^{13}\text{C}$  NMR ( $\text{CDCl}_3$ , 150 MHz):  $\delta$  176.7, 72.0, 64.5, 42.0, 20.1, 15.7. ESIMS:  $[\text{M}+\text{H}]^+ m/z$  133.3,  $[\text{M}+\text{Na}]^+ m/z$  155.2.

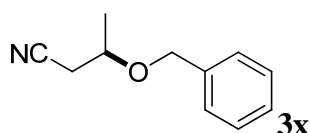

**3-(Benzyloxy)butanenitrile (3x).**<sup>6</sup> Eluent: petroleum ether/ethyl acetate (25:1). Yield: 336 mg (96%). Colorless oil.  $^1\text{H}$  NMR ( $\text{CDCl}_3$ , 300 MHz):  $\delta$  7.36-7.24 (m, 5H), 4.62-4.51 (m, 2H), 3.87-3.77 (m, 1H), 2.52 (d,  $J = 5.9$  Hz, 2H), 1.34 (d,  $J = 6.2$  Hz, 3H).  $^{13}\text{C}$  NMR ( $\text{CDCl}_3$ , 75 MHz):  $\delta$  137.9, 128.8, 128.2, 127.9, 117.8, 71.3, 70.7, 25.3, 19.9. ESIMS:  $[\text{M}+\text{Na}]^+ m/z$  198.3.

## References

- 1 S. R. Sheng, X. C. Wang, X. L. Liu, C. S. Song. *Synth. Commun.*, 2003, **33**, 2867-2872.
- 2 R. J. Cvetovich, L. DiMichele. *Org. Process Res. Dev.*, 2006, **10**, 944-946.
- 3 A. Khalafi-Nezhad, A. Parhami, M. N. S. Rad, A. Zarea. *Tetrahedron Lett.*, 2005, **46**, 6879-6882.
- 4 M. R. Jeddeloh, J. B. Holden, D. H. Nouri, M. J. Kurth. *J. Comb. Chem.*, 2007, **9**, 1041-1045.
- 5 R. Shintani, T. Kimura, T. Hayashi. *Chem. Commun.*, **2005**, 3213-3214.
- 6 D. Y. Ma, D. X. Wang, J. Pan, Z. T. Huang, M. X. Wang. *J. Org. Chem.*, **2008**, **73**, 4087-4091.

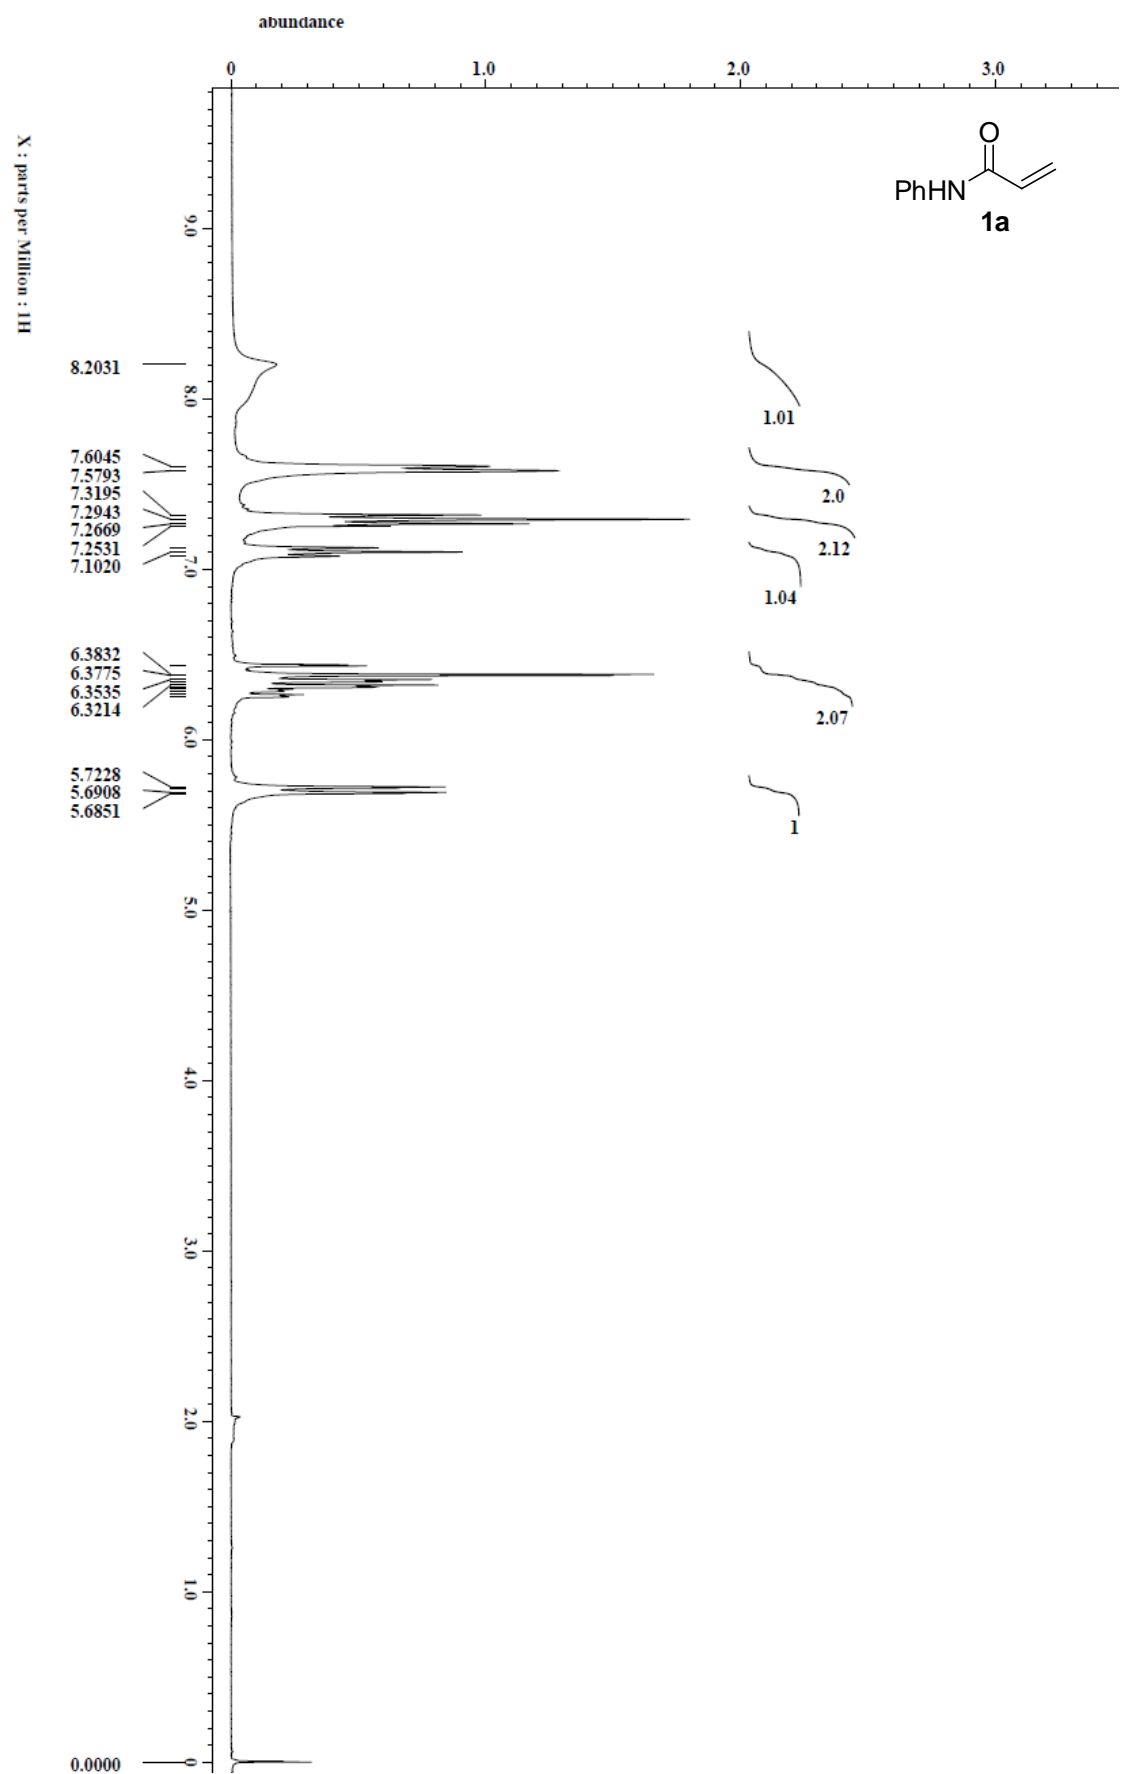

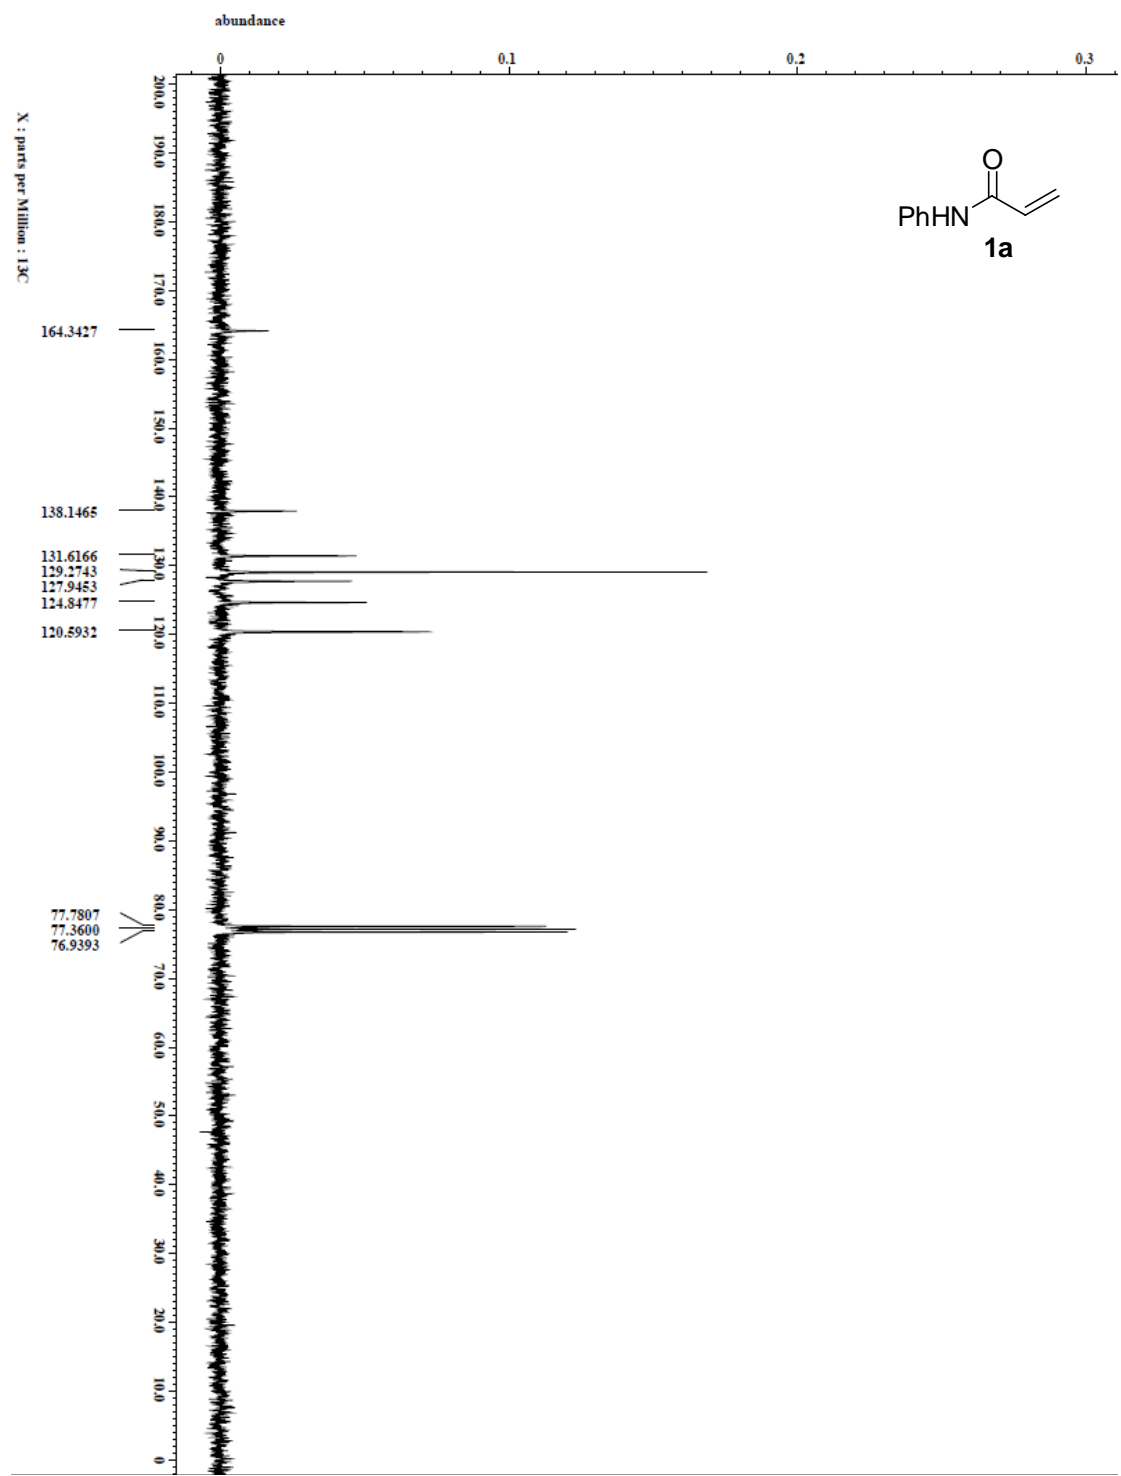

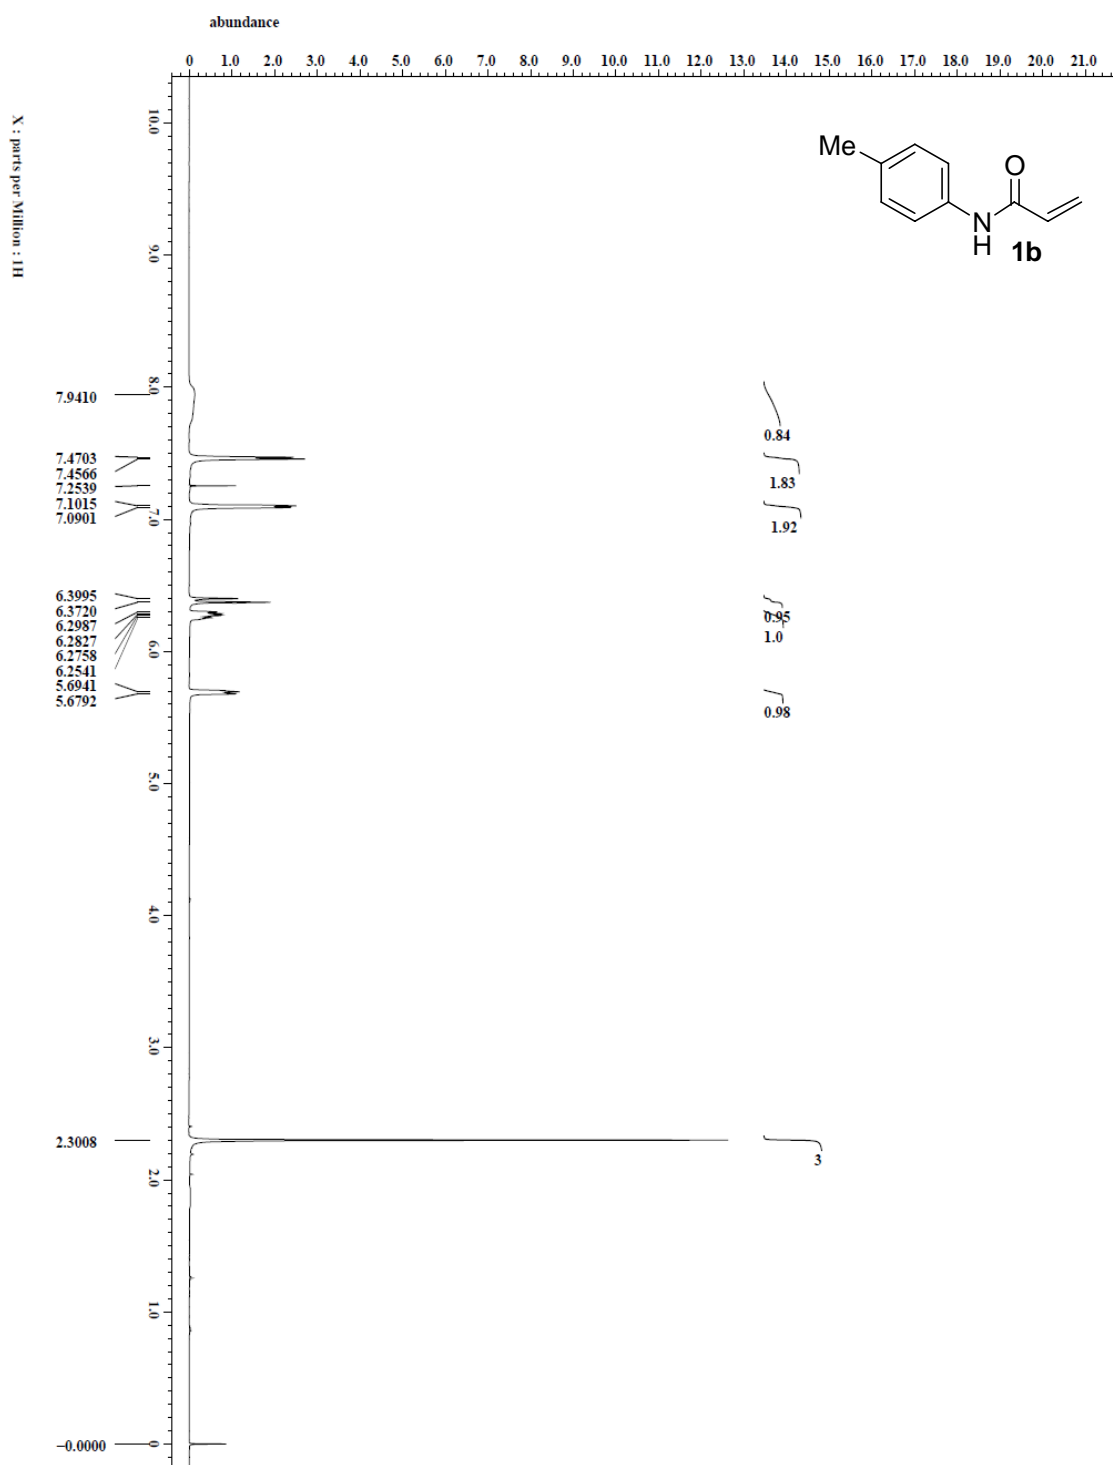

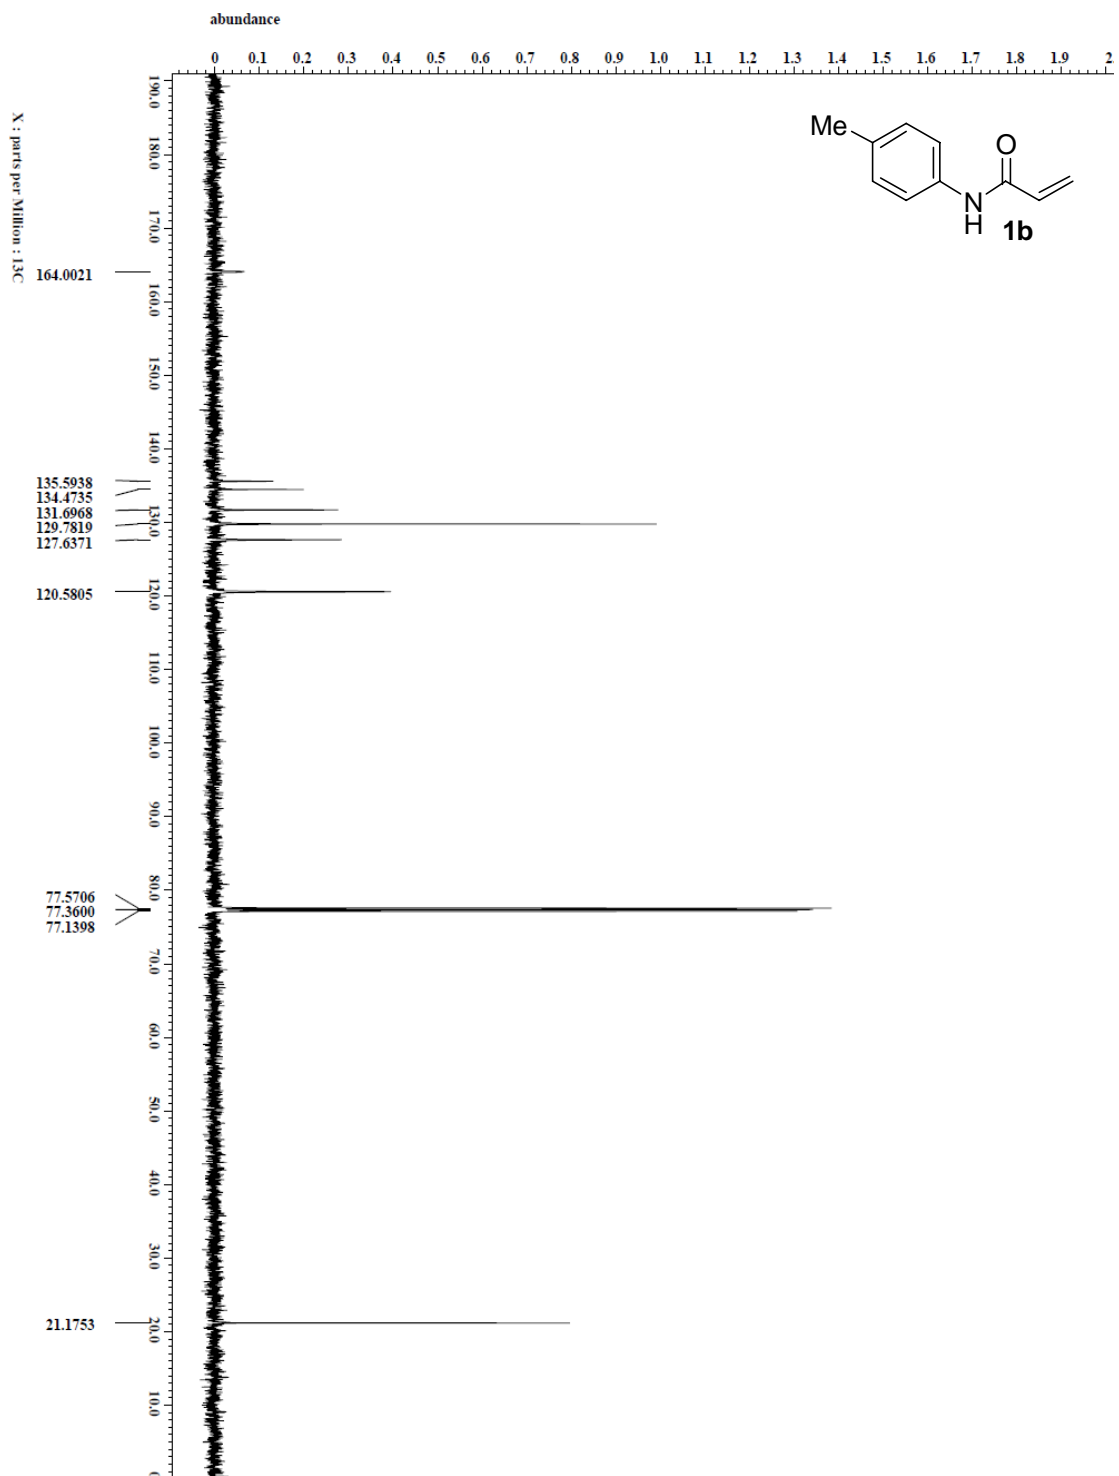



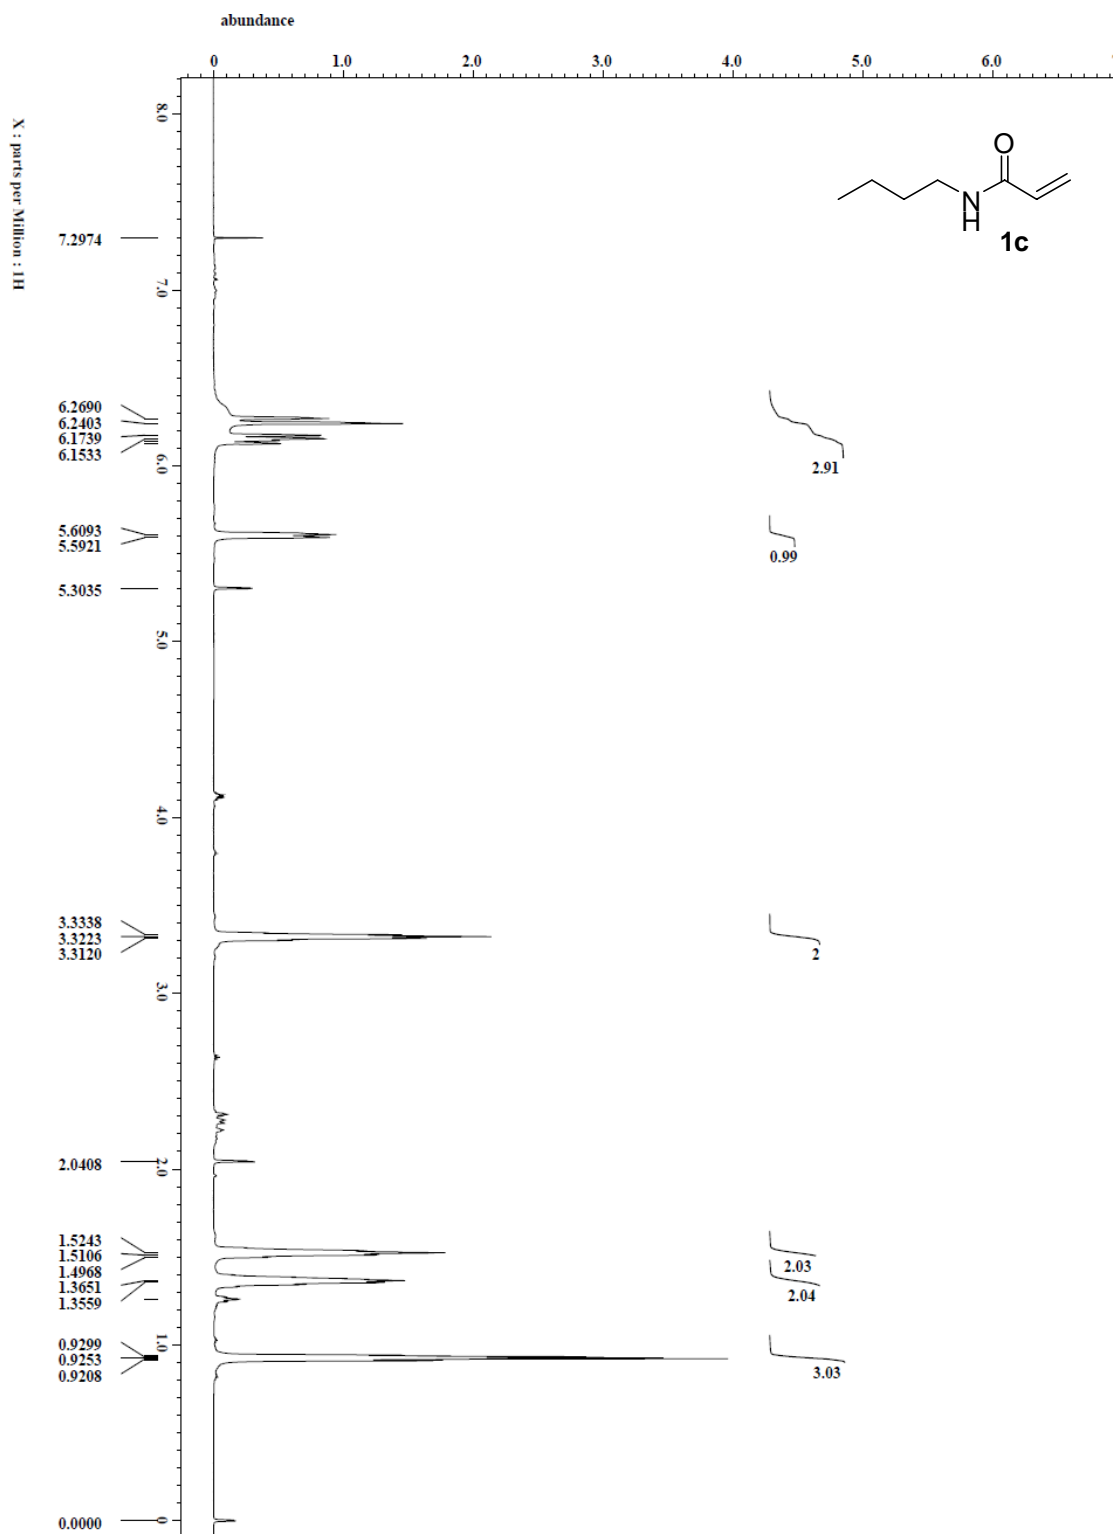

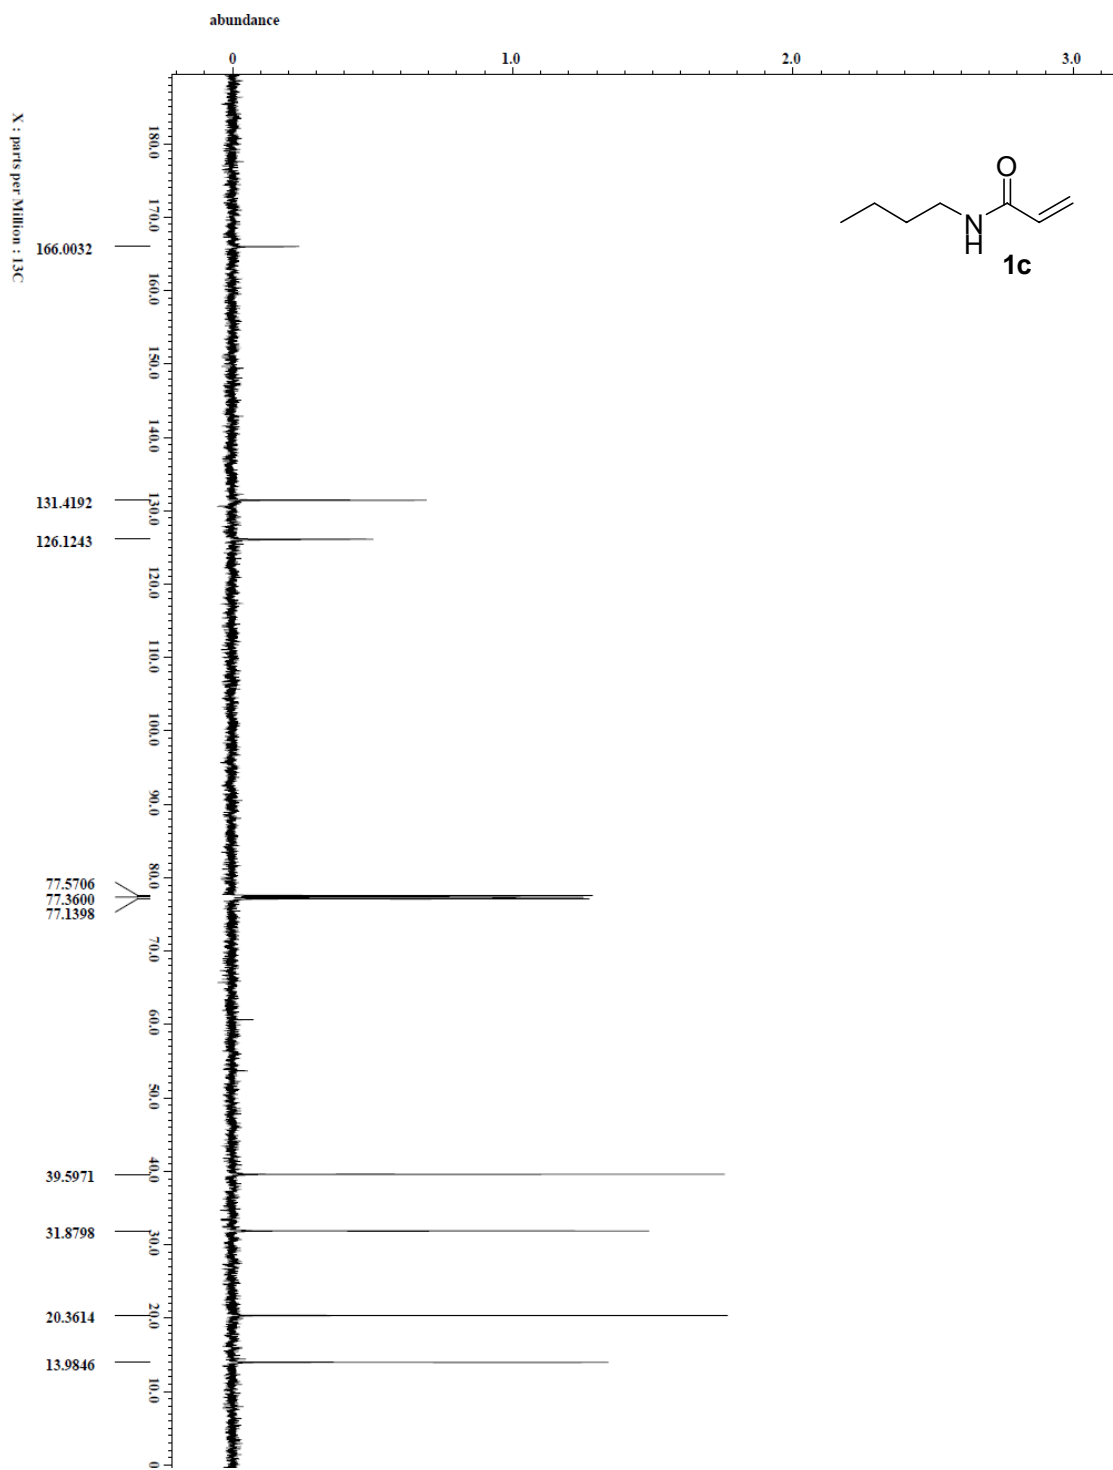

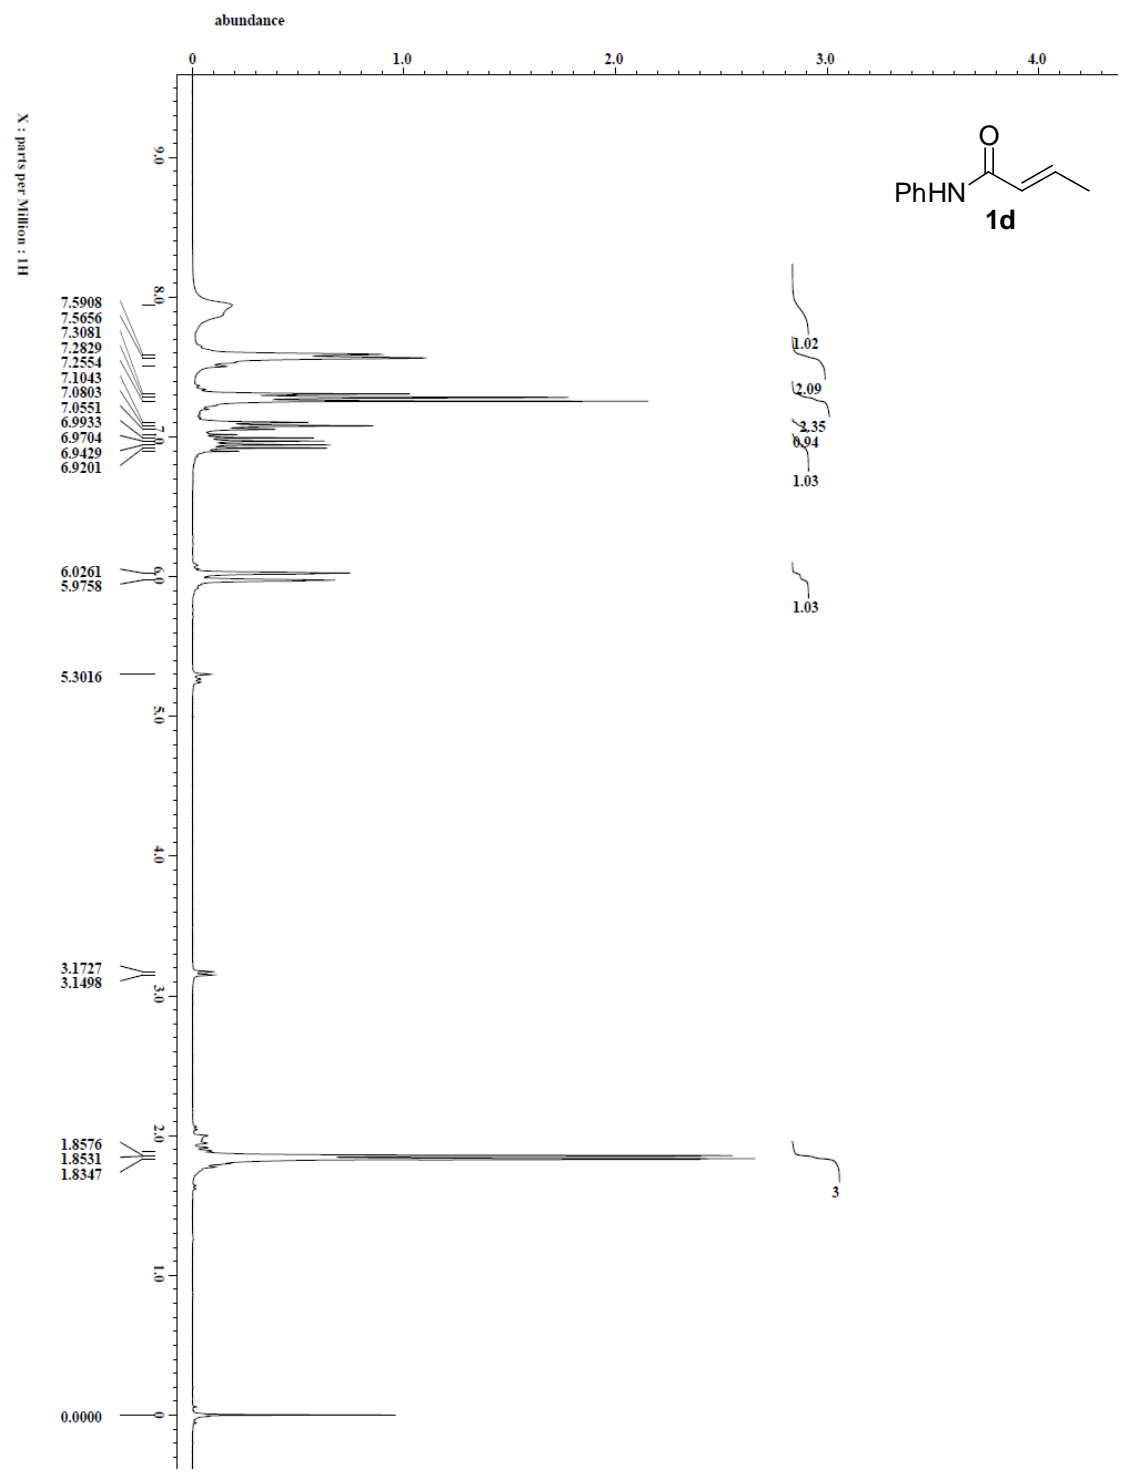

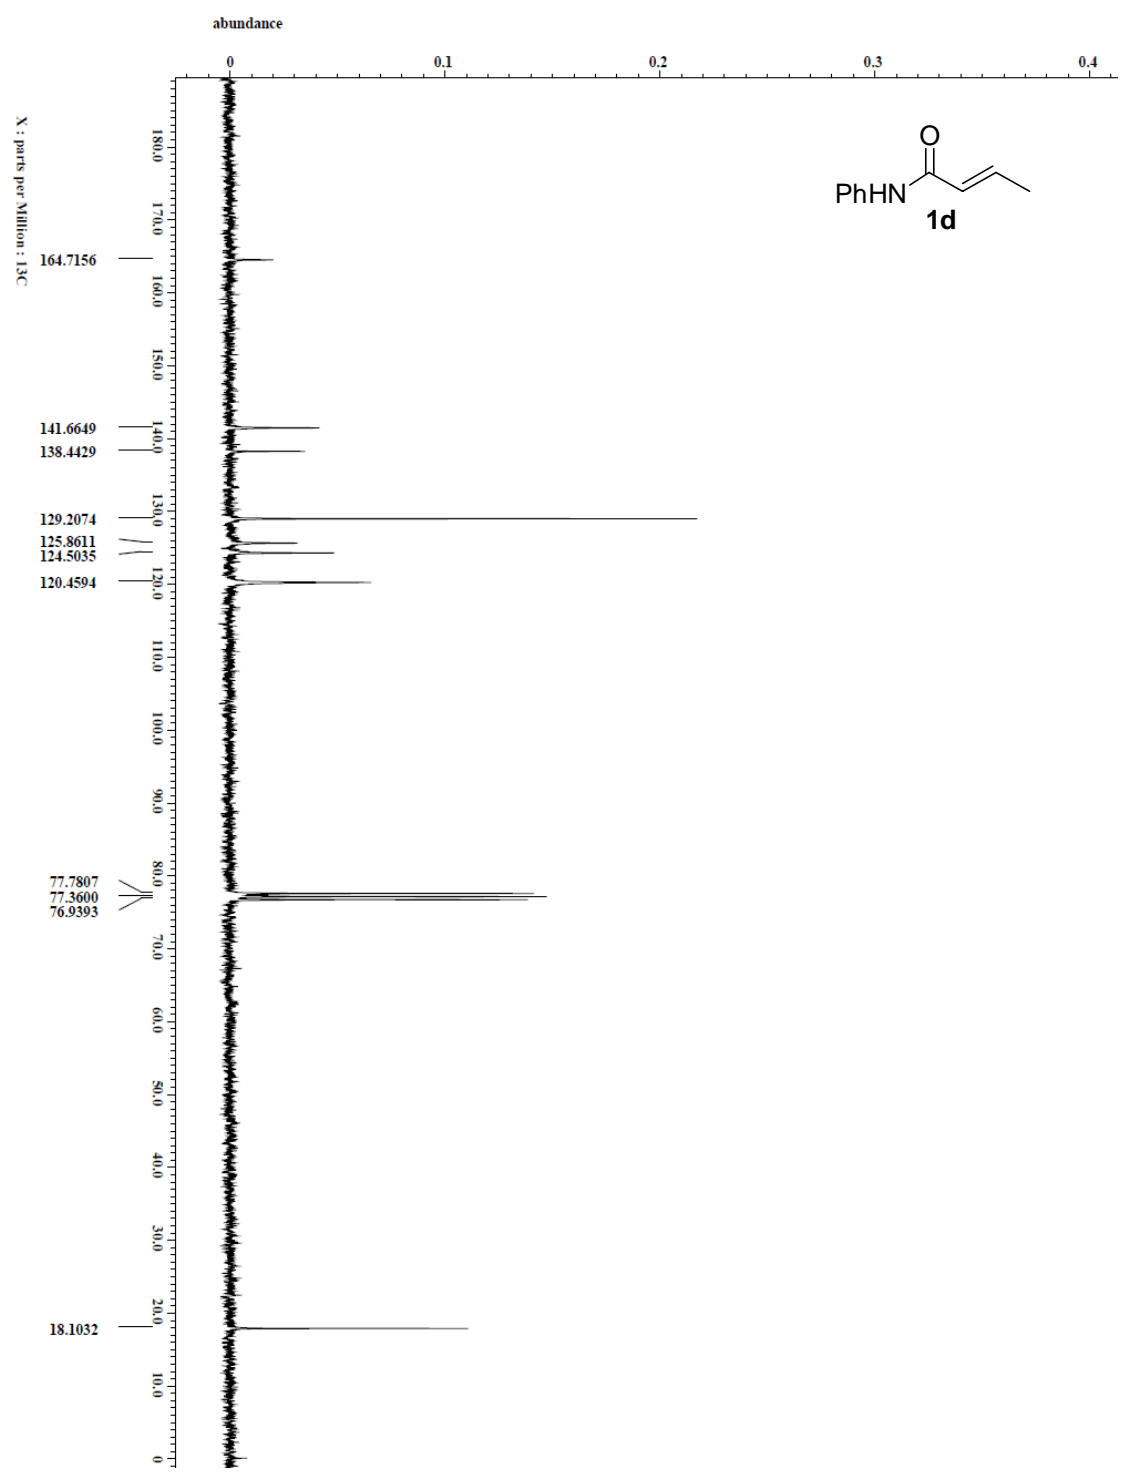

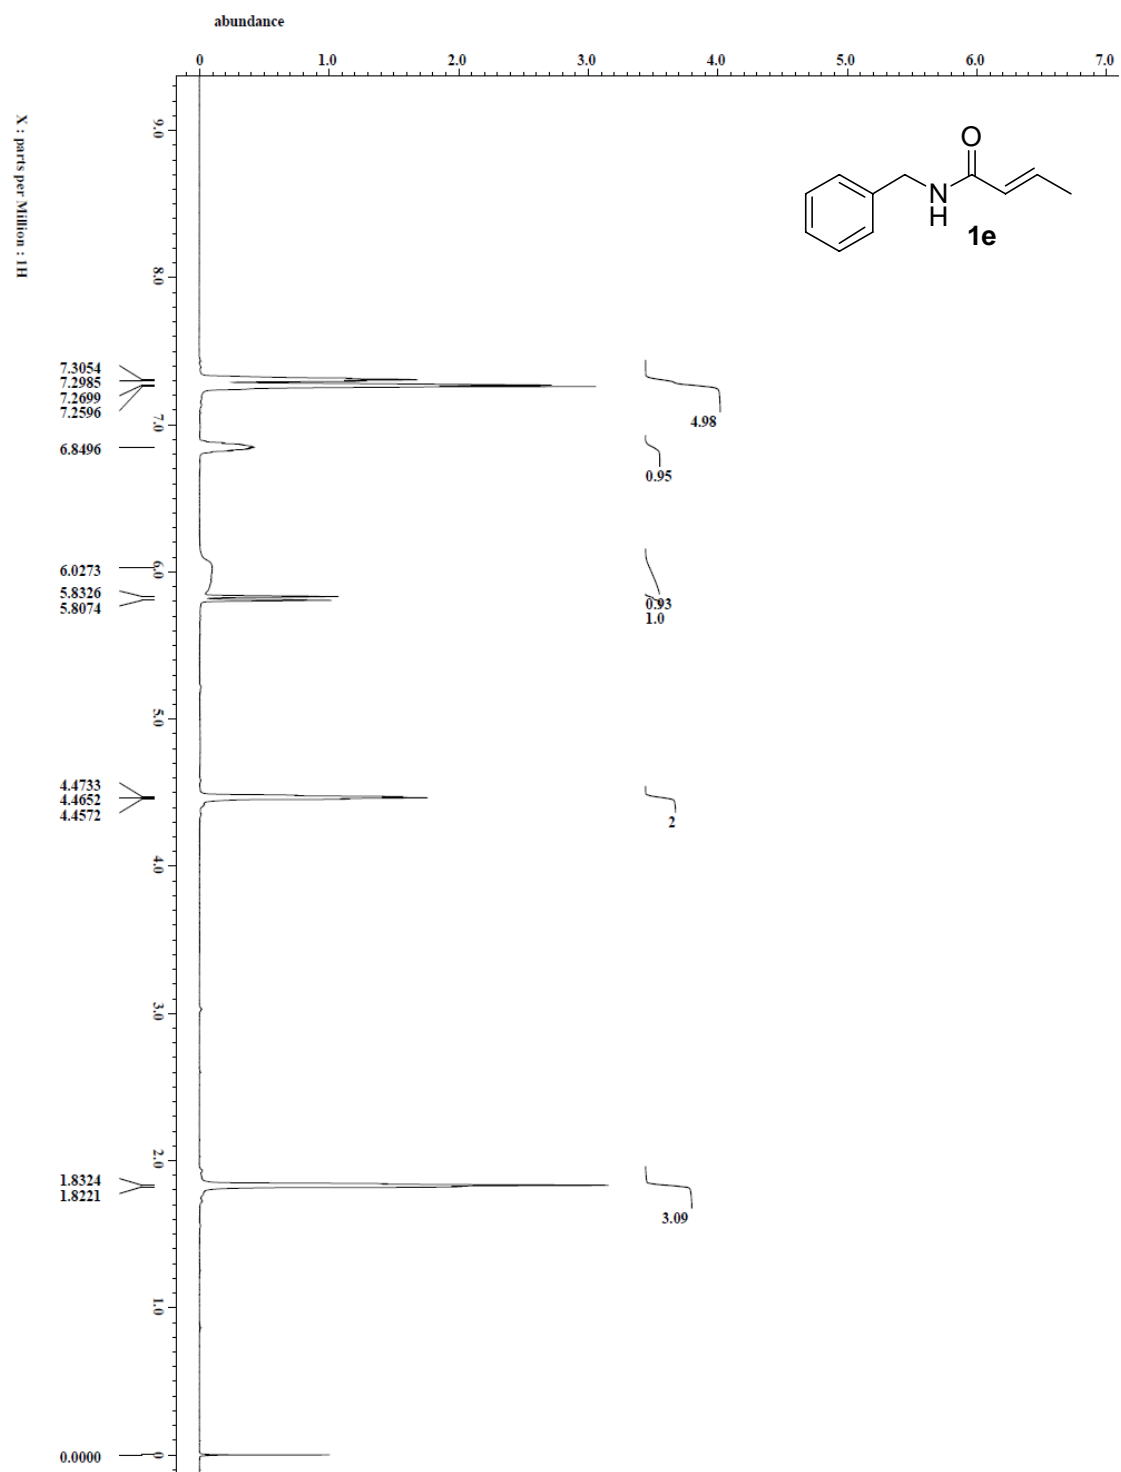

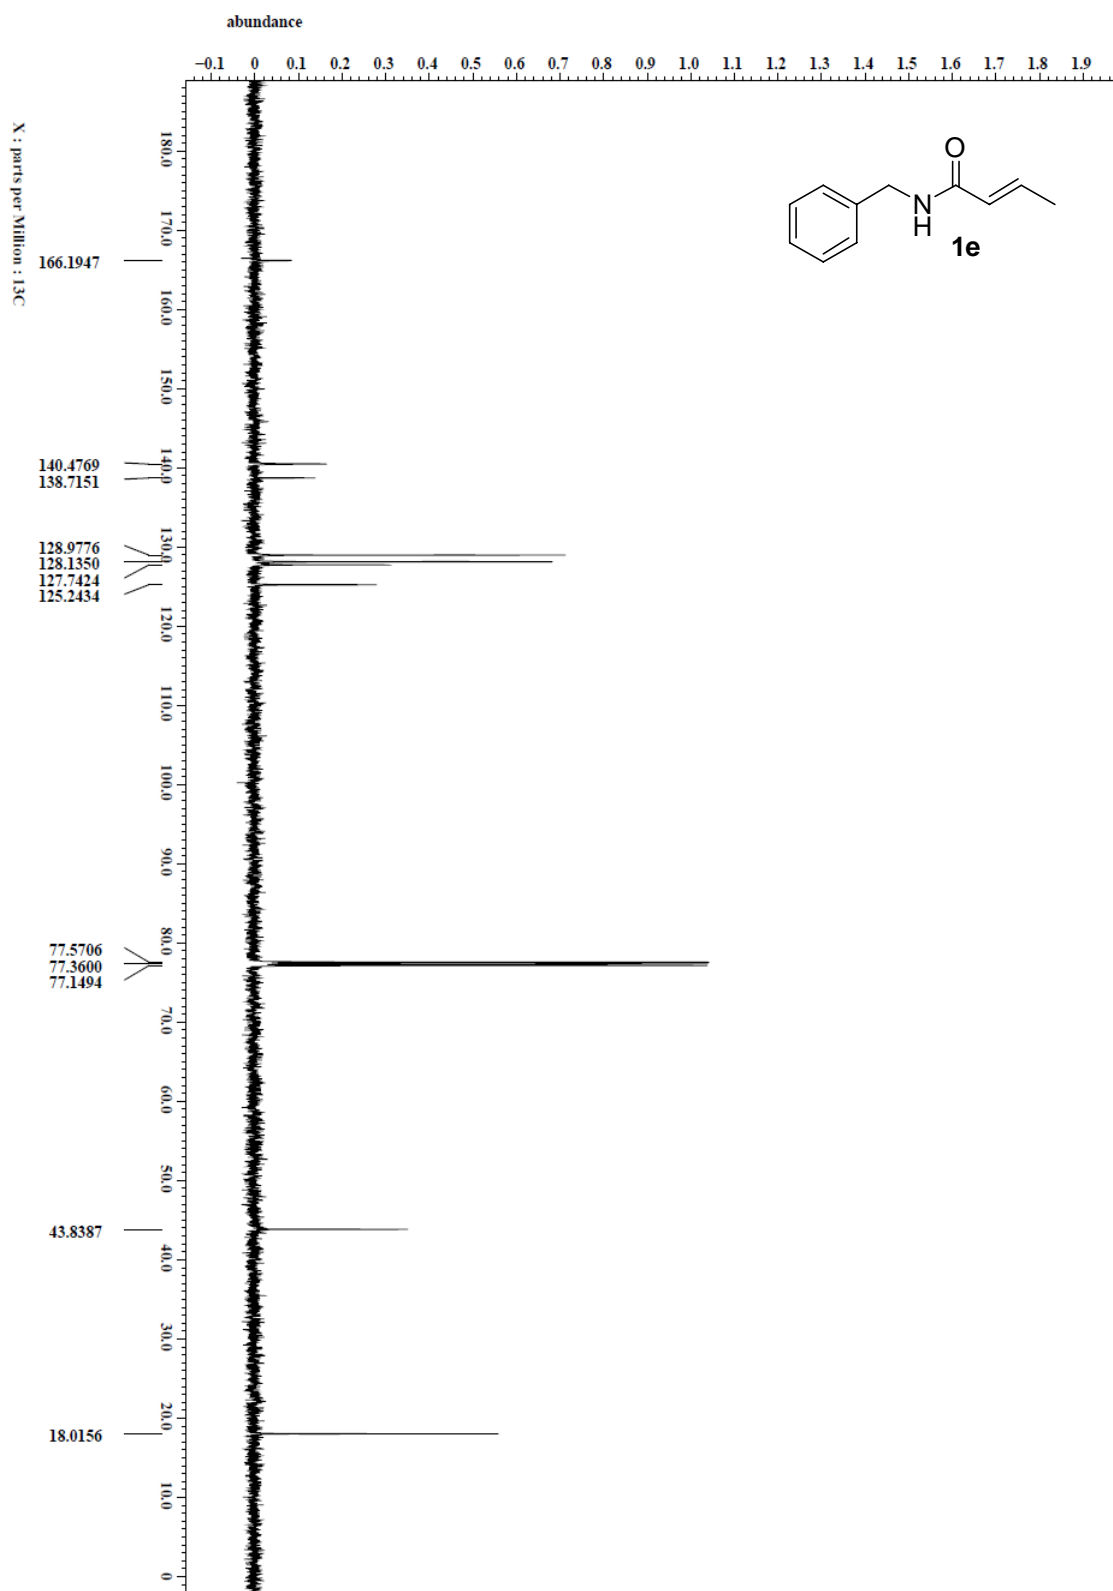

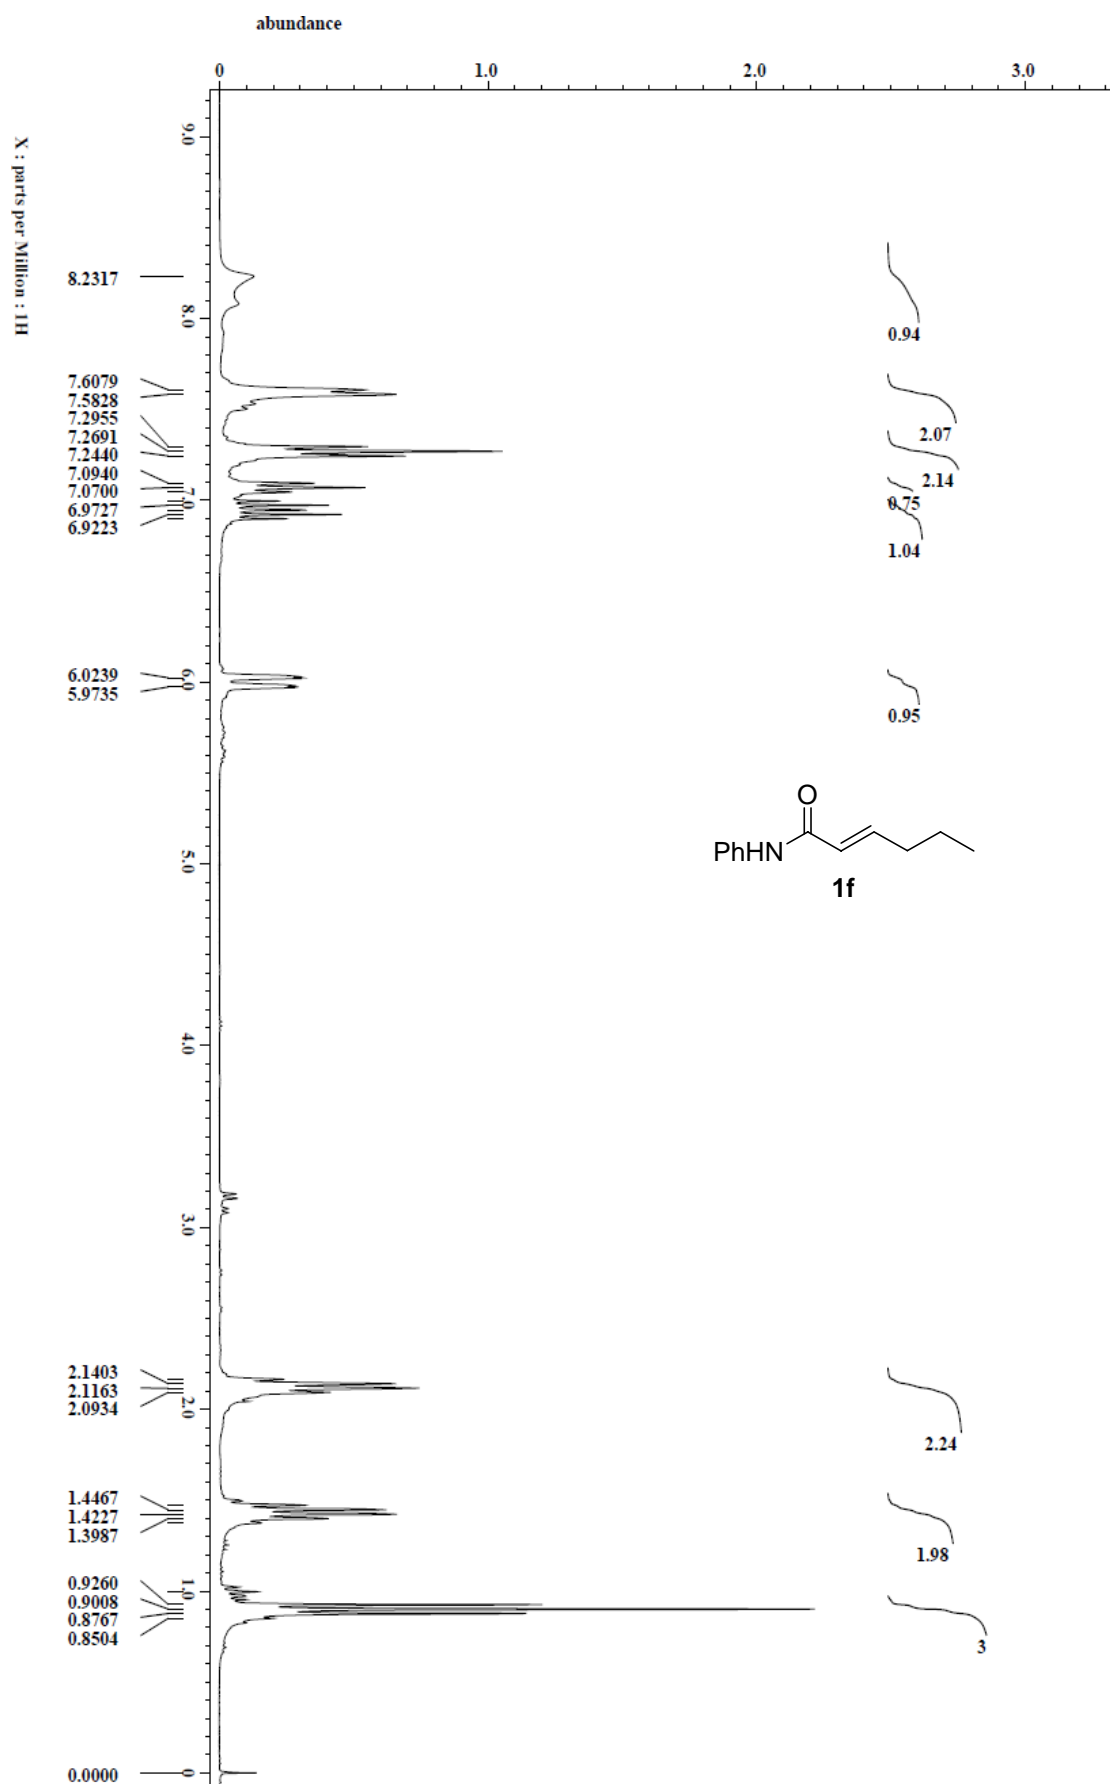

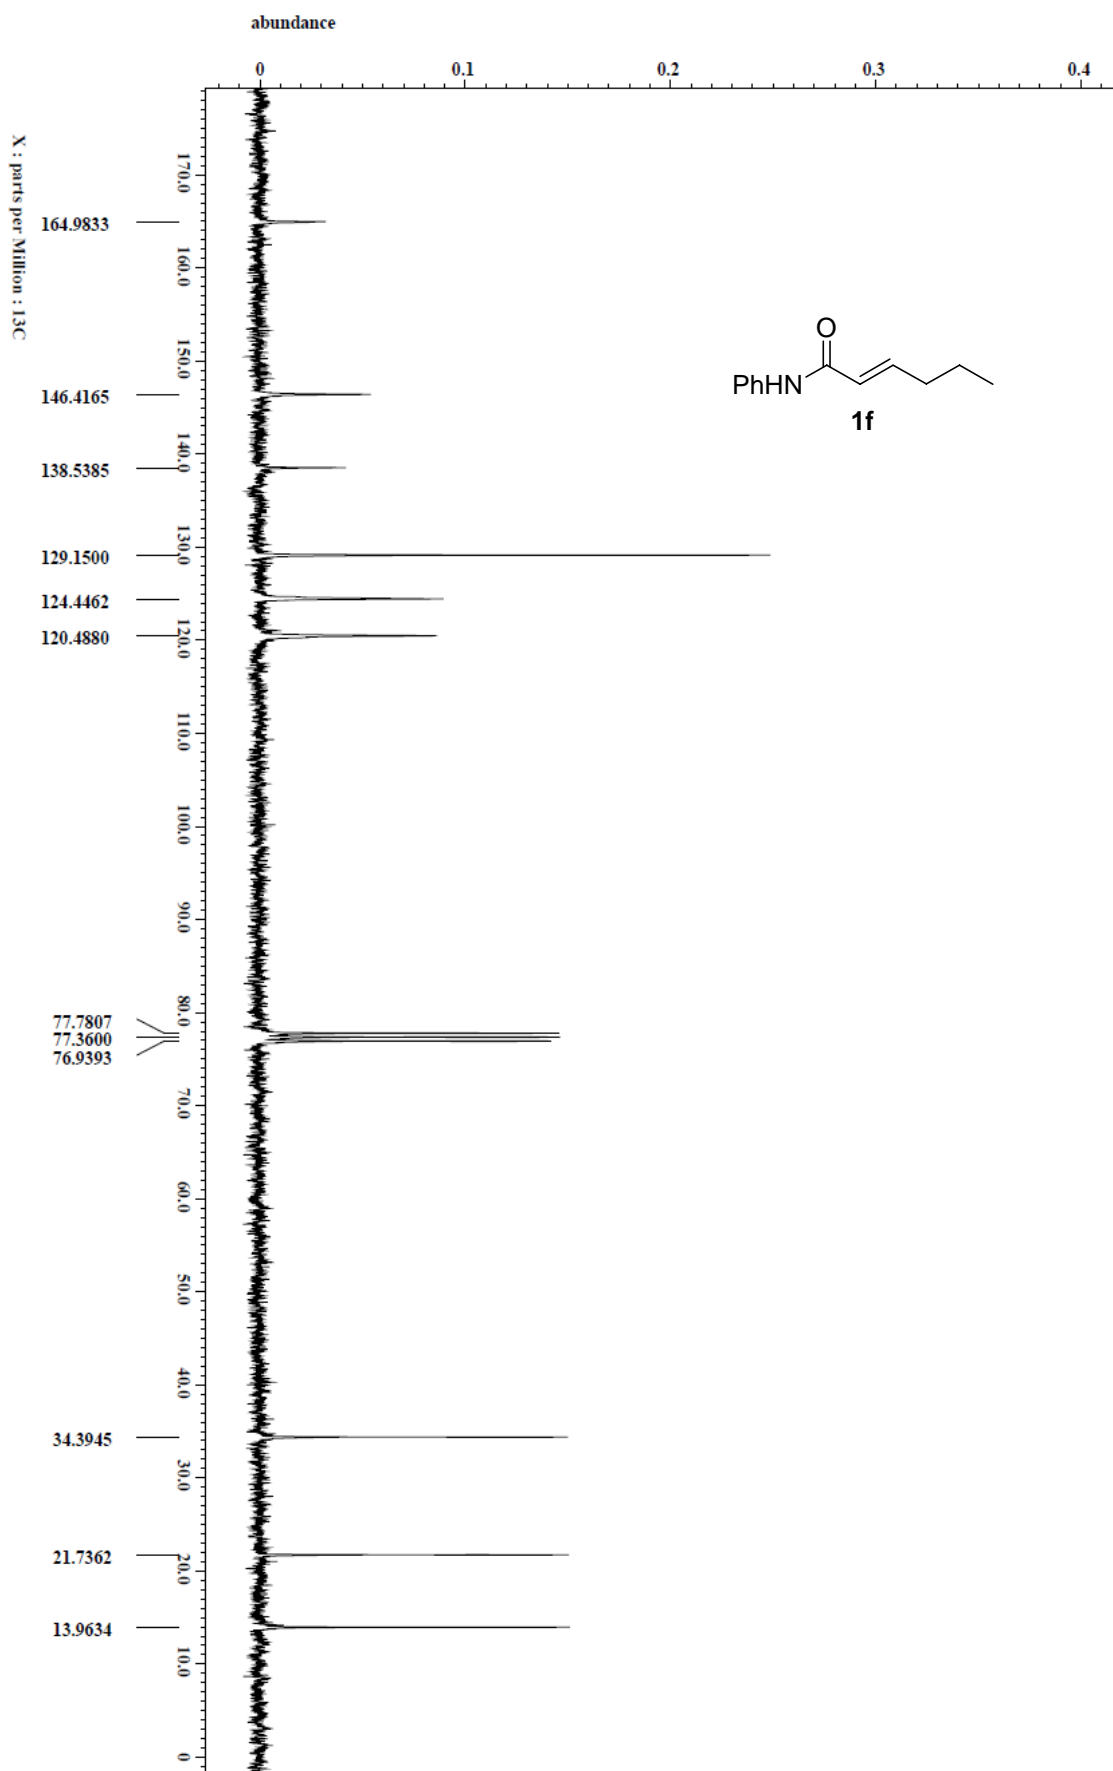



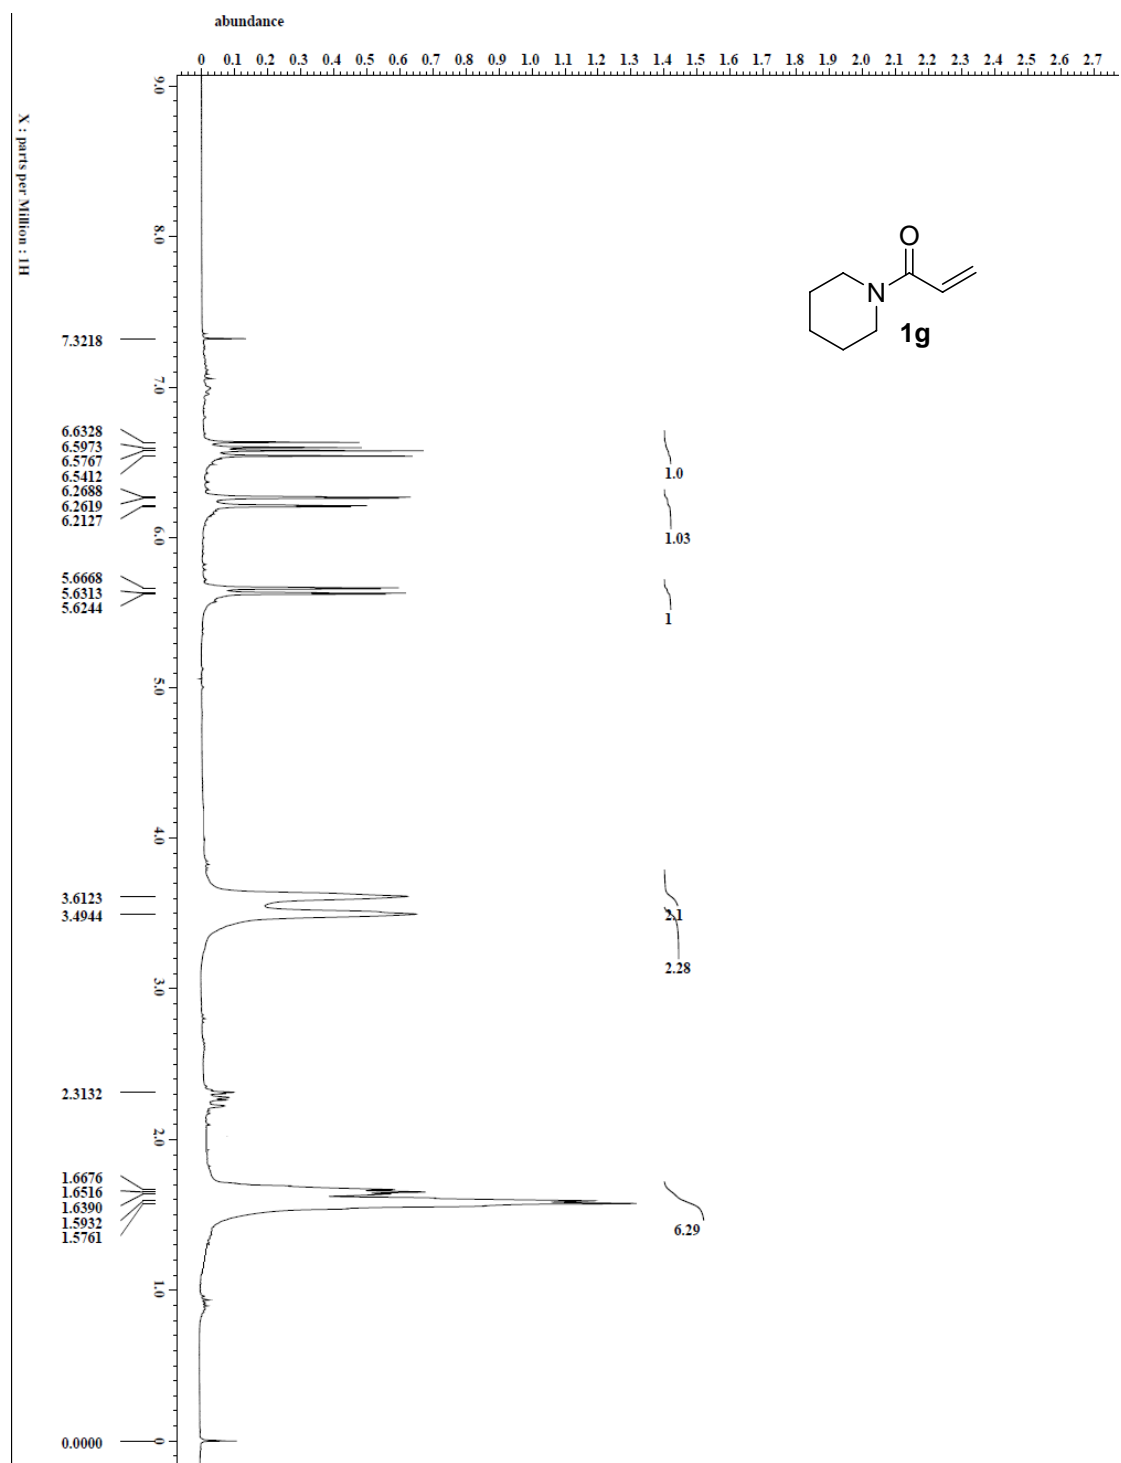

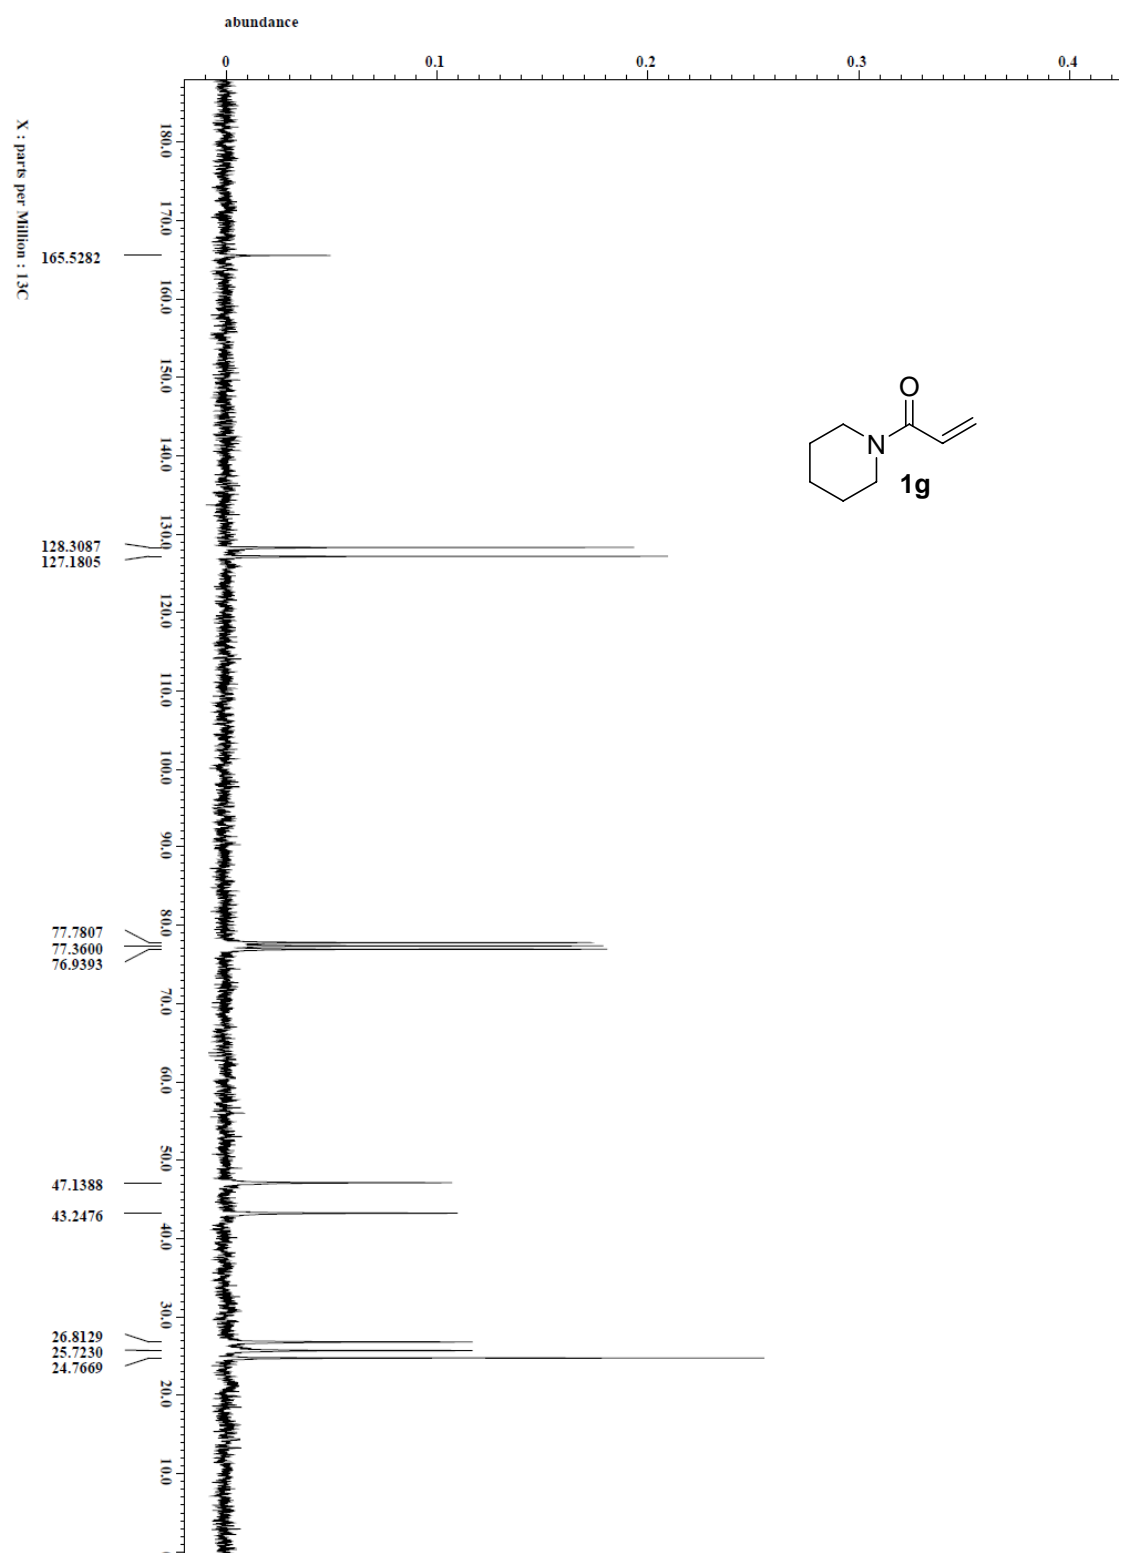

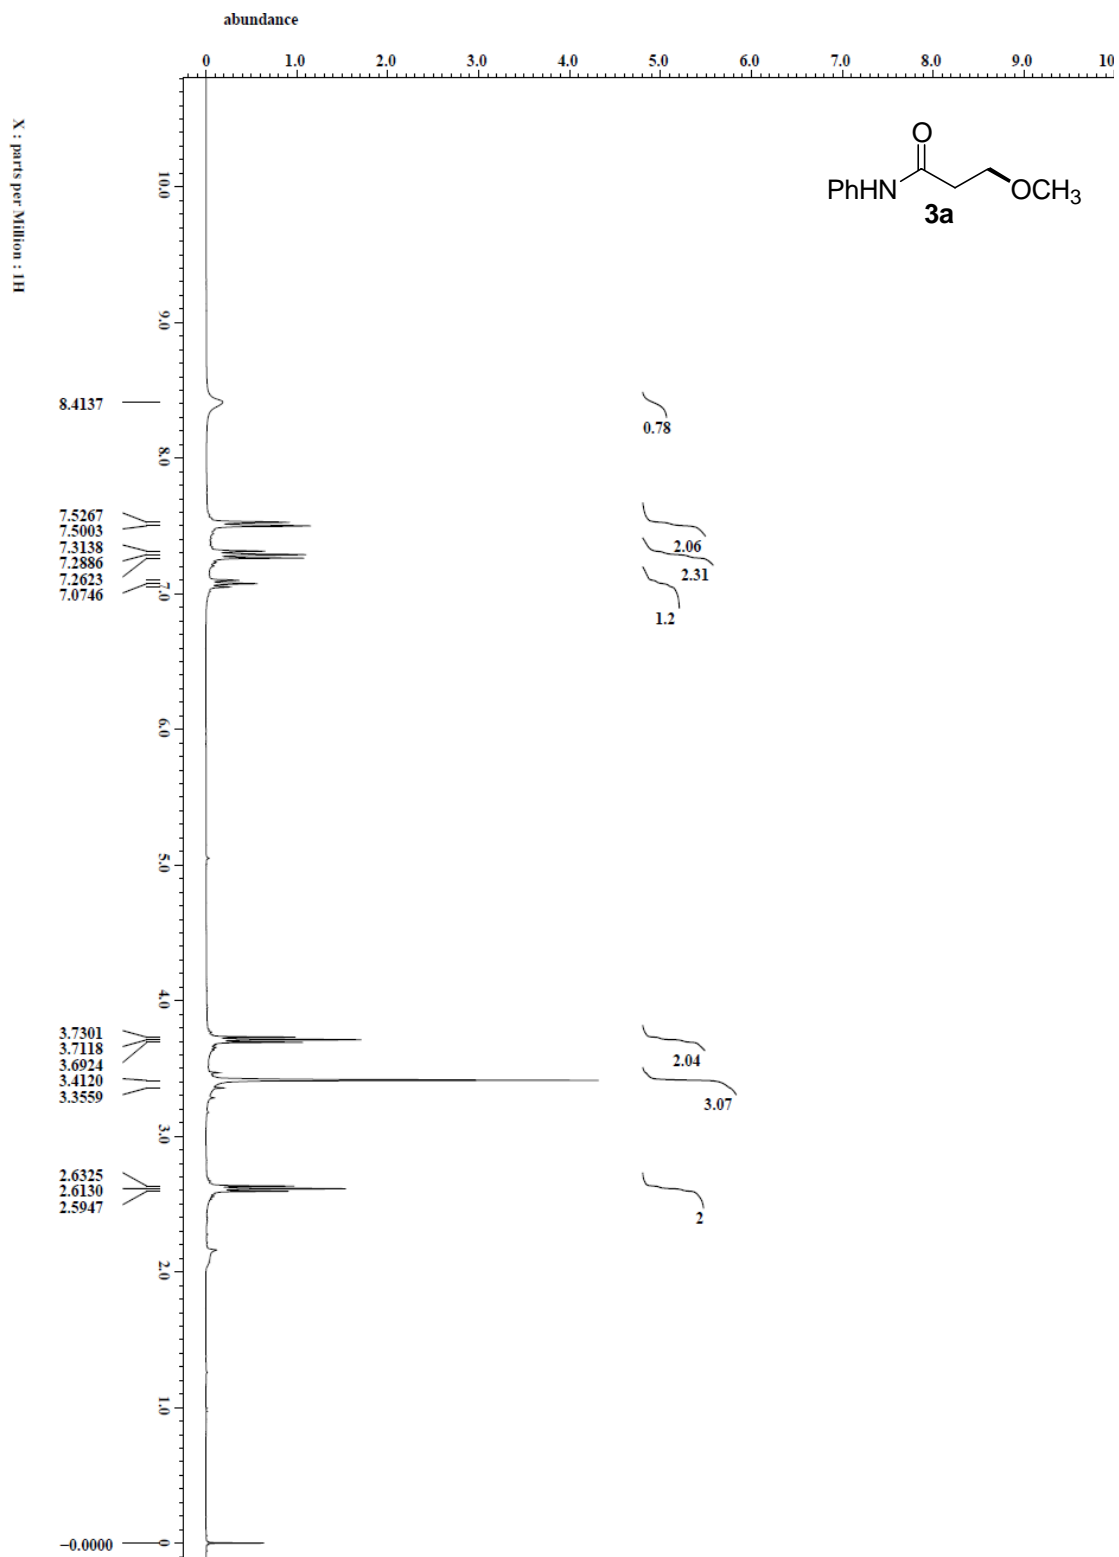

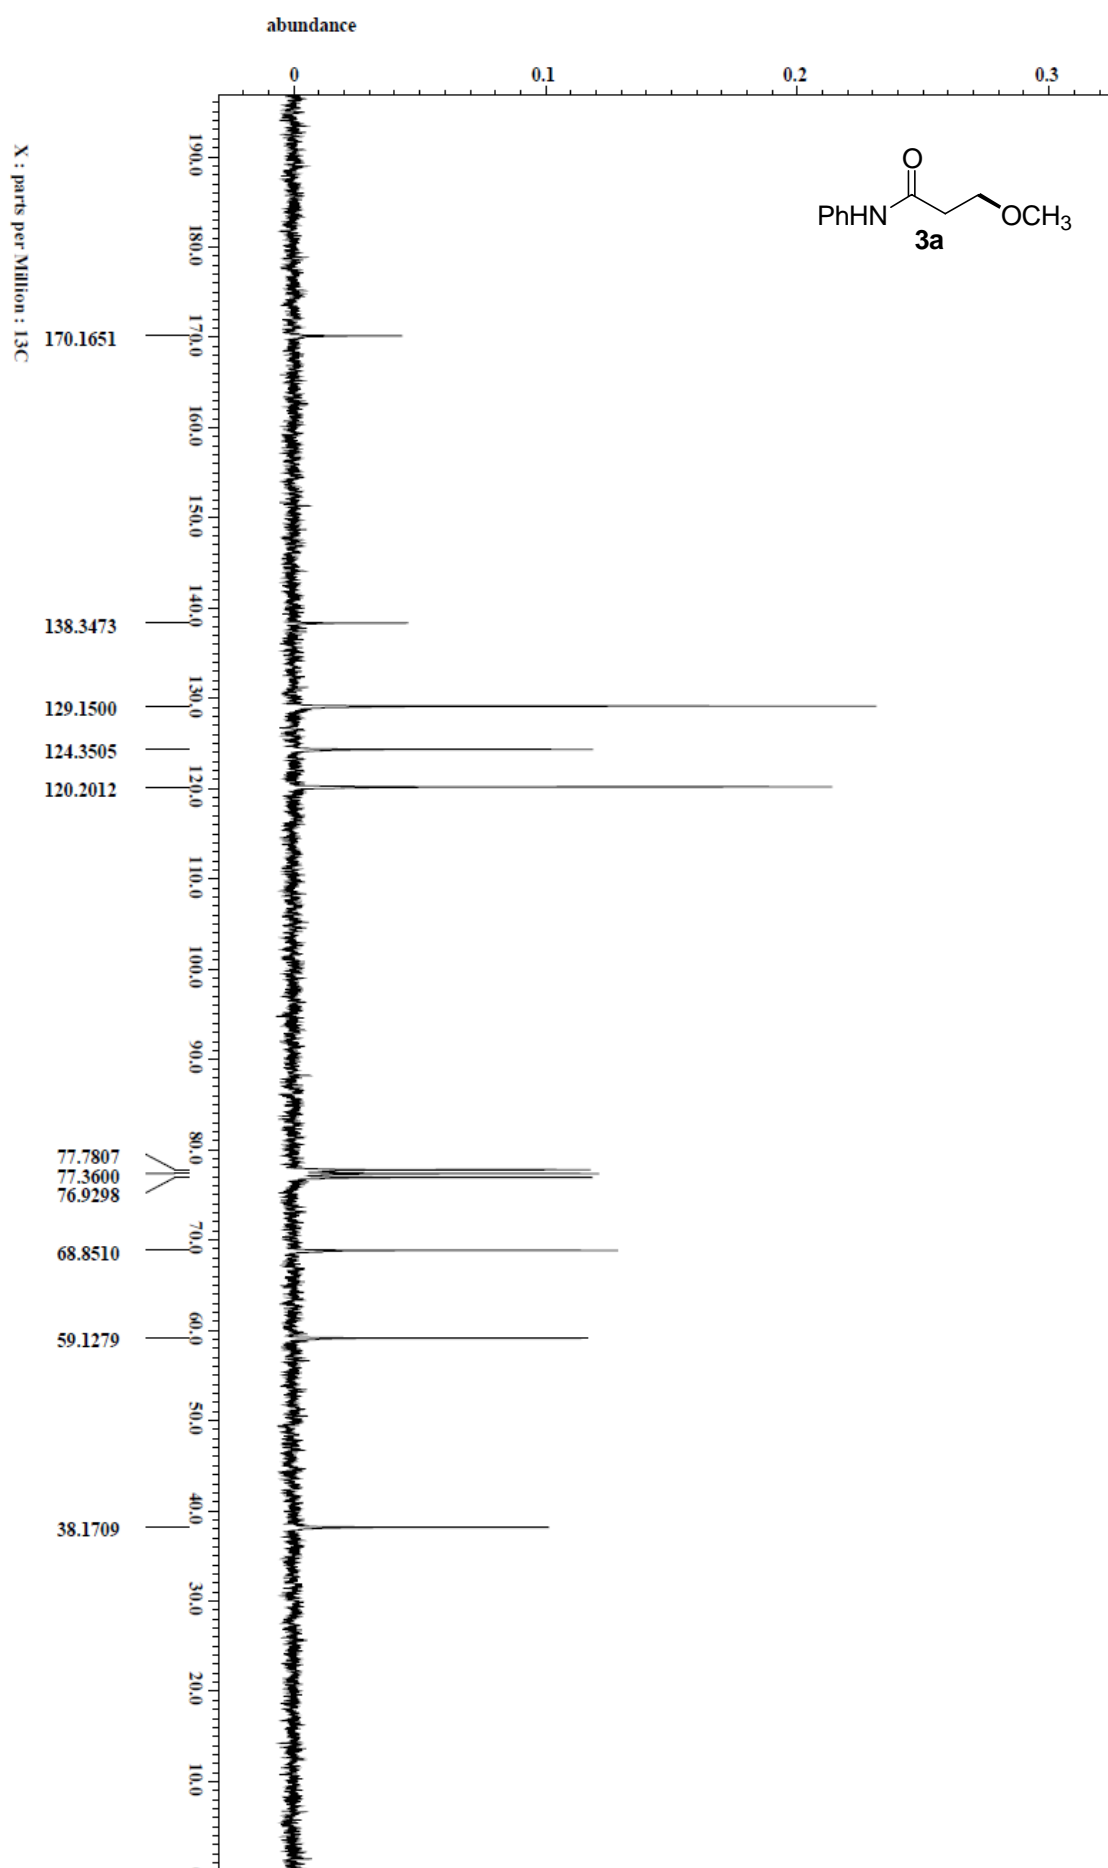

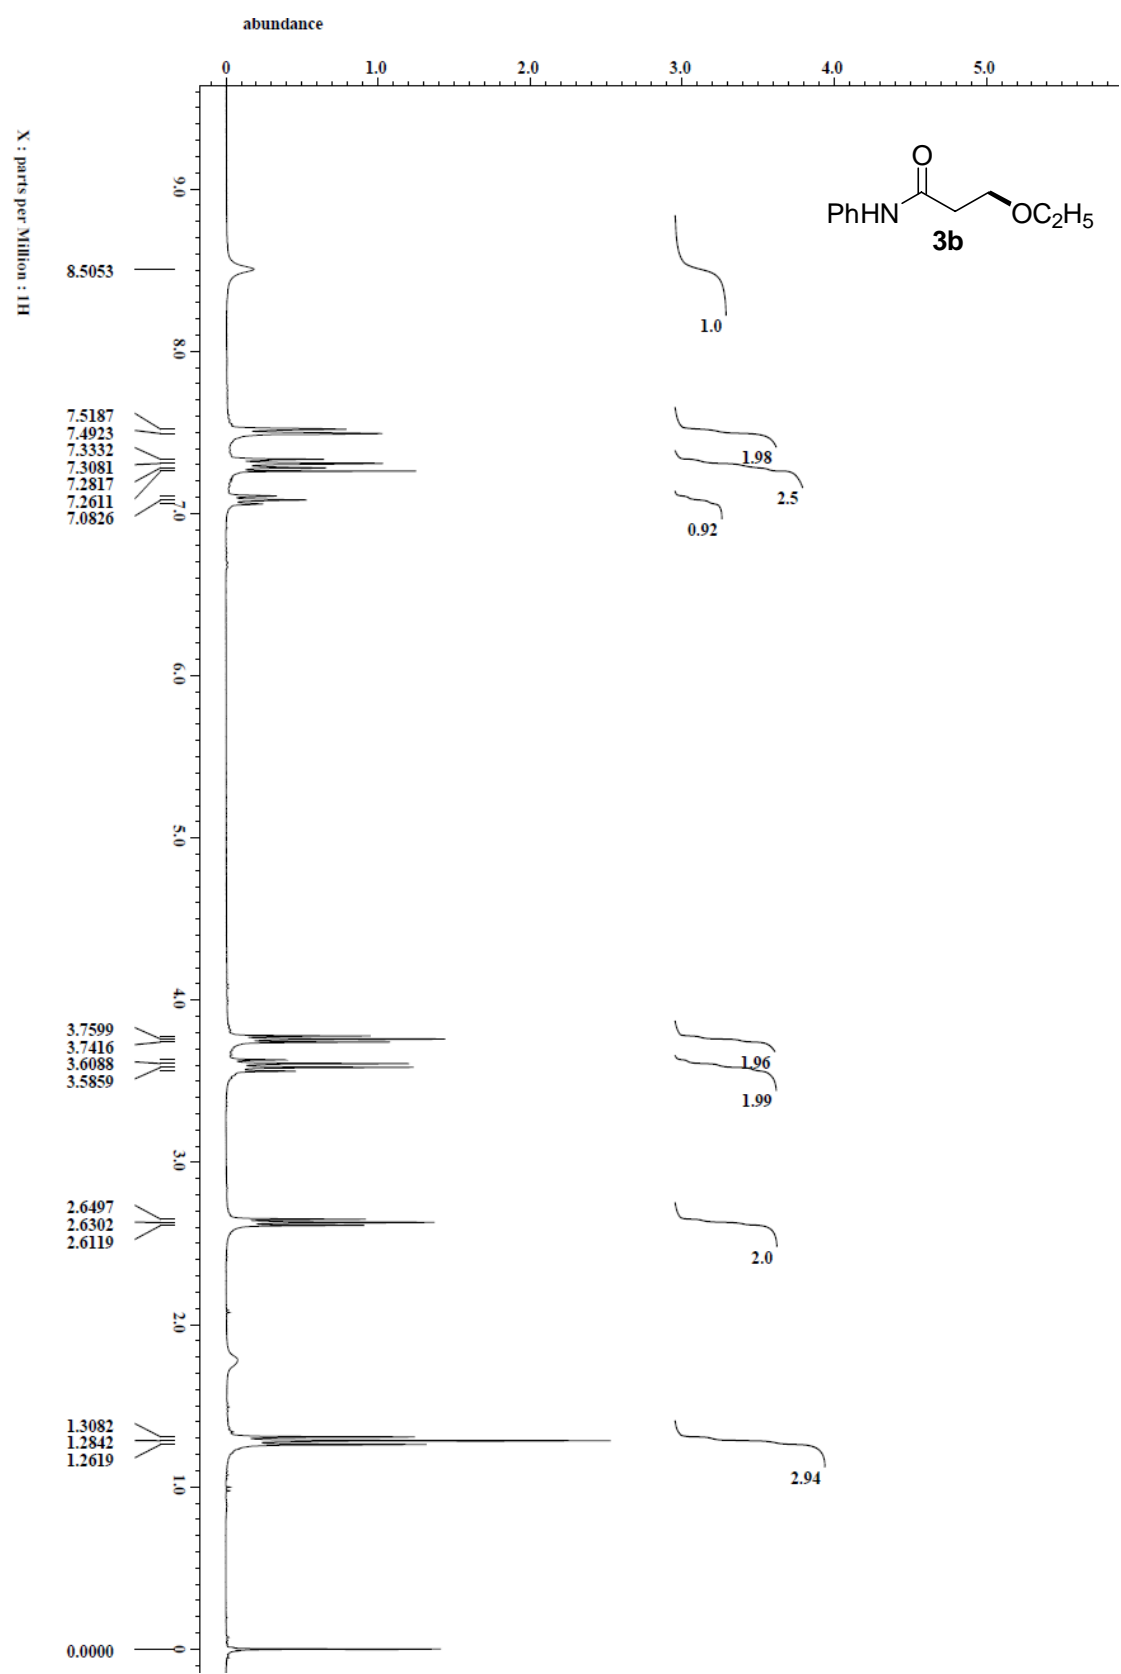

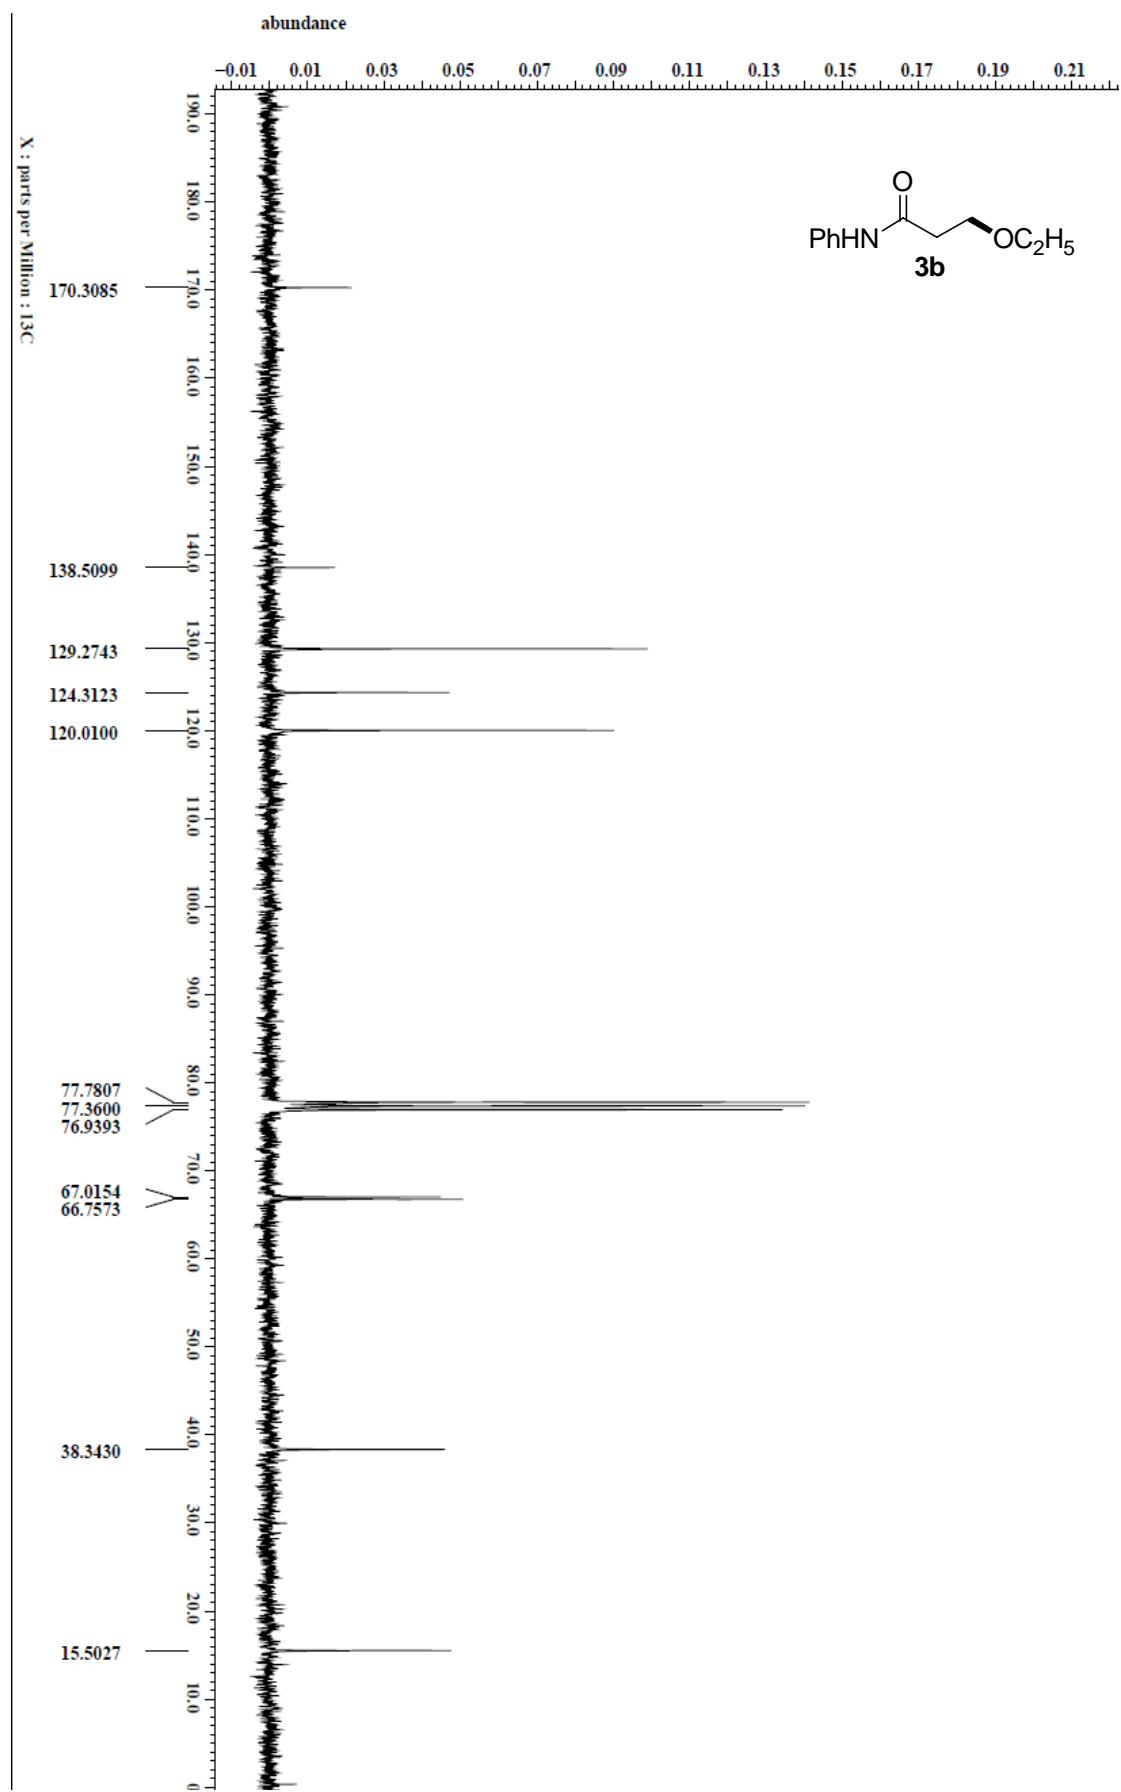

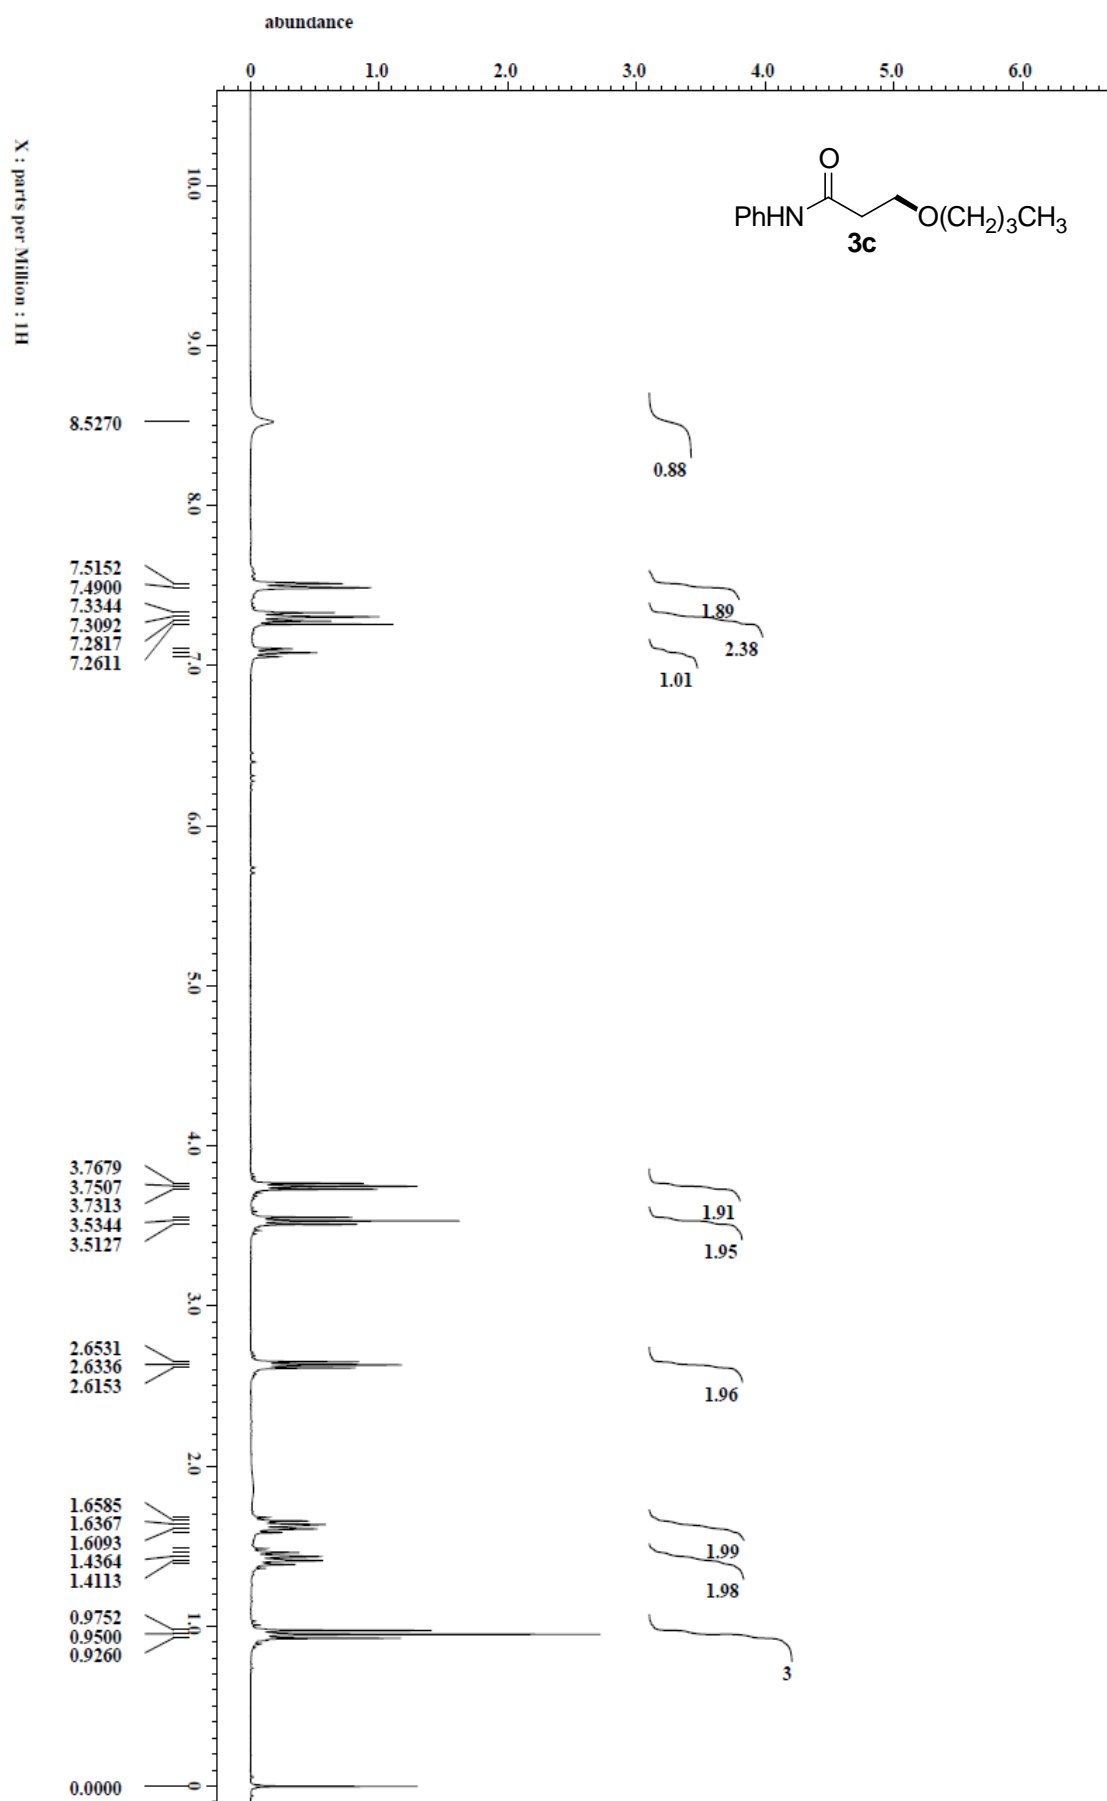

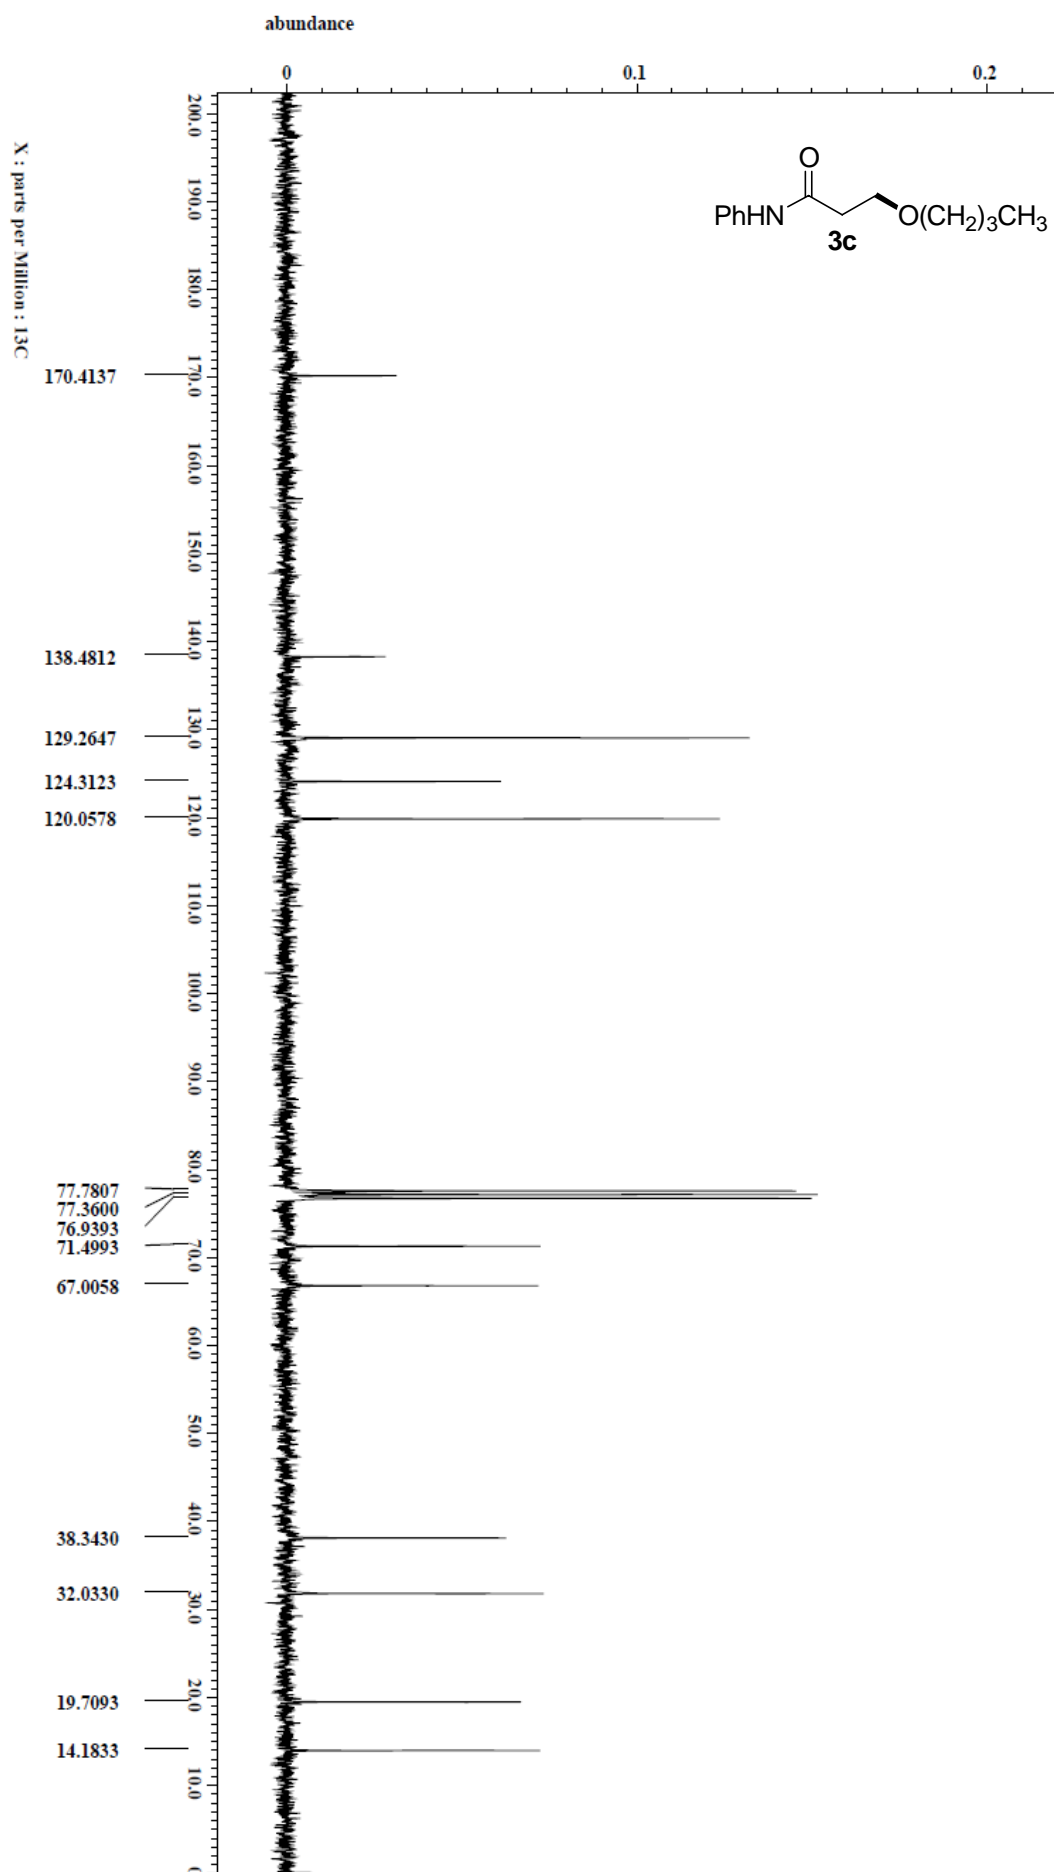



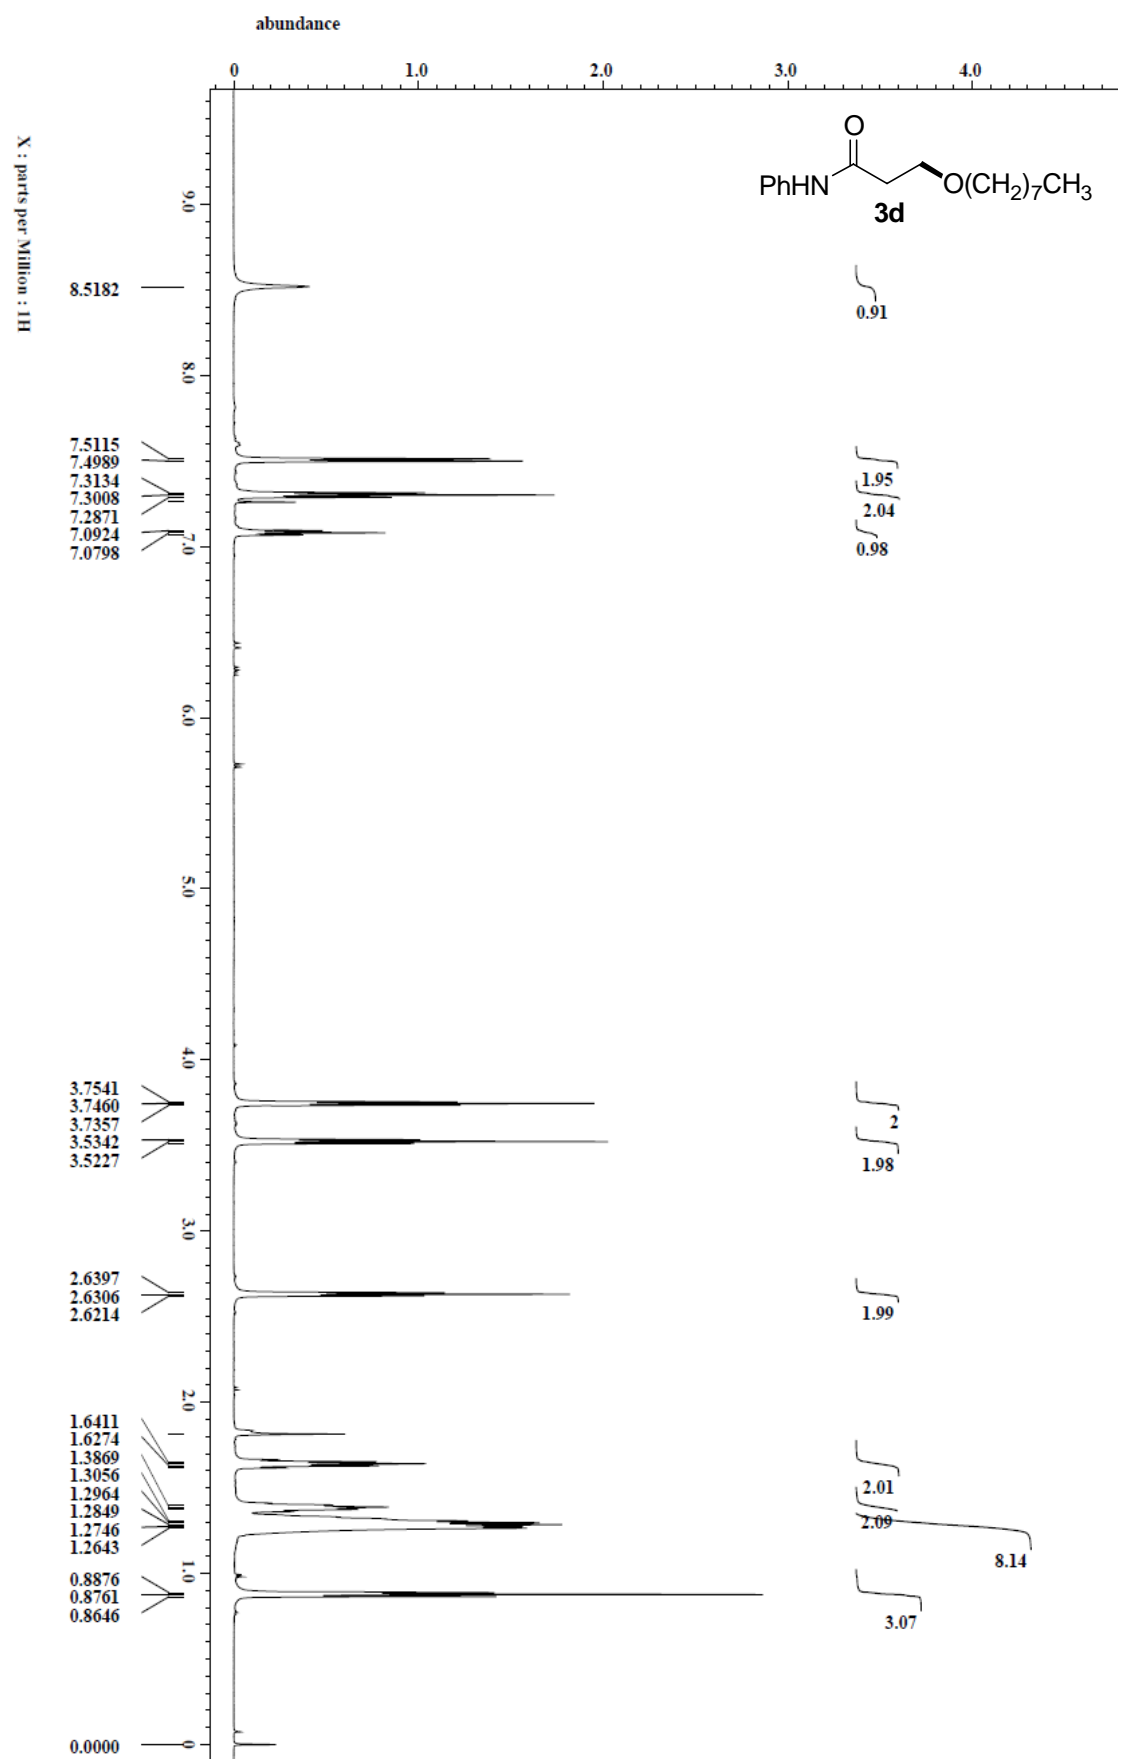

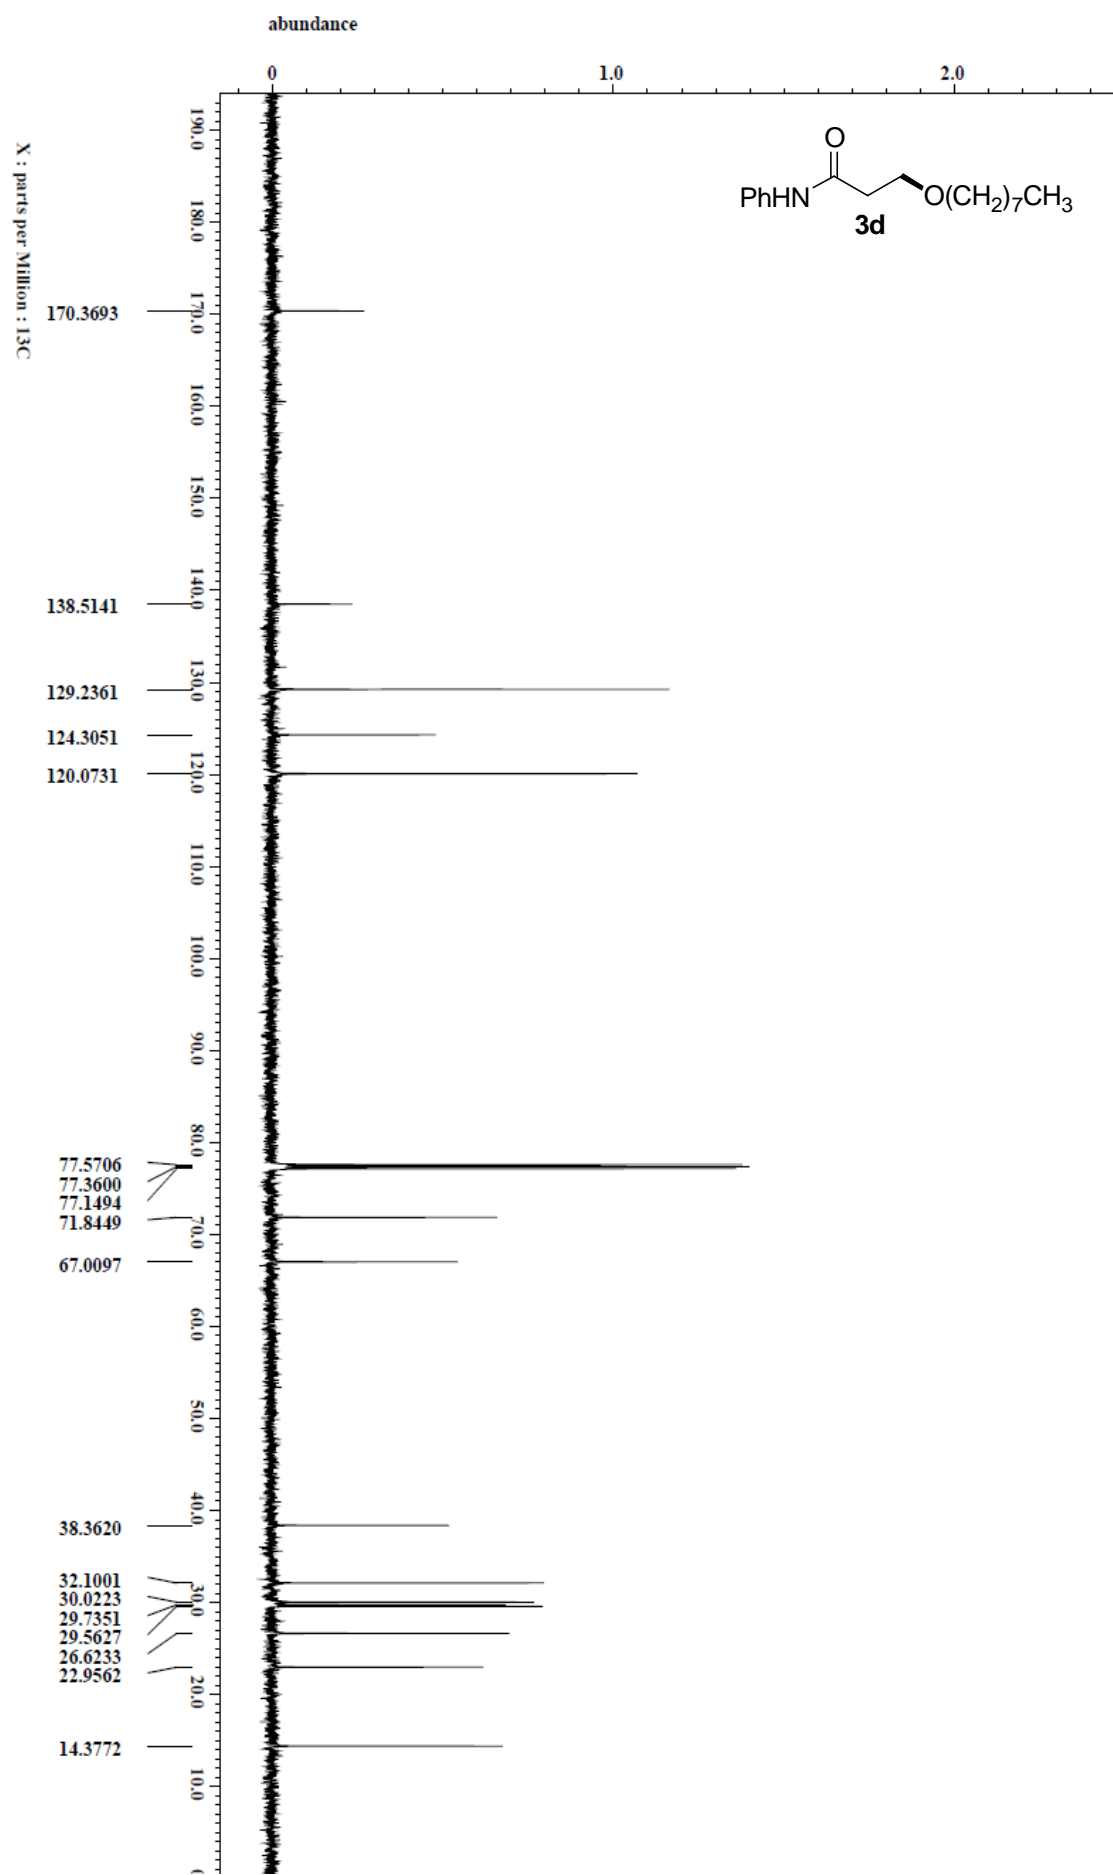

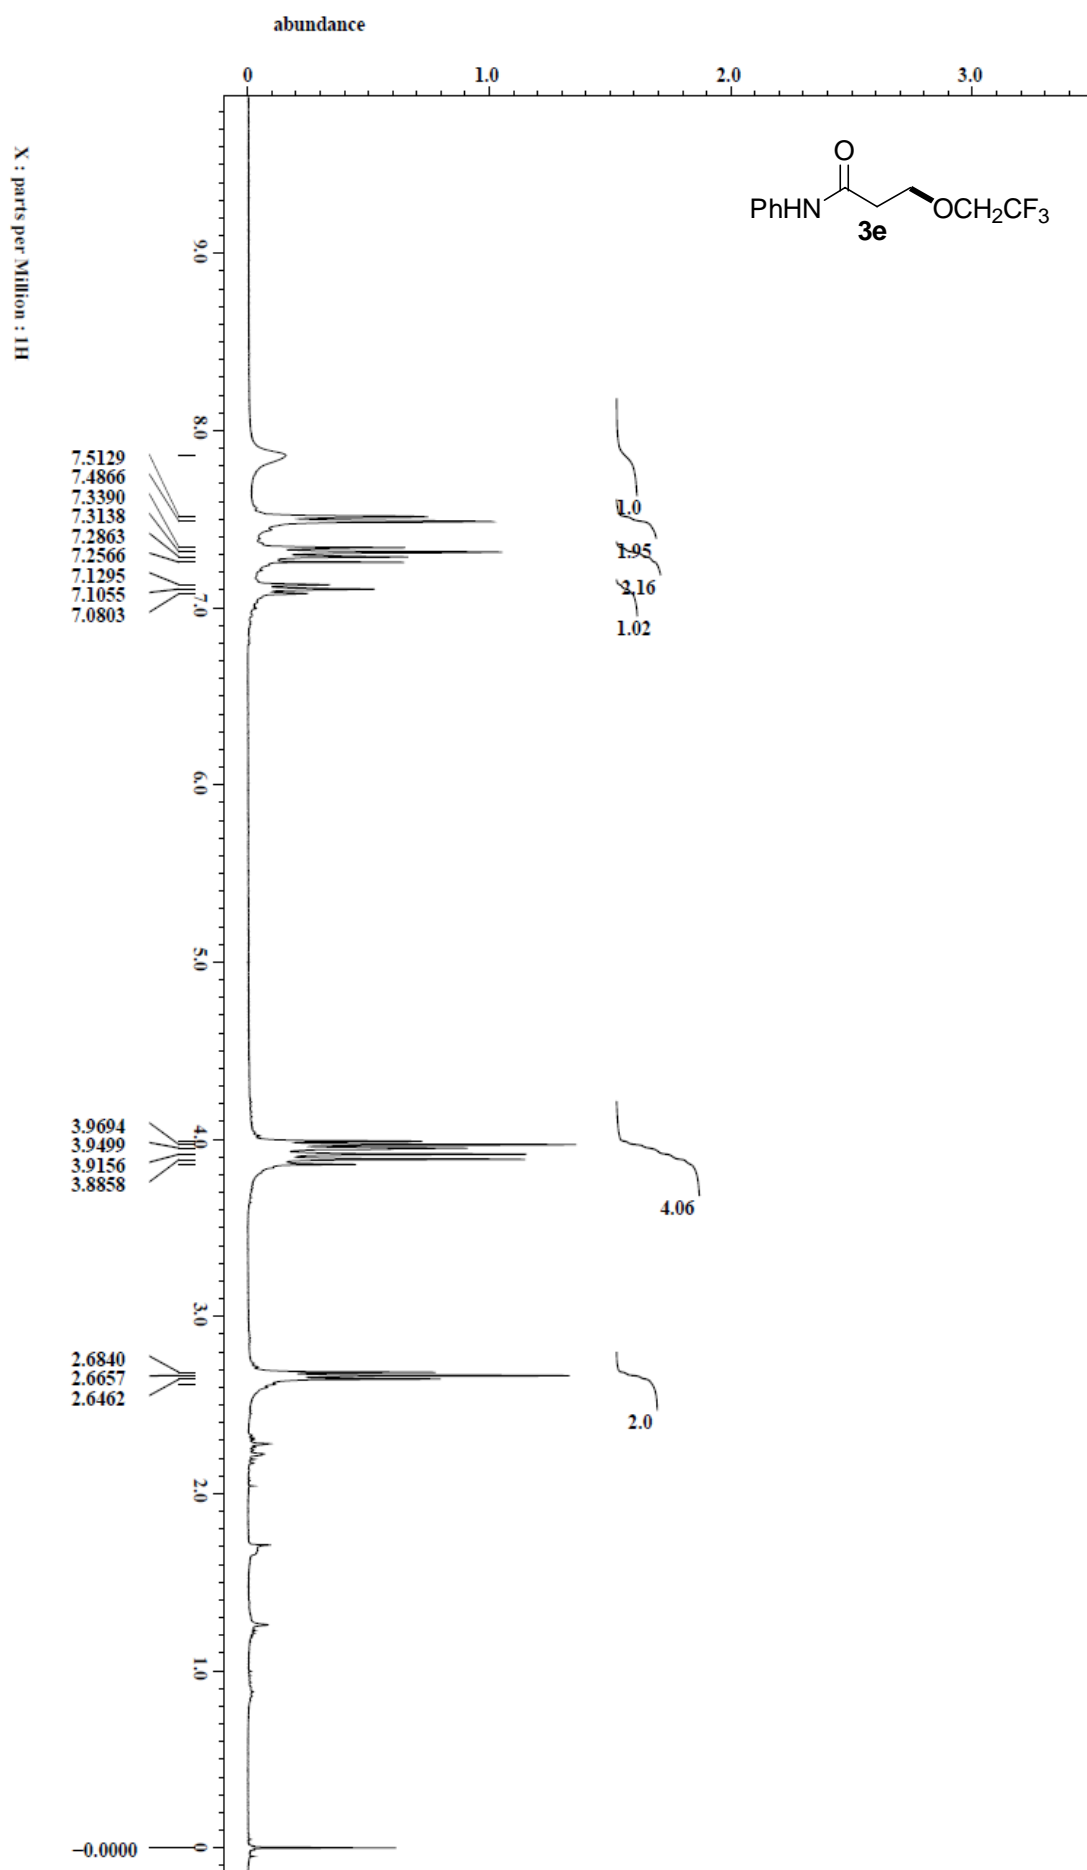

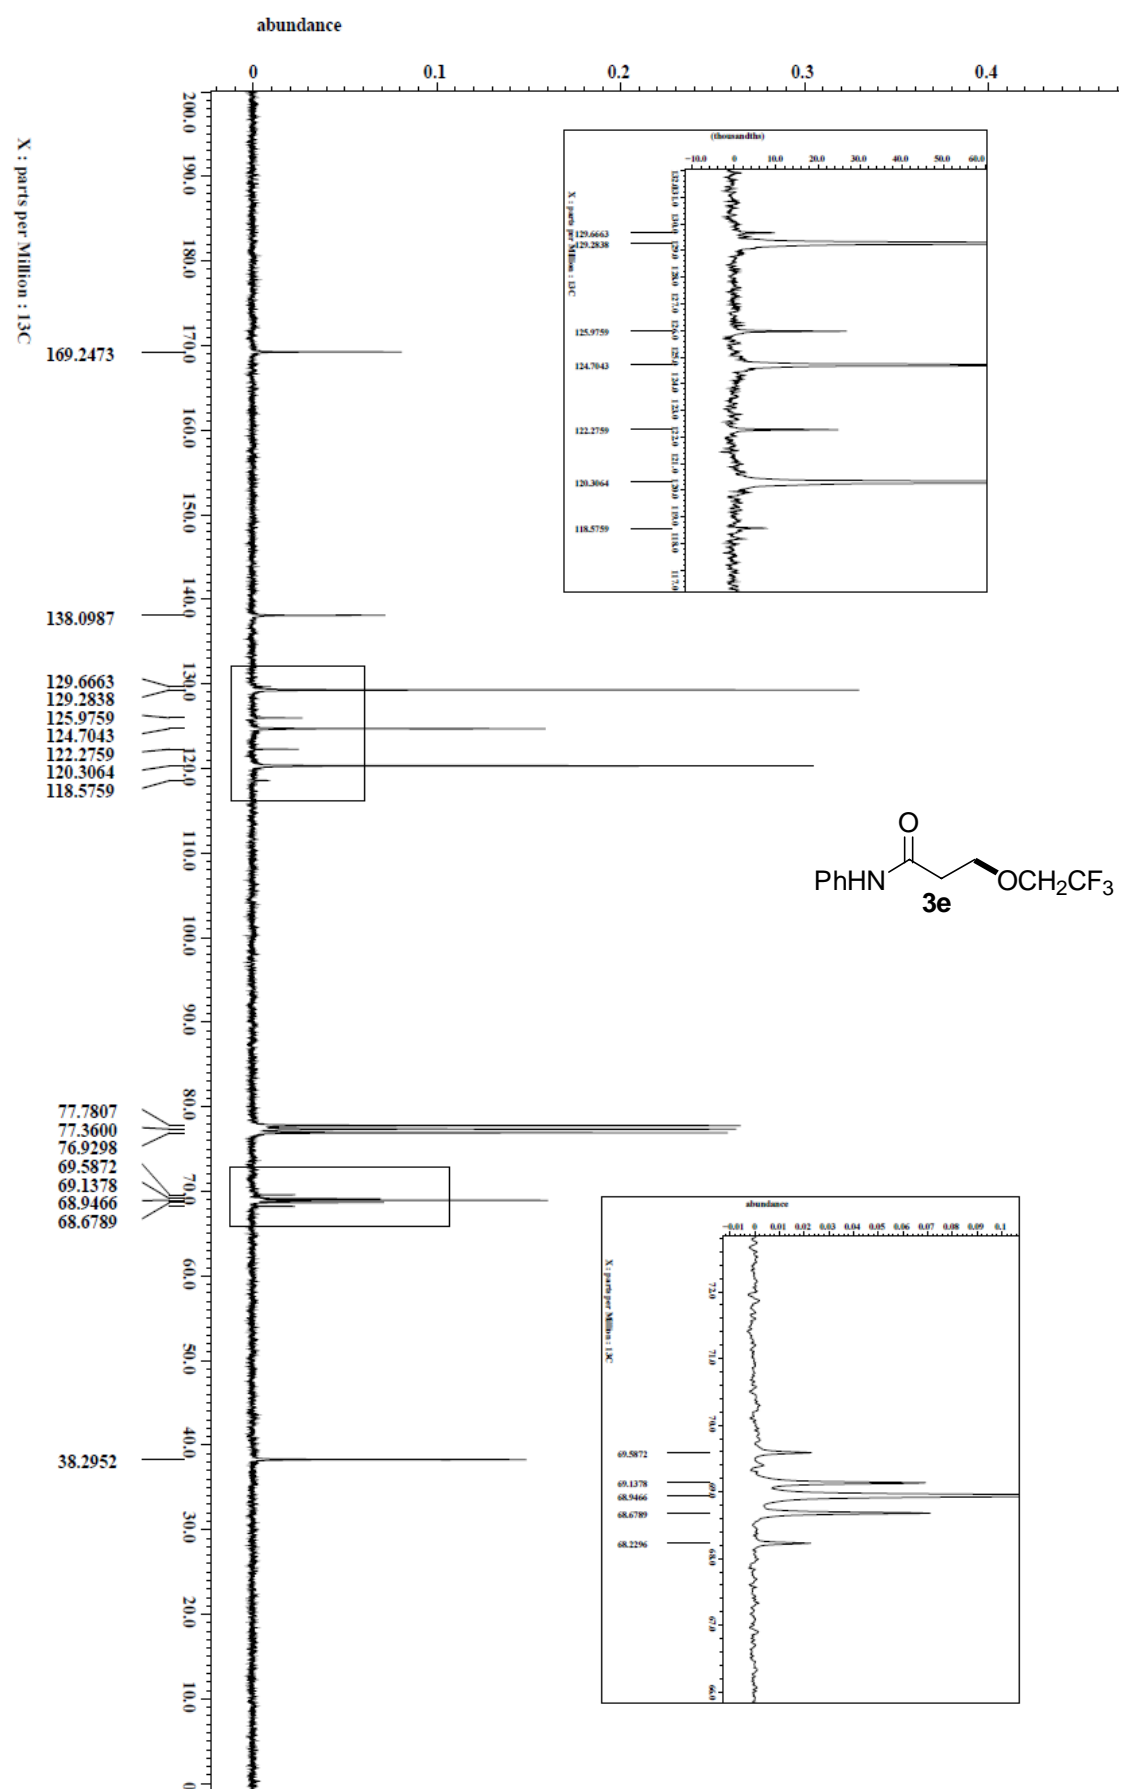

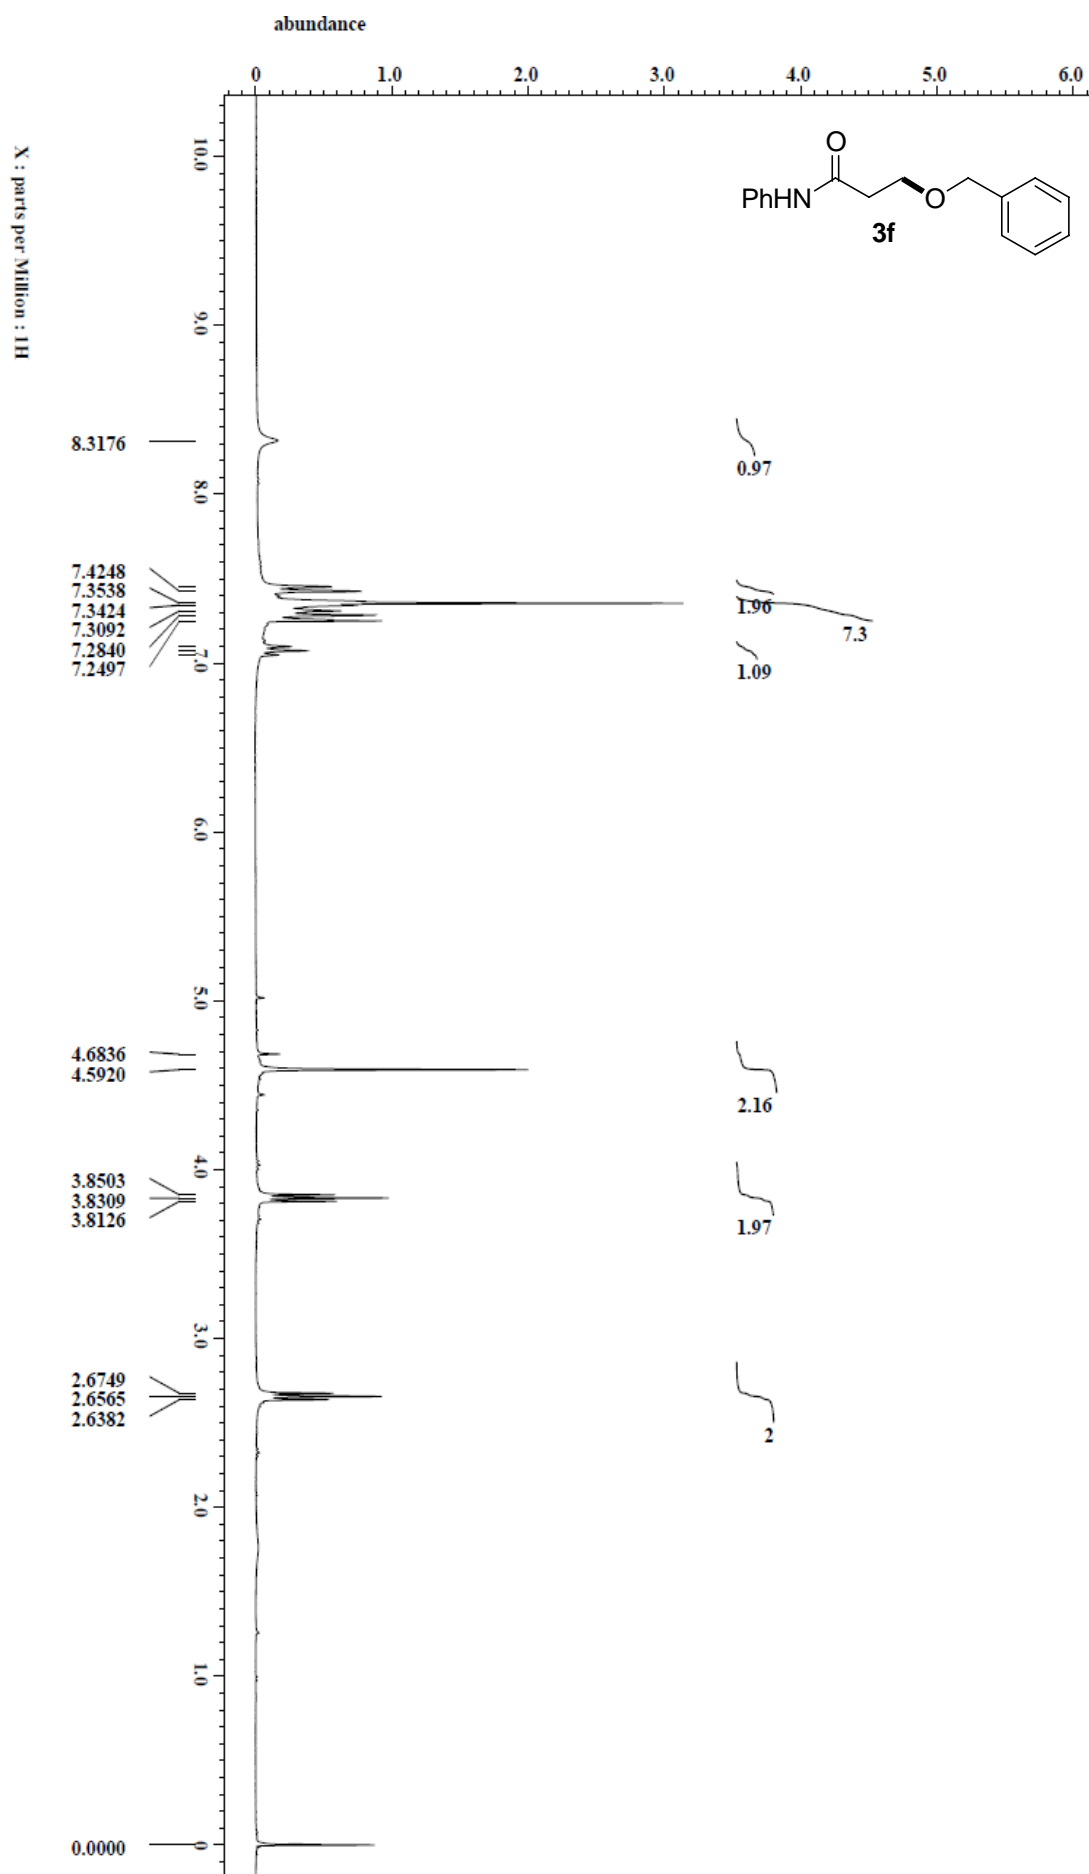

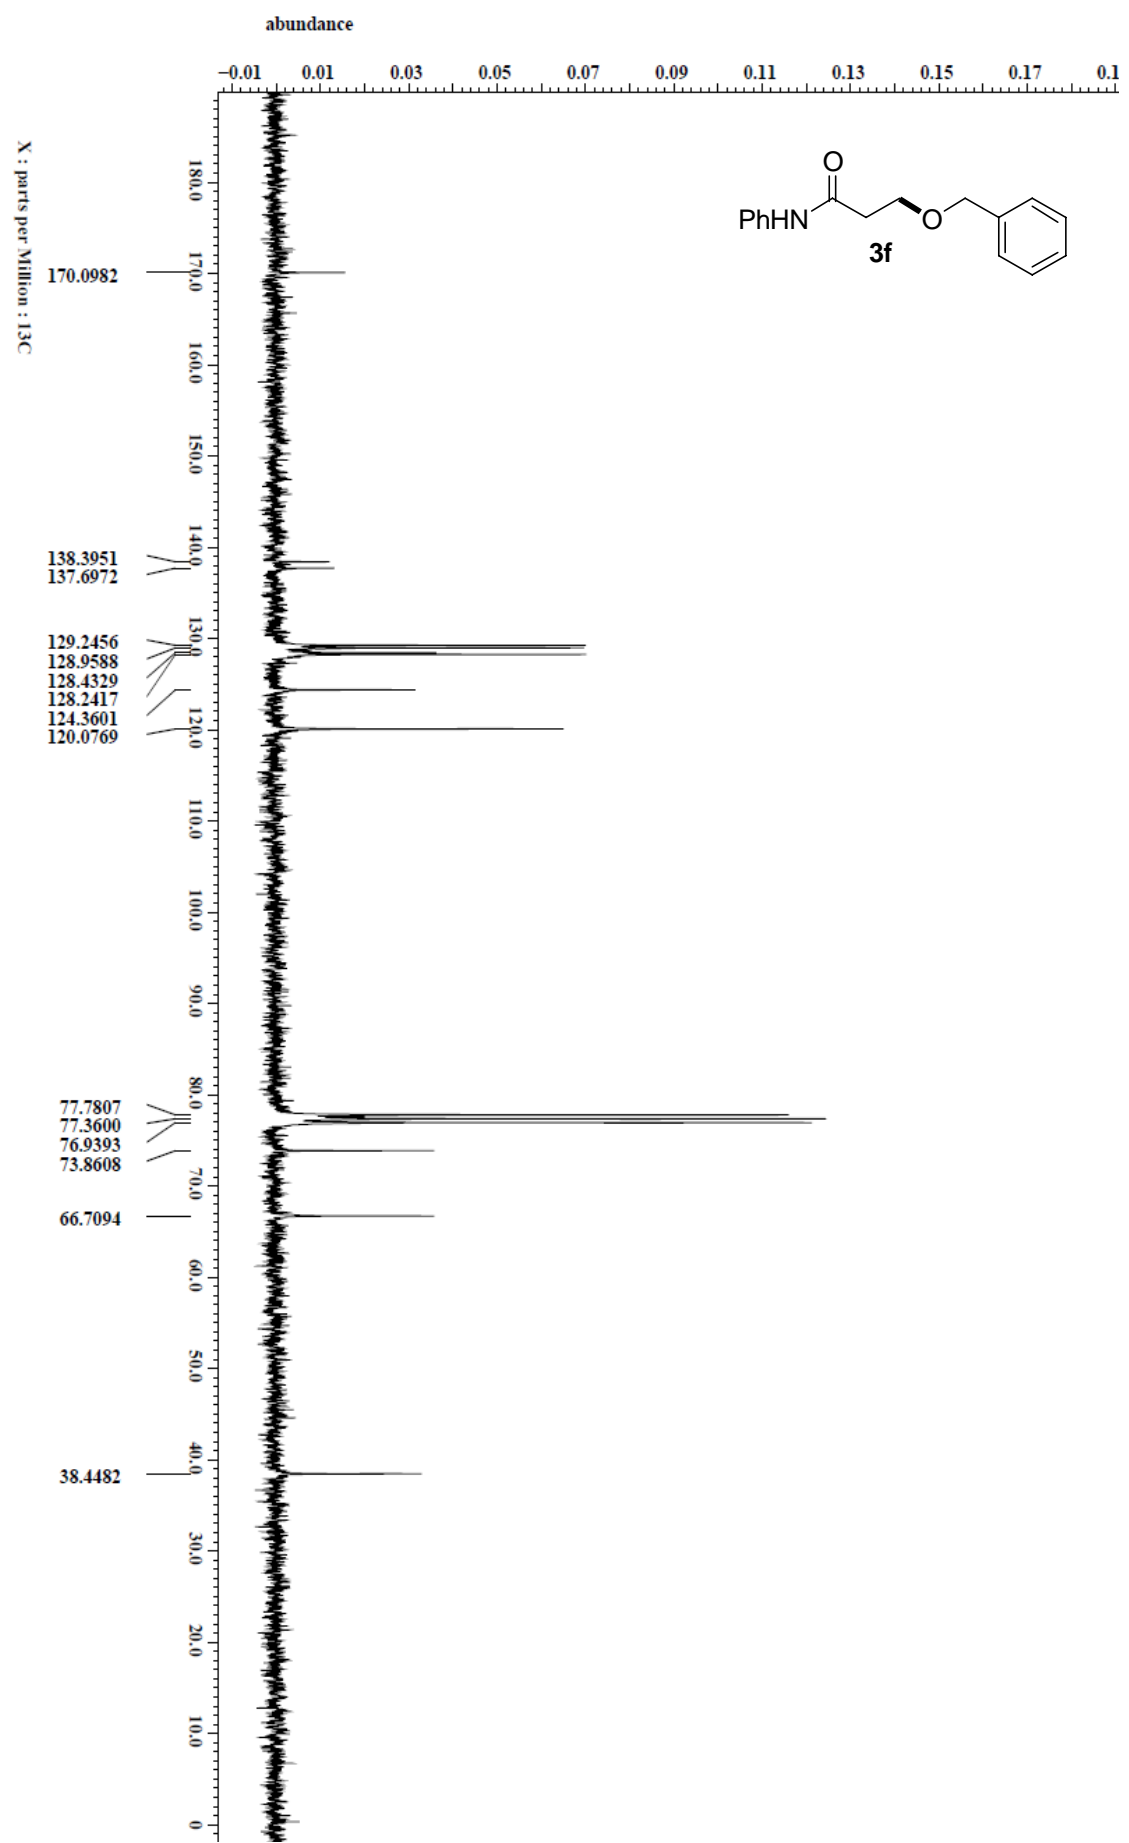

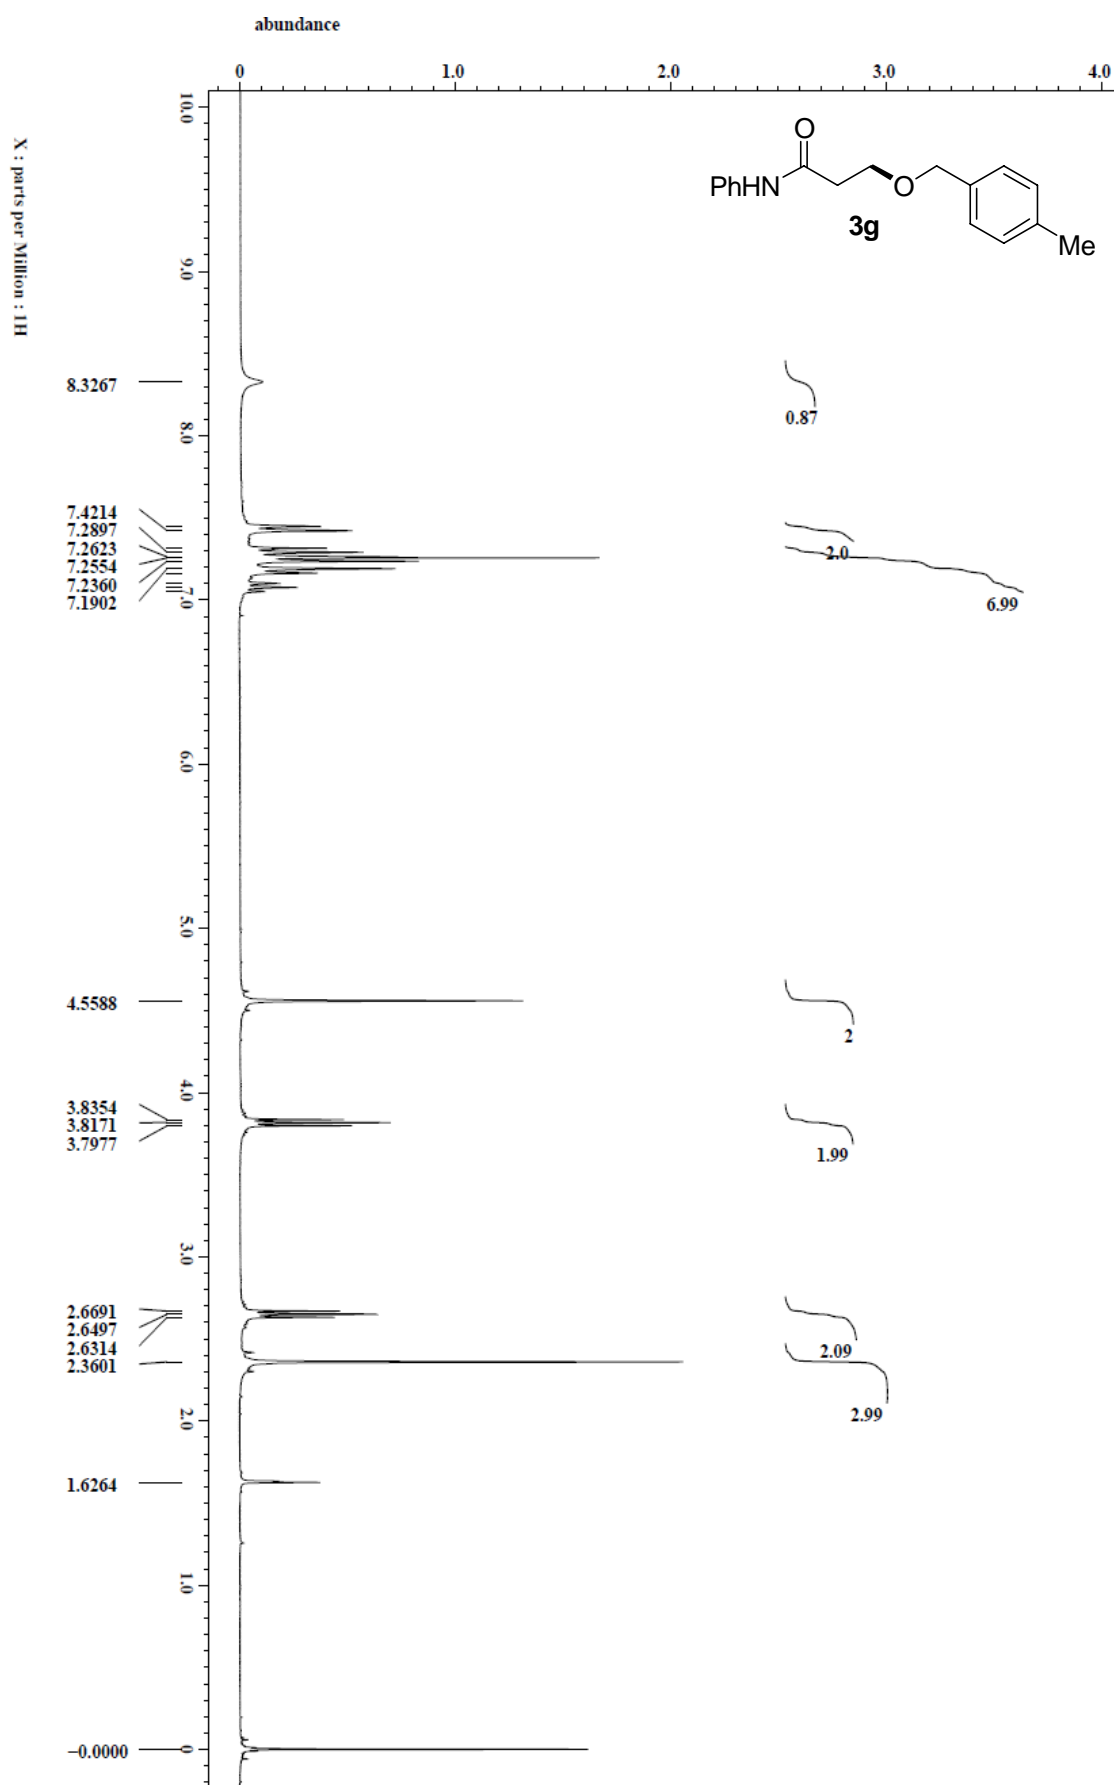

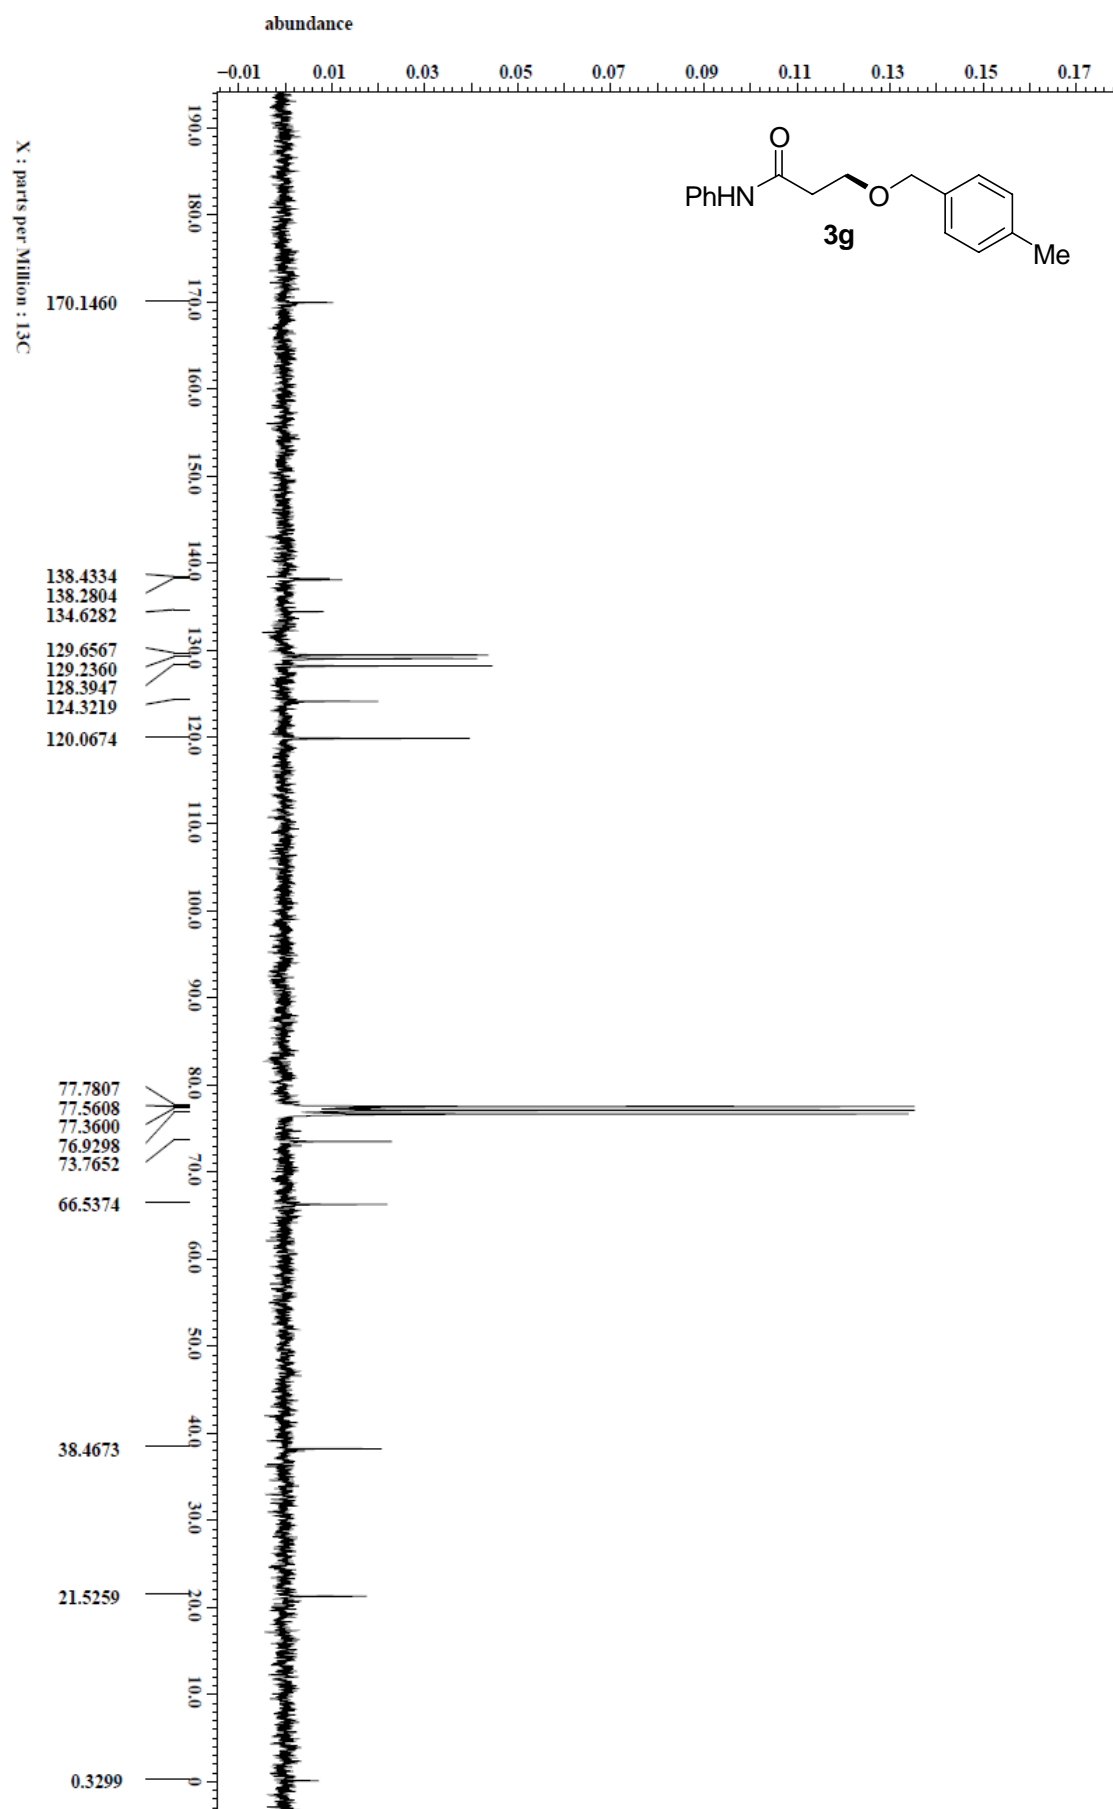



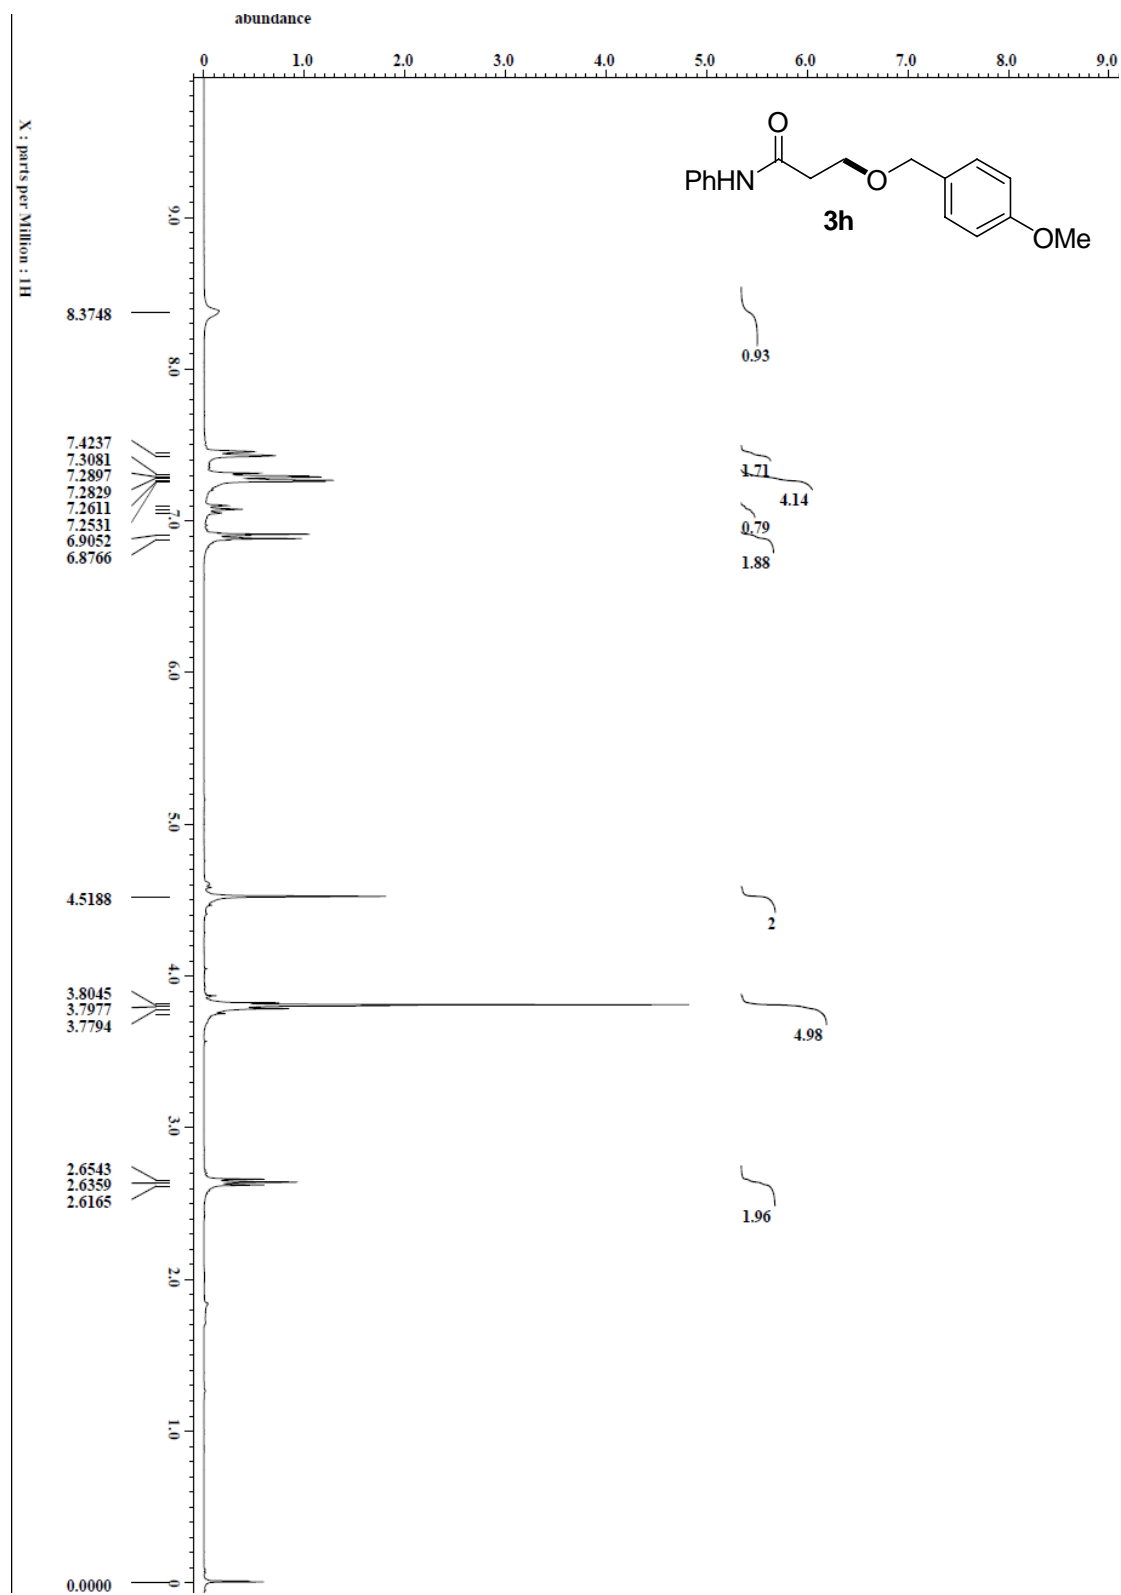

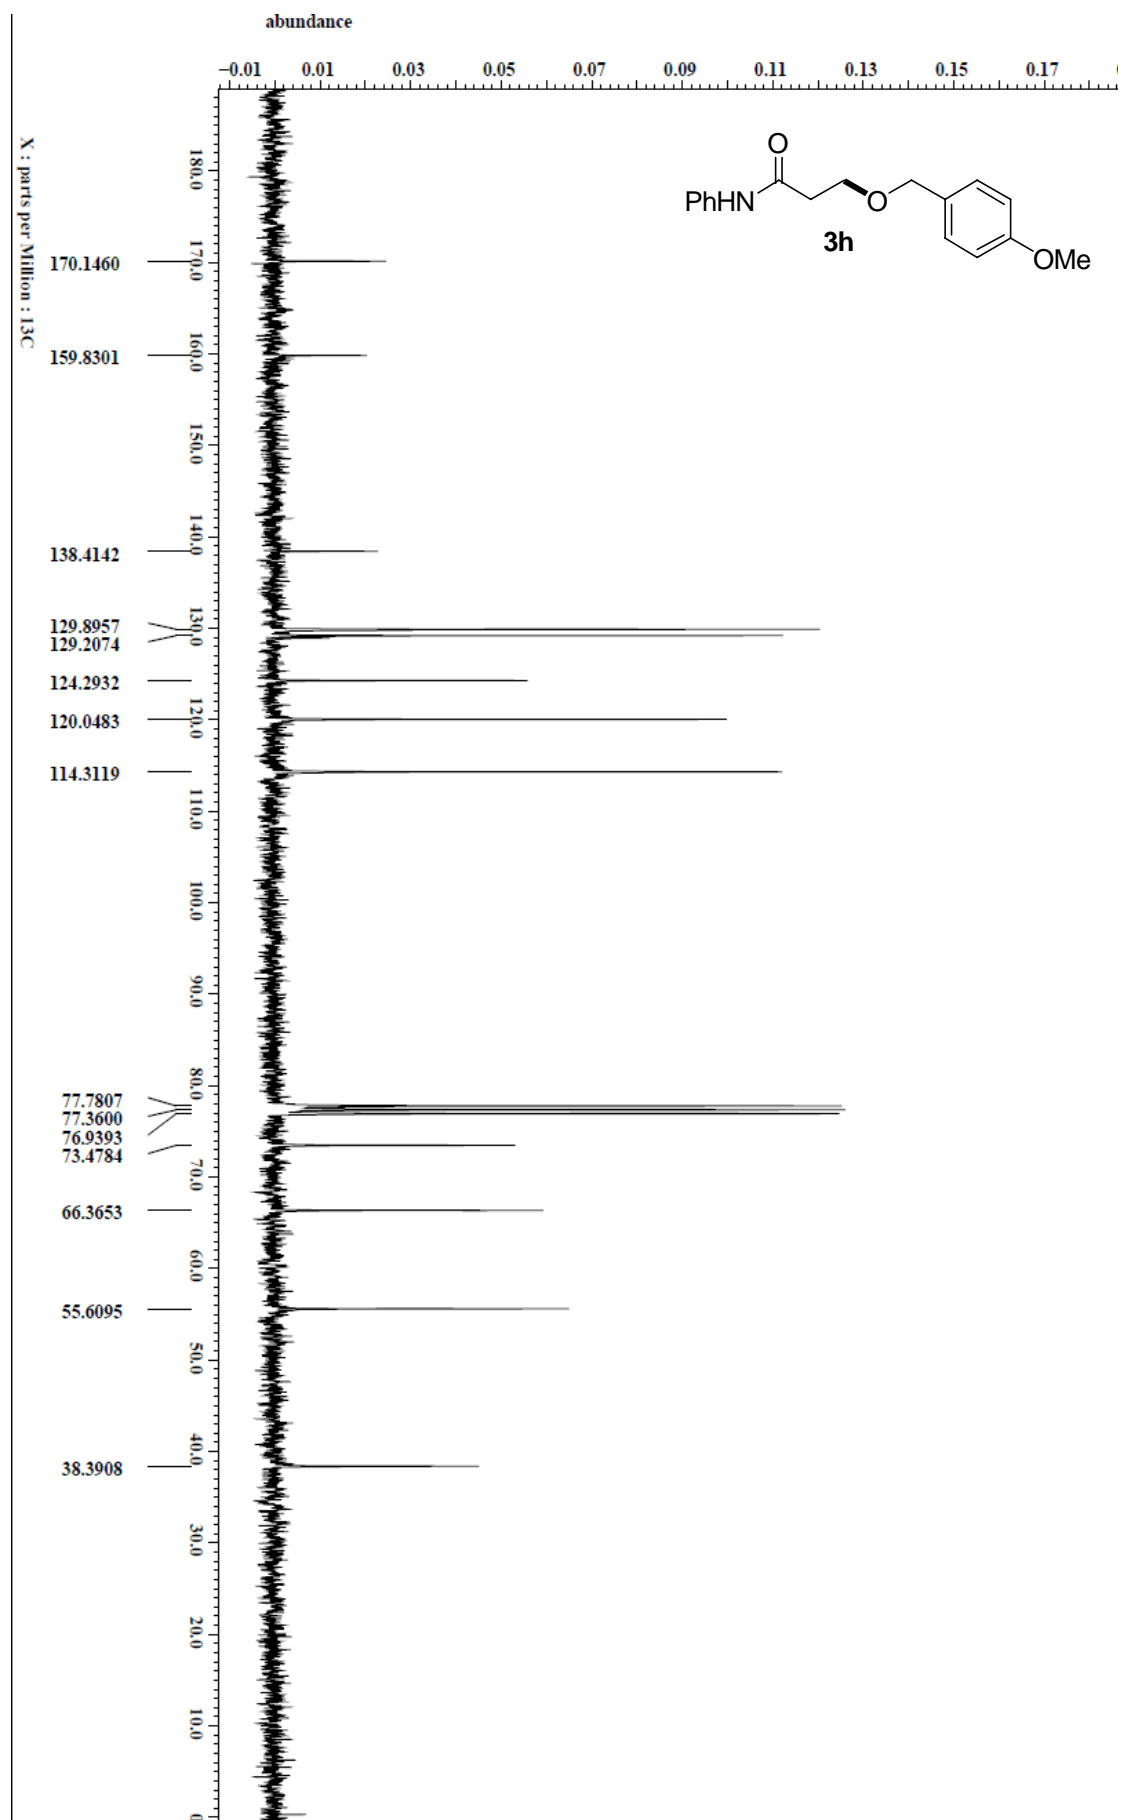

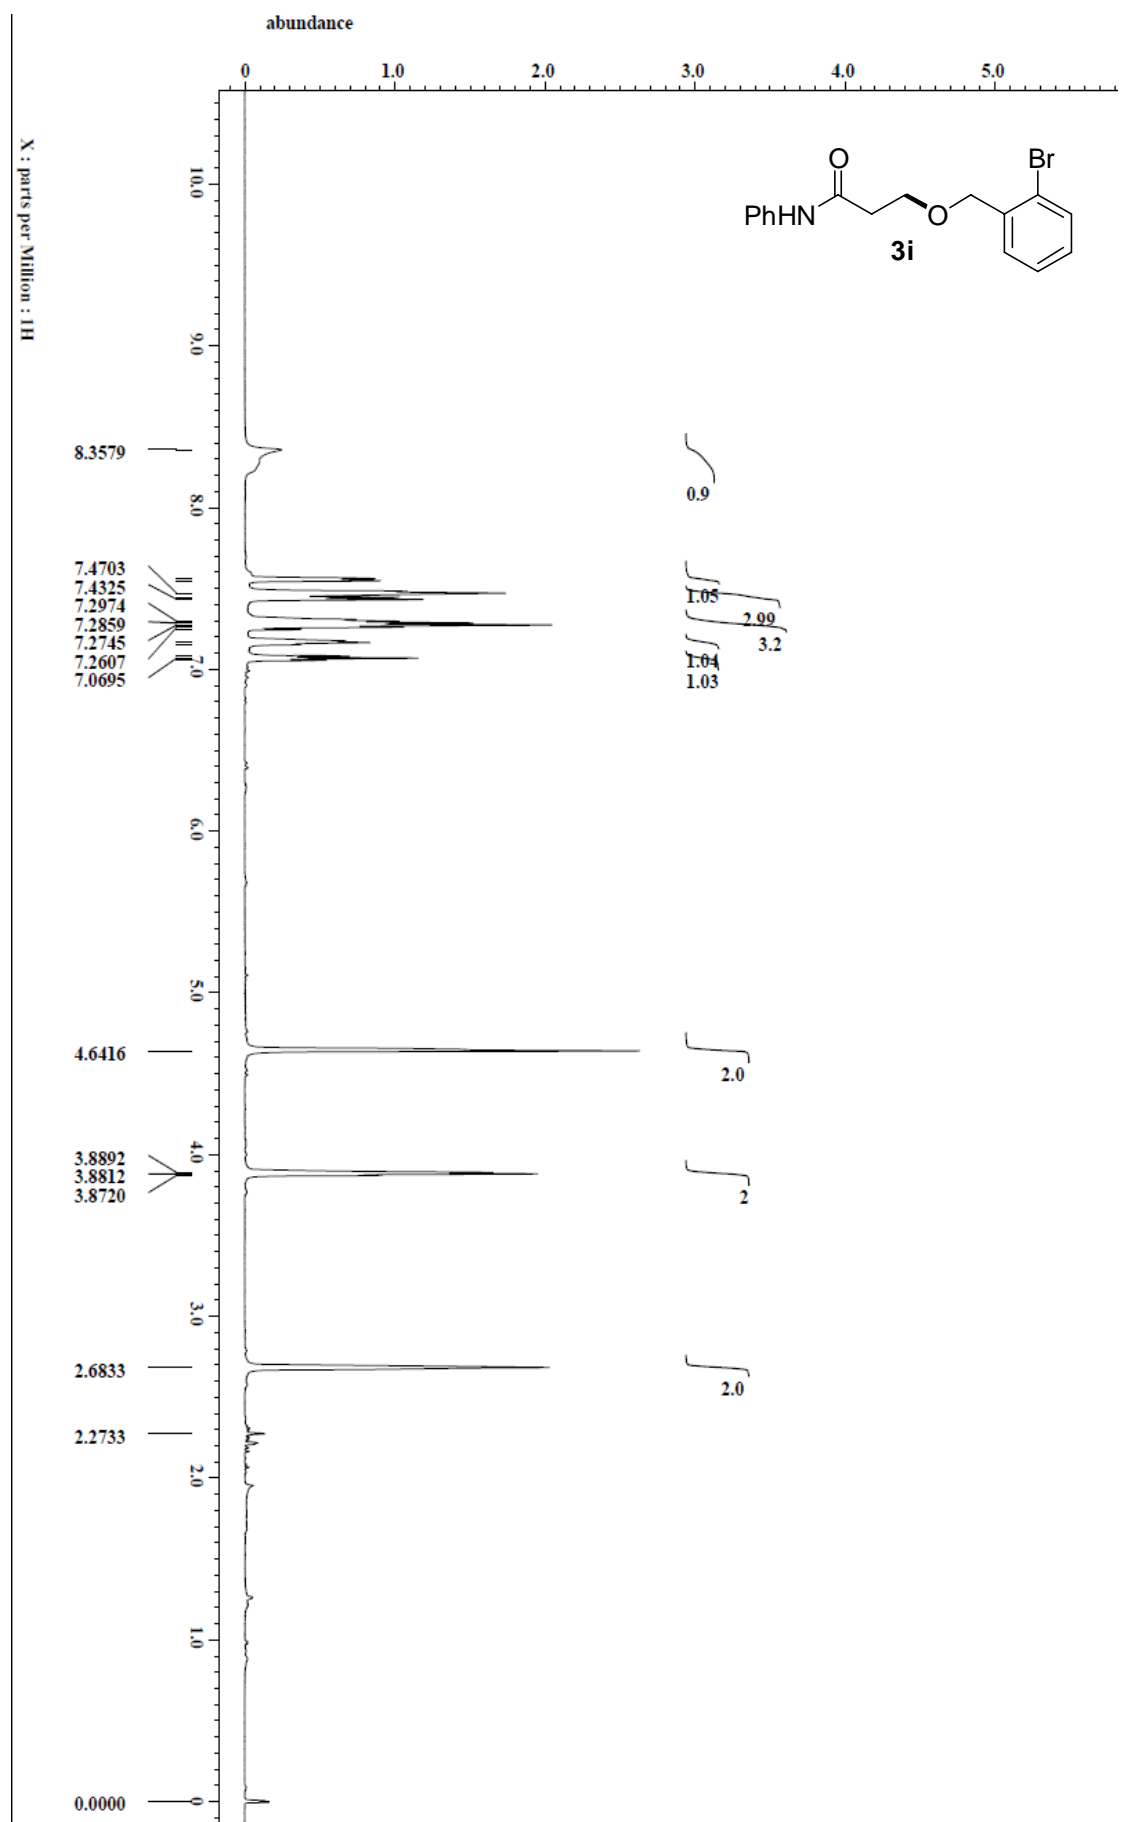

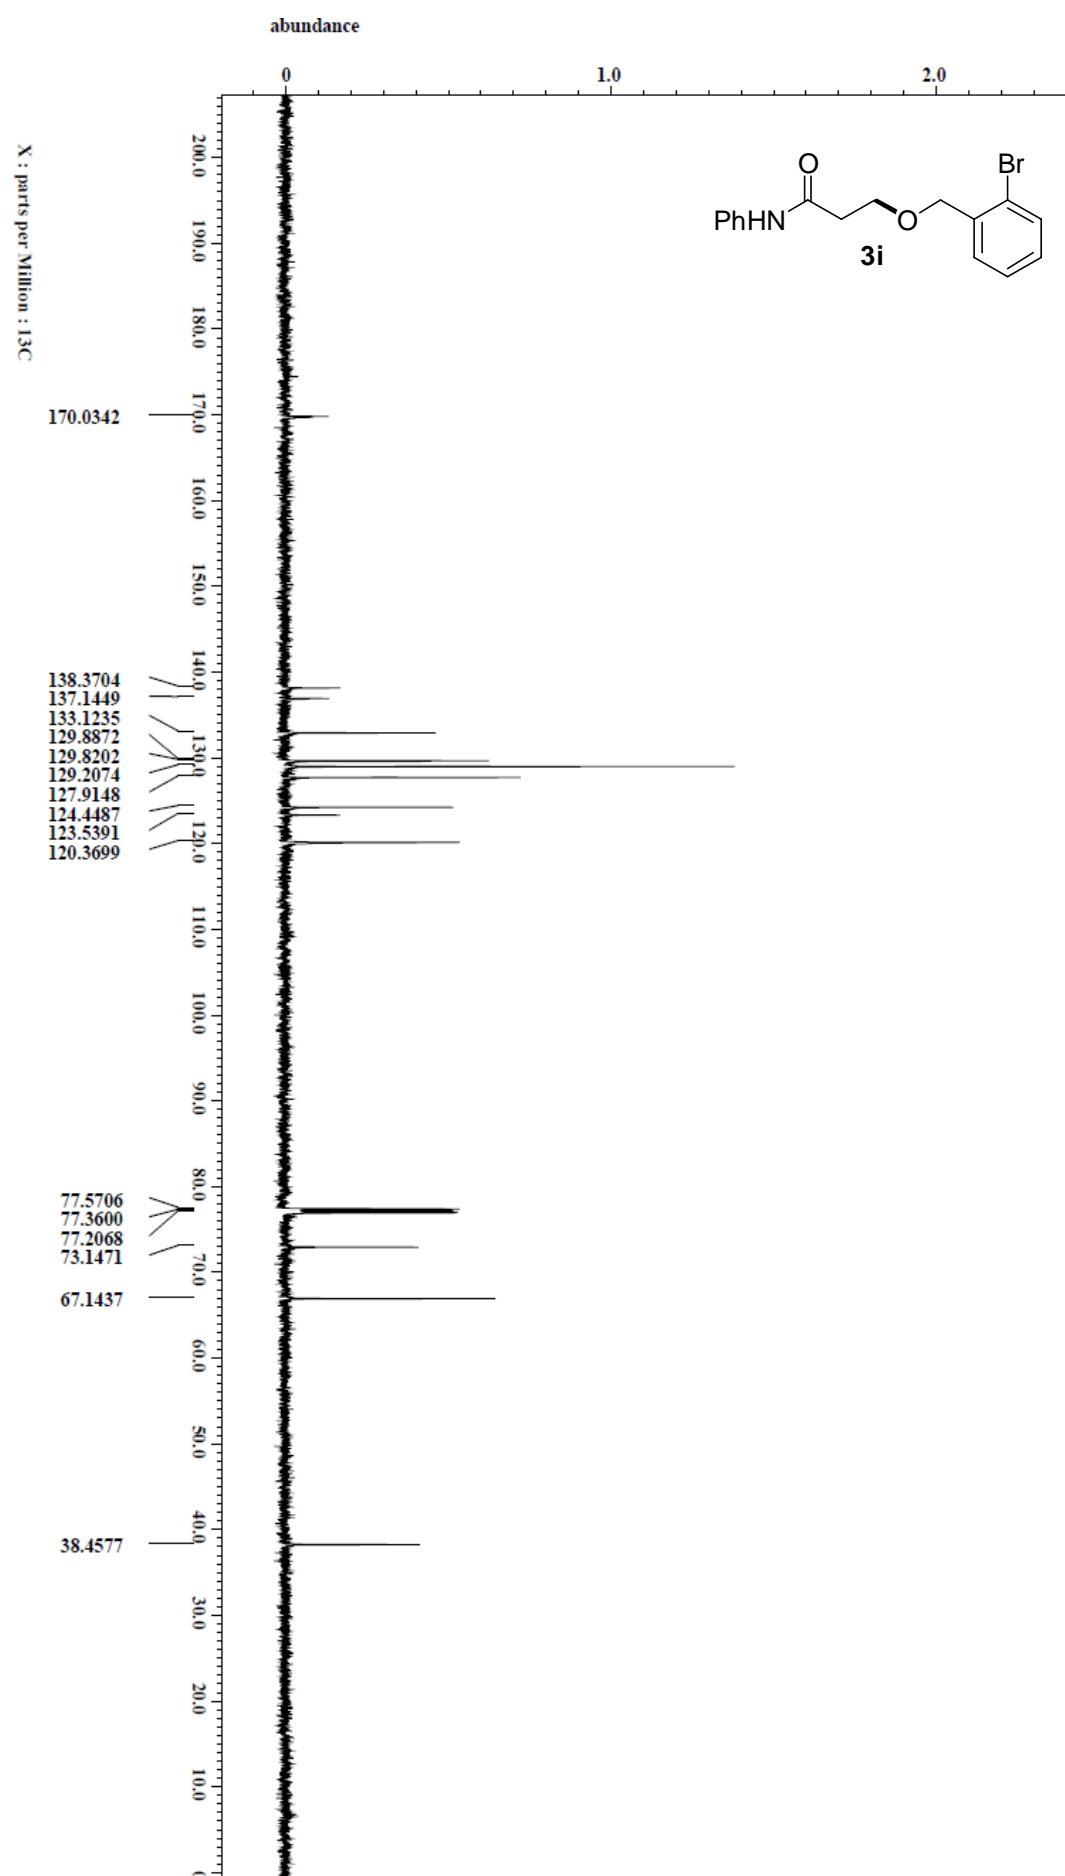

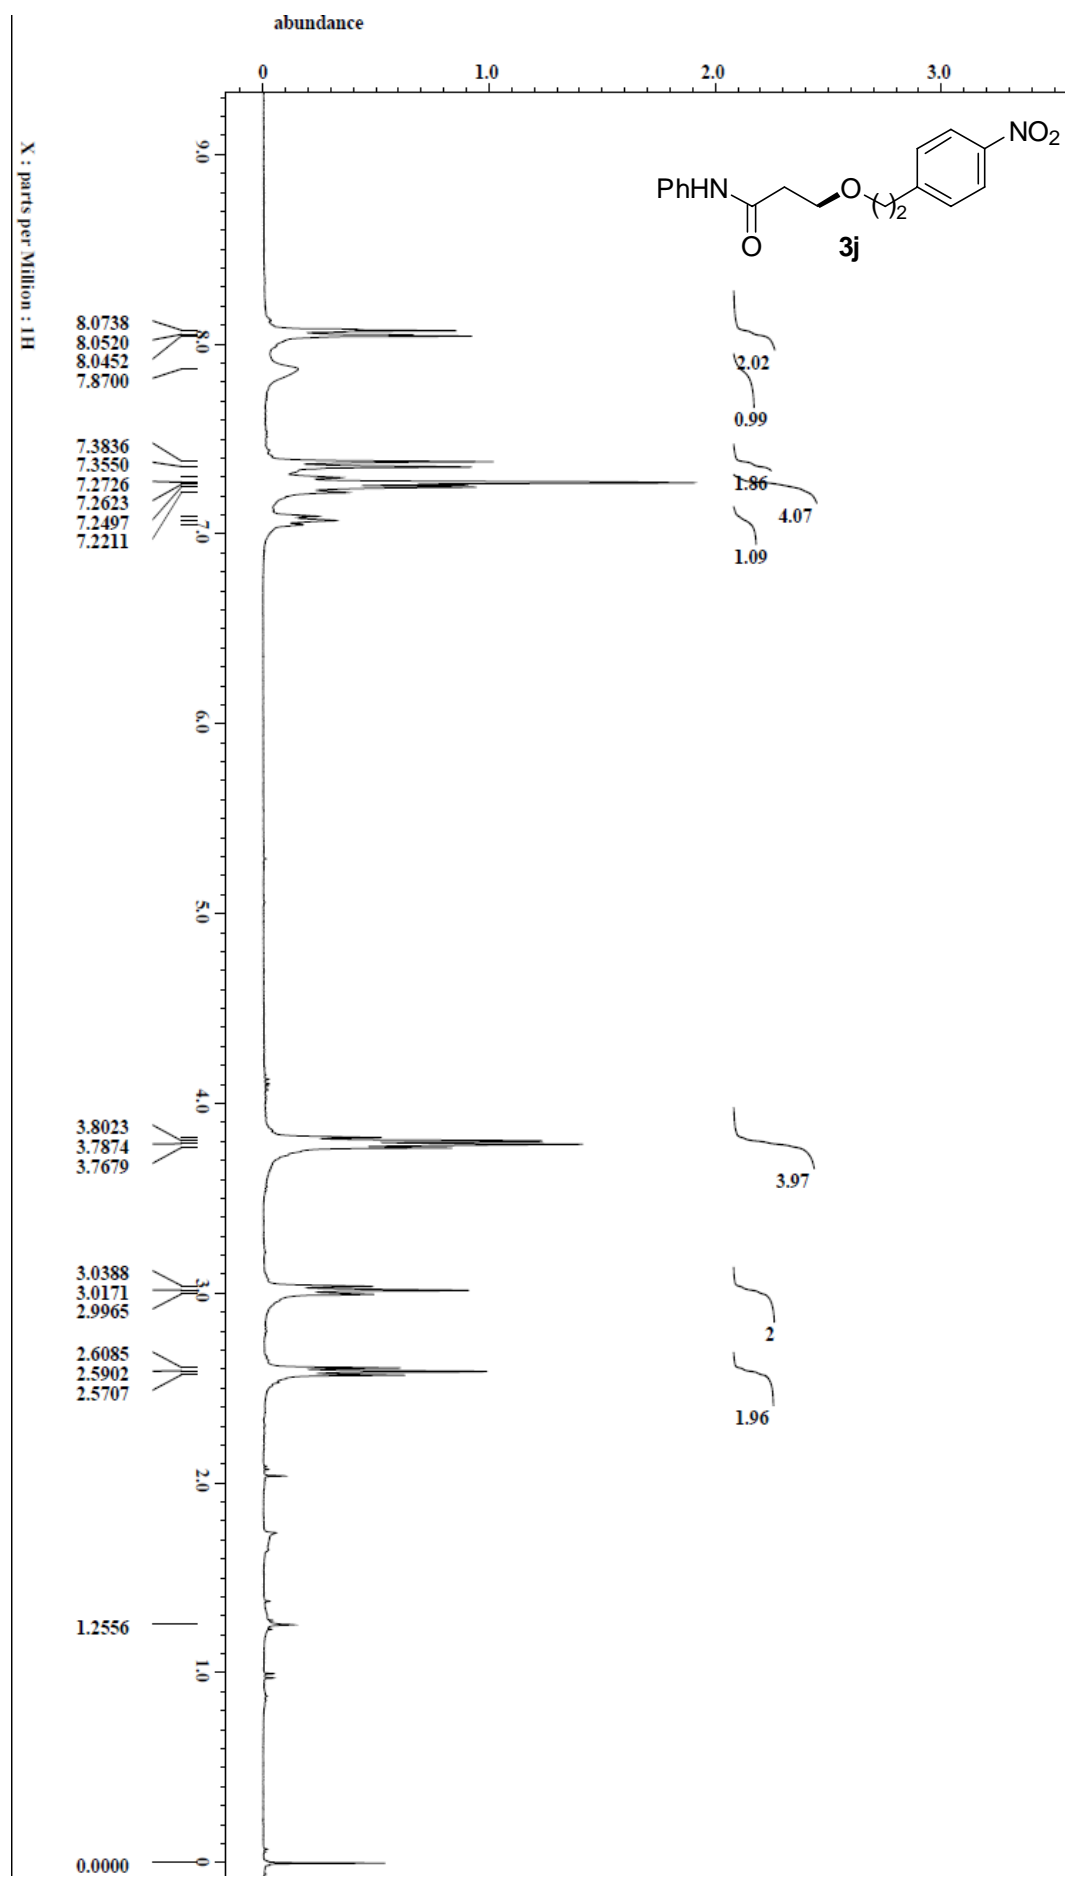

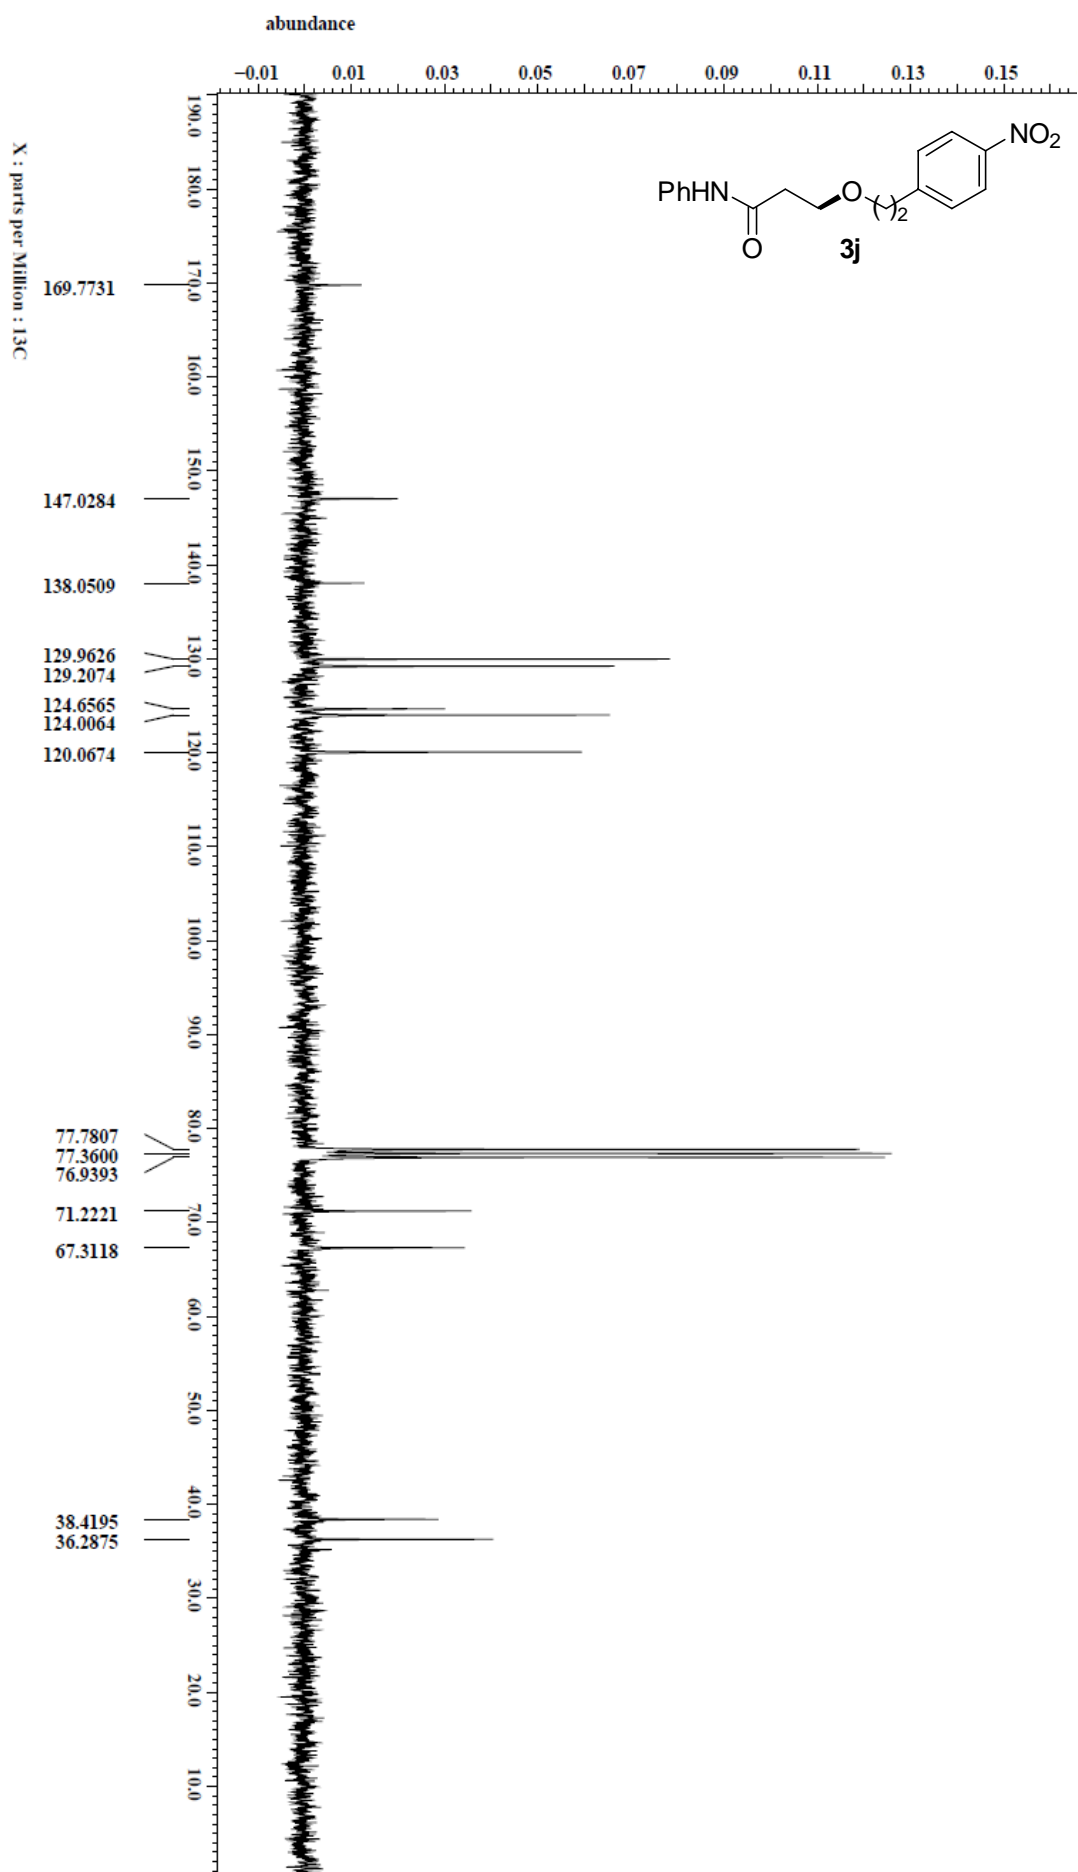

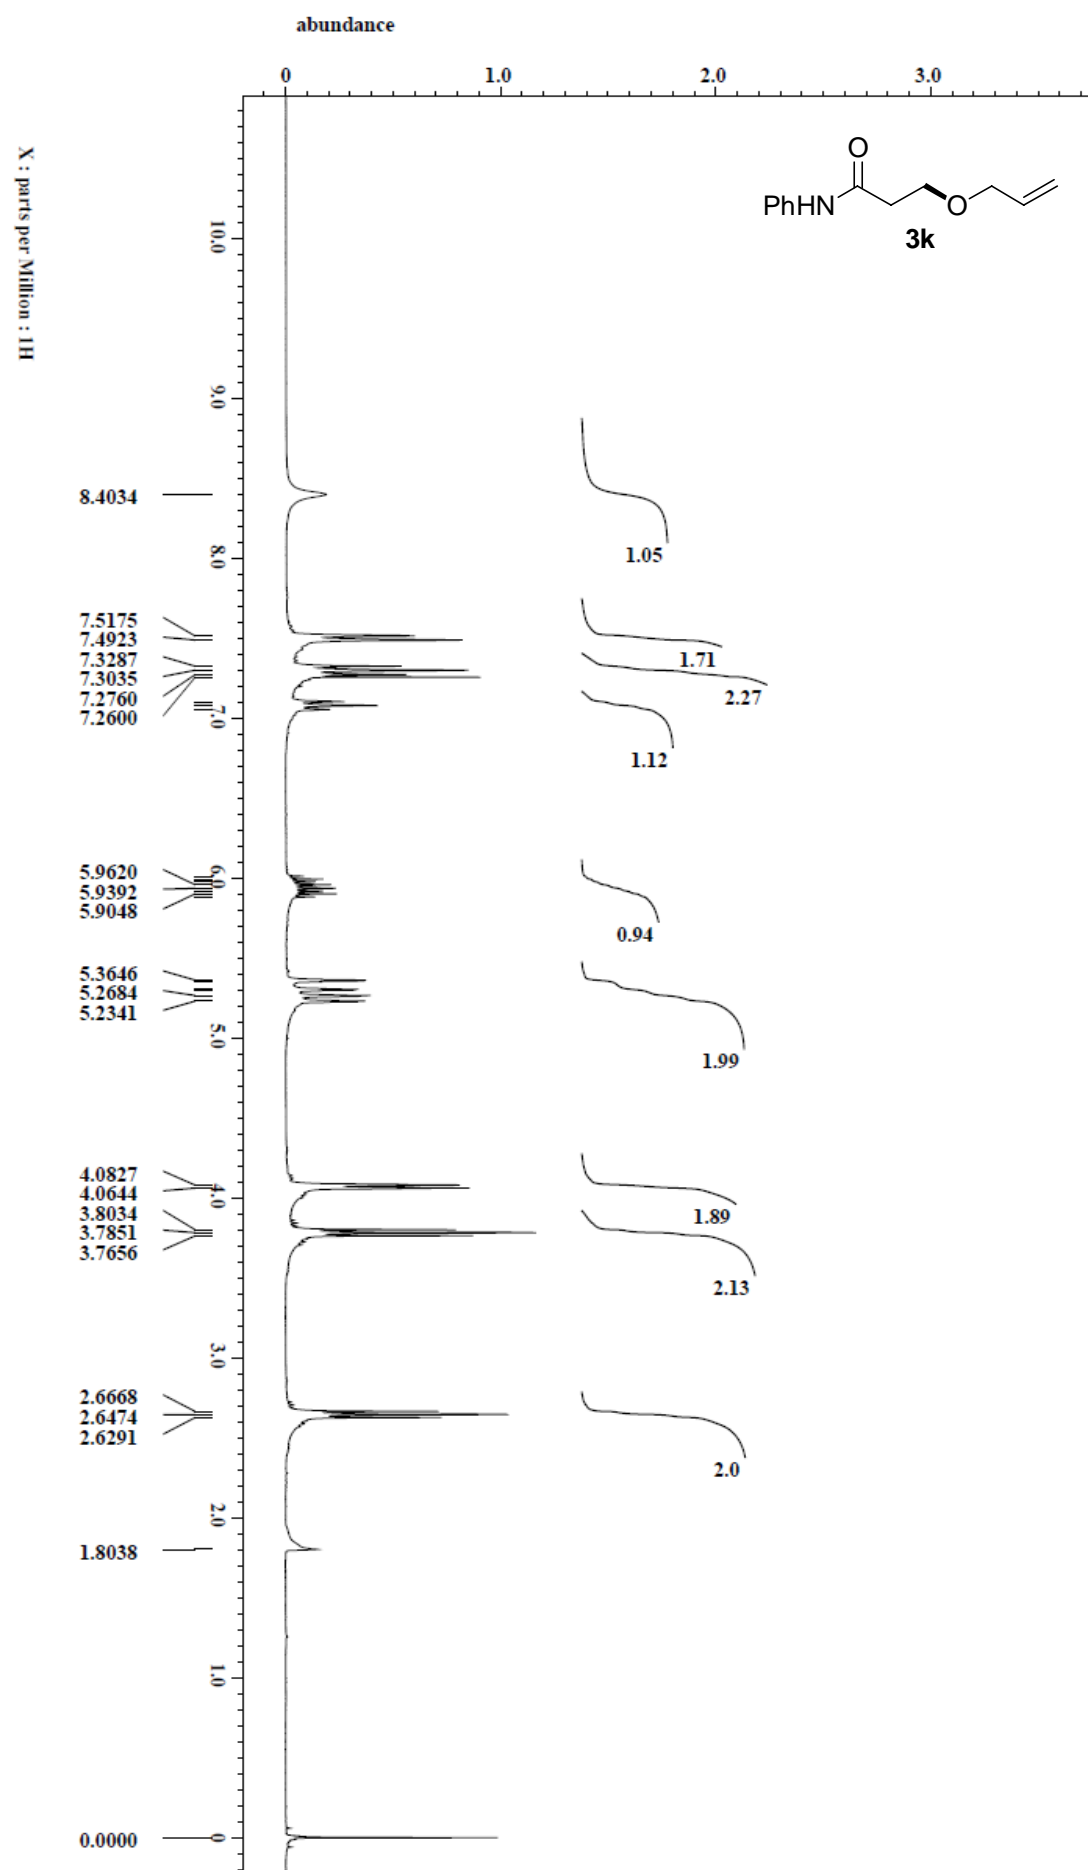

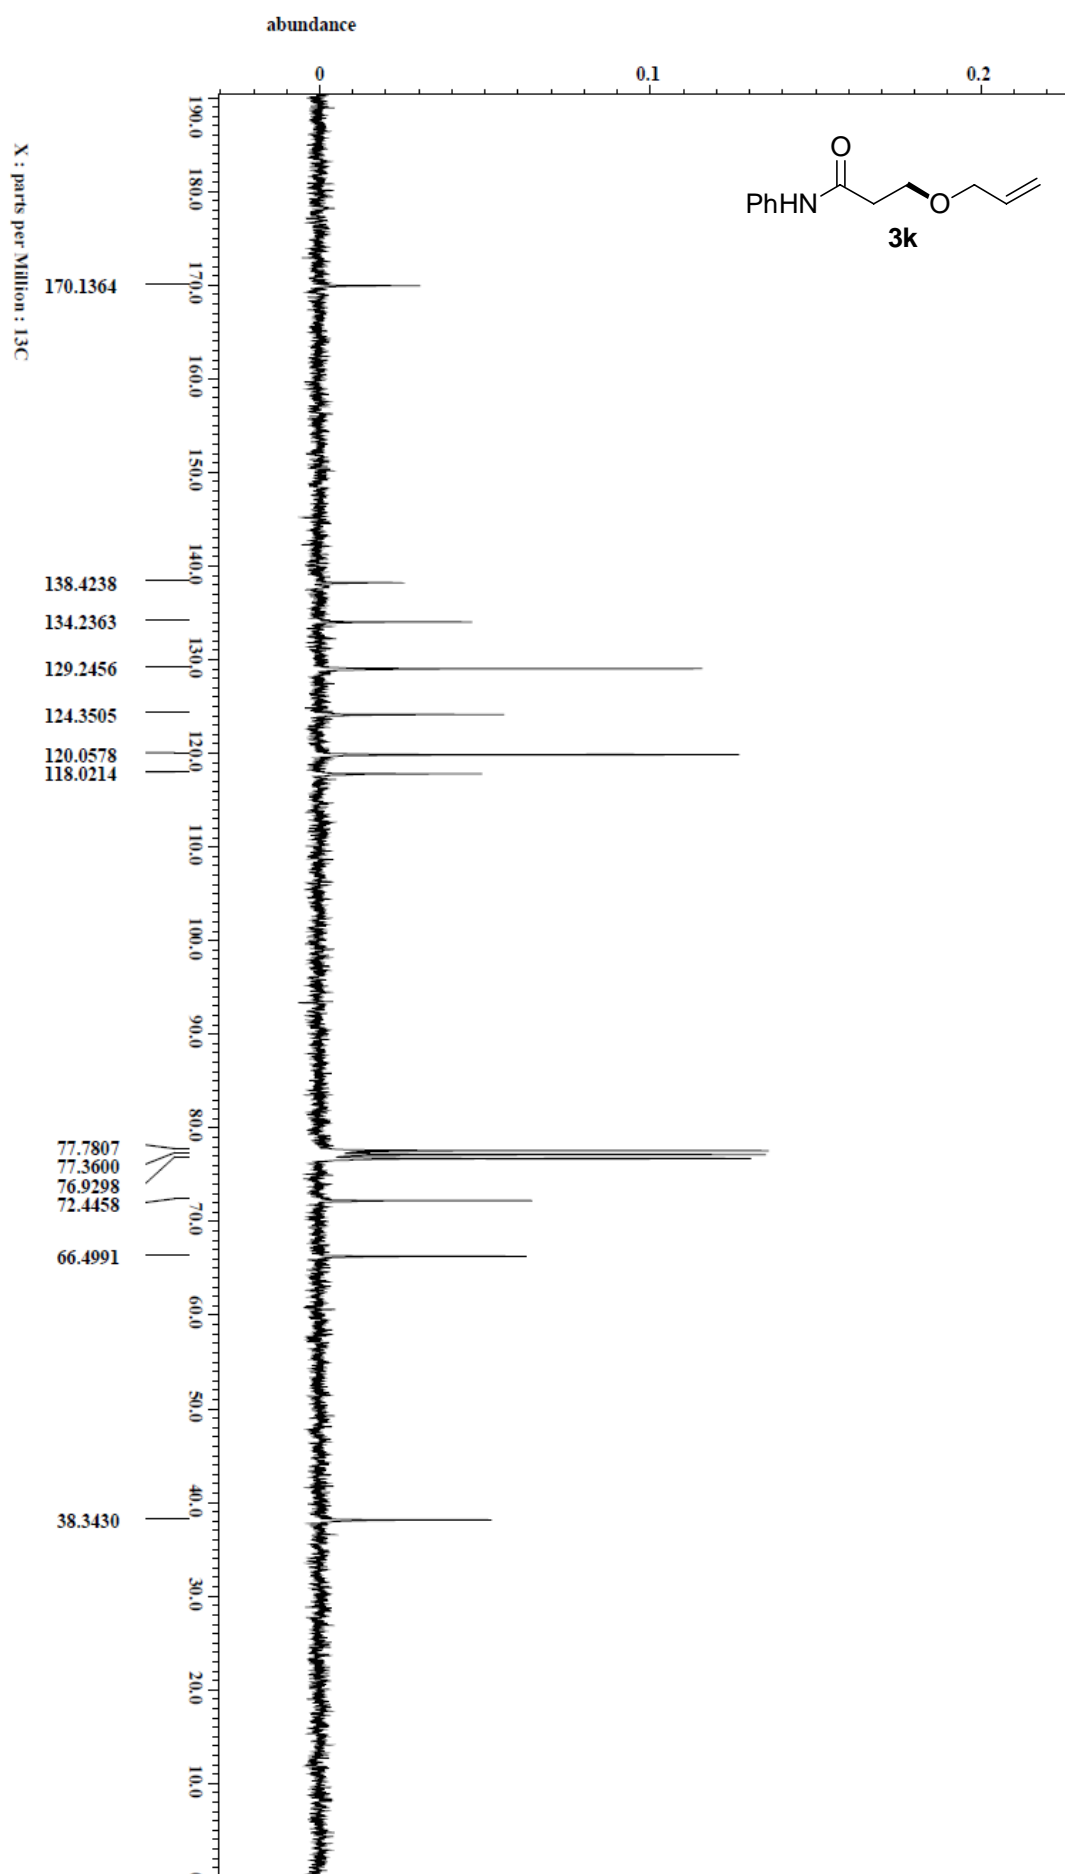



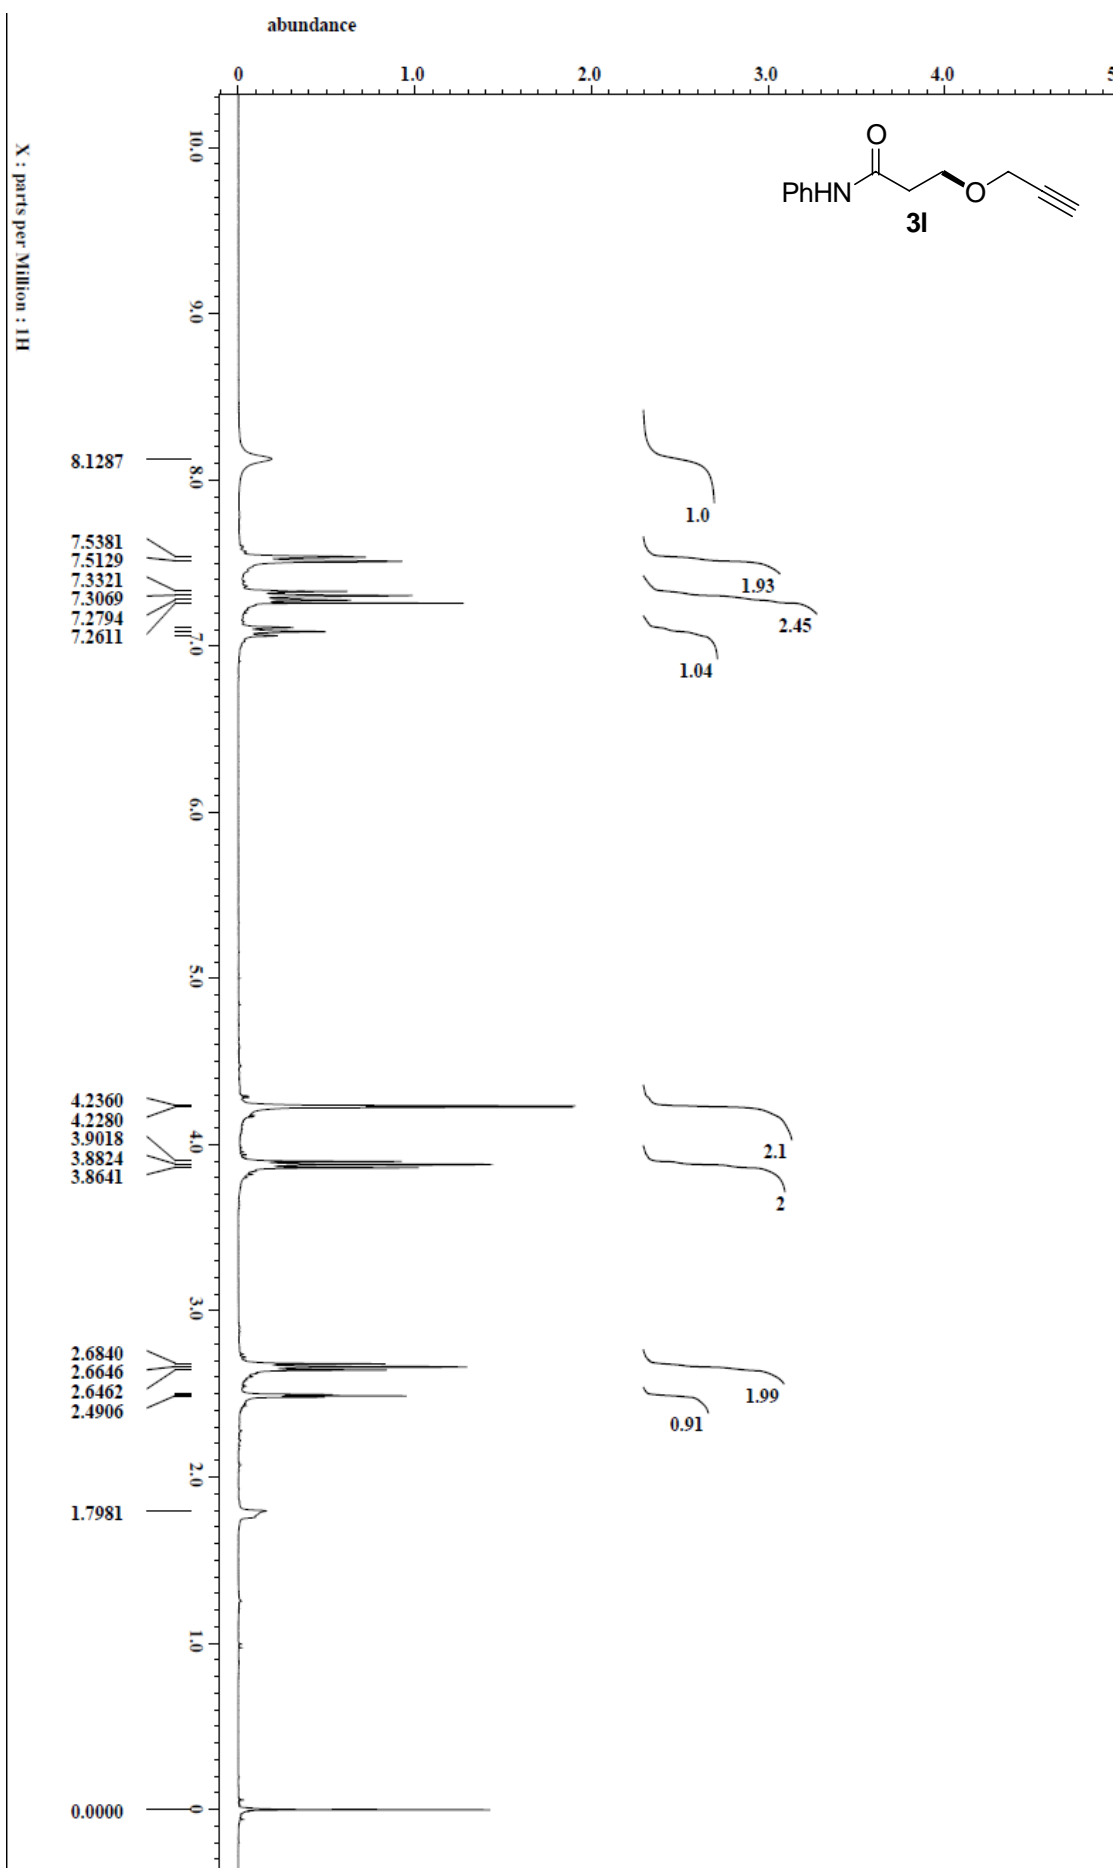

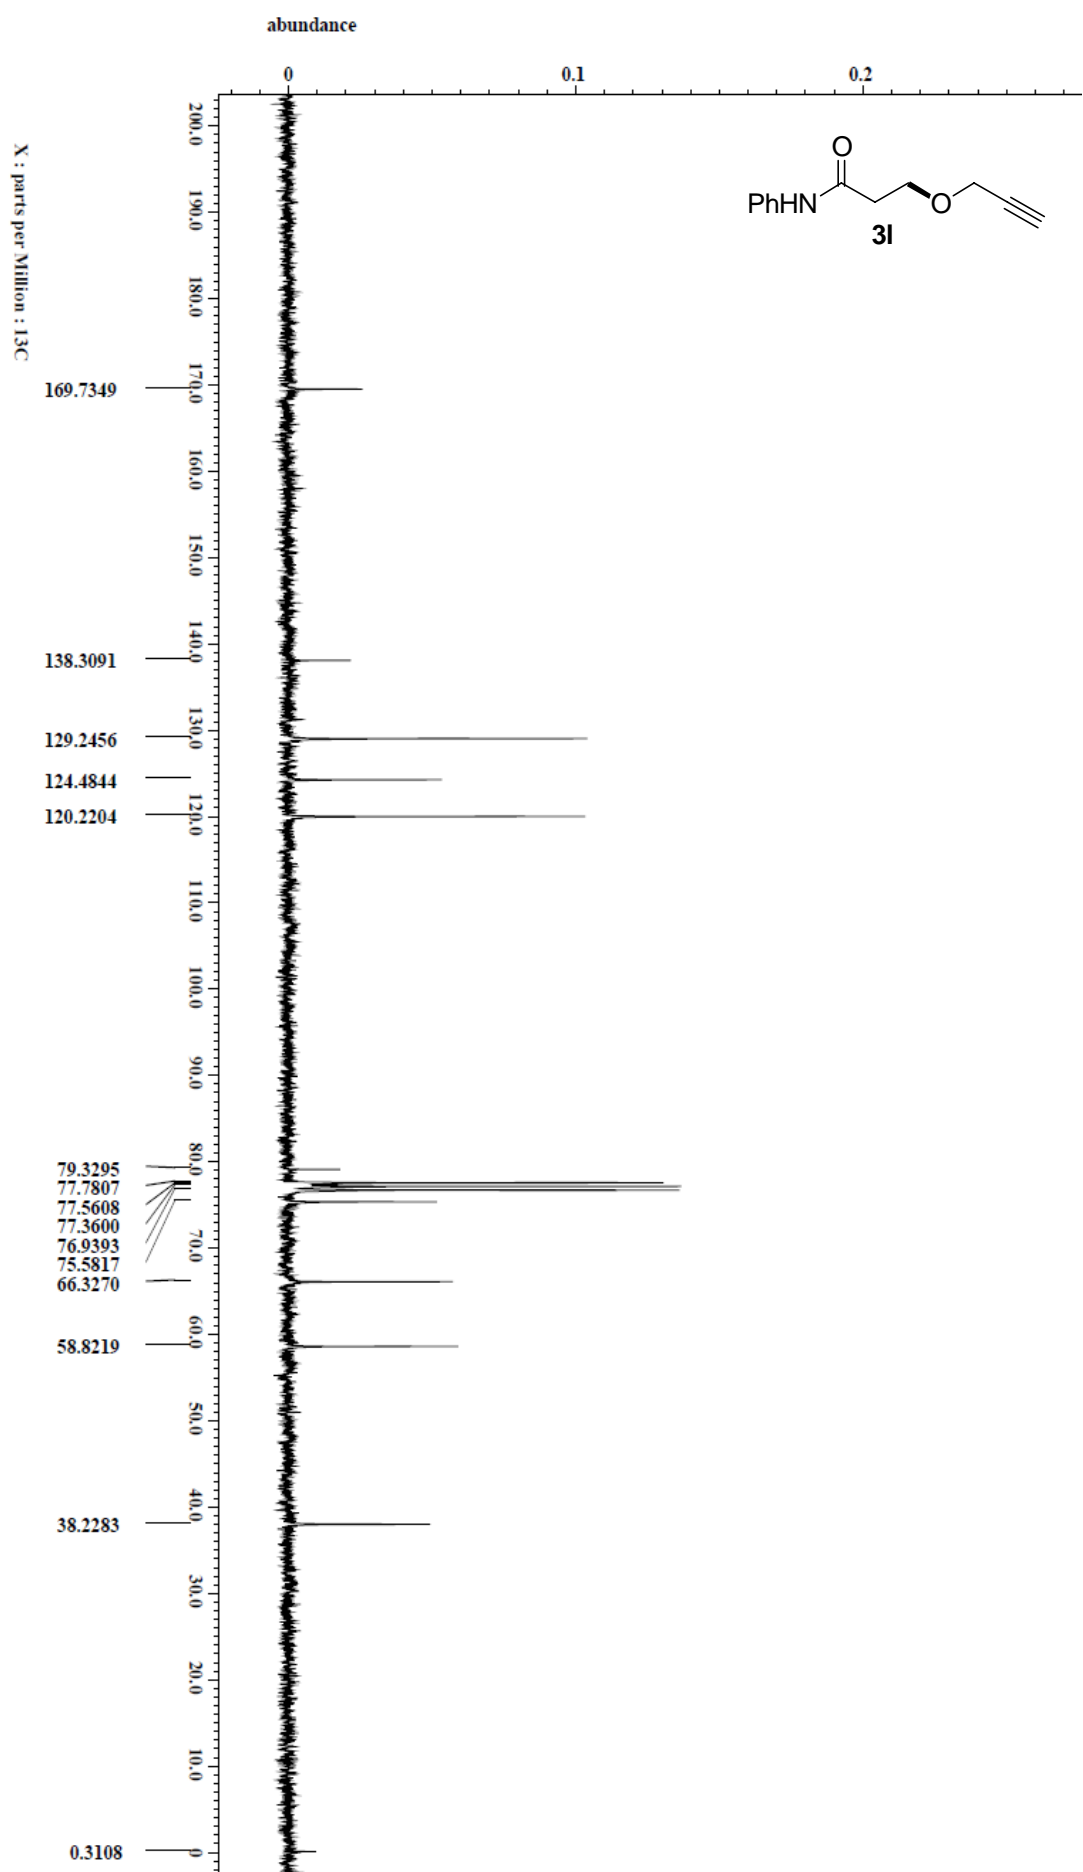

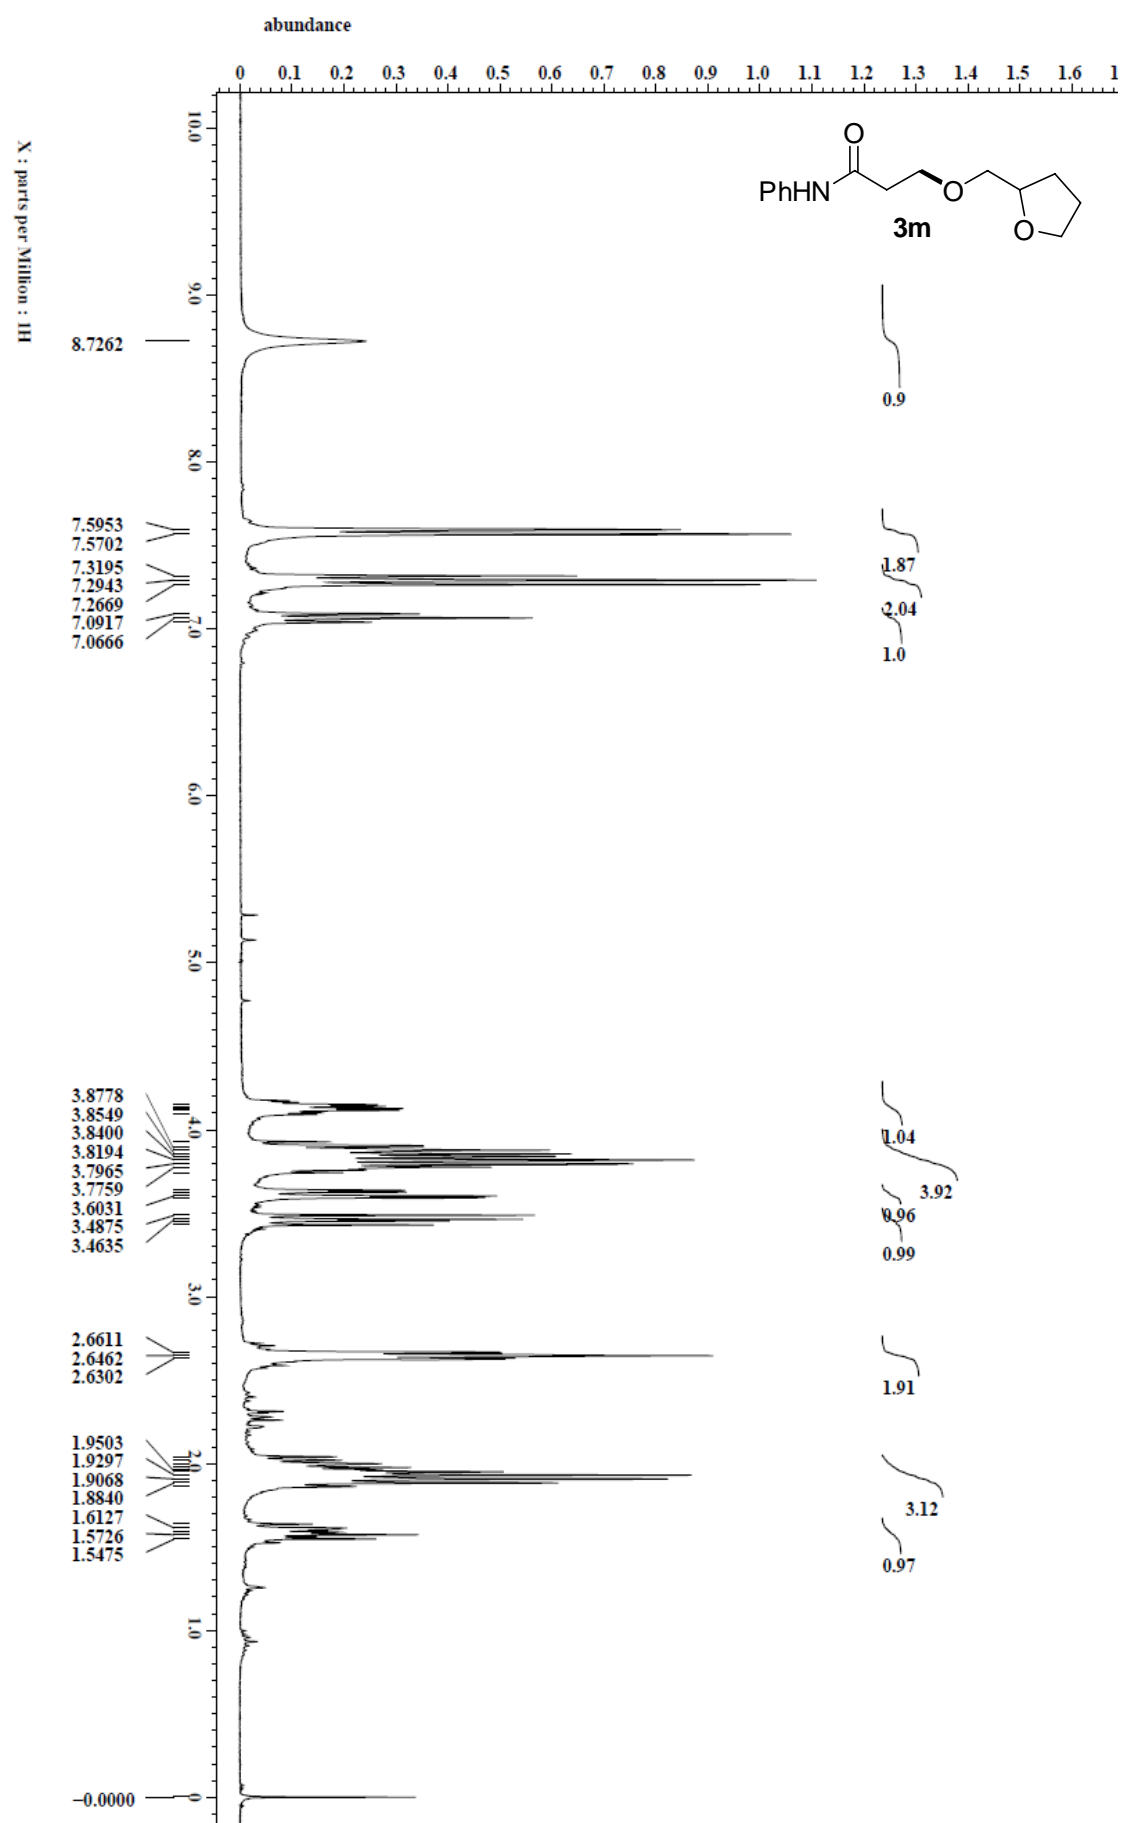

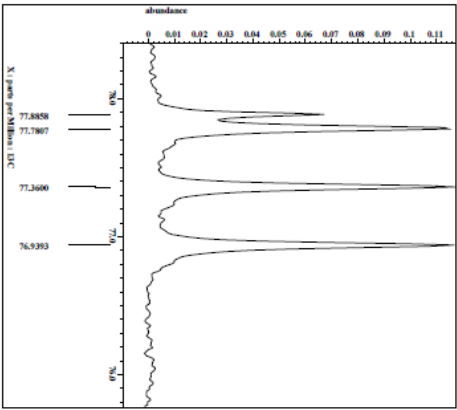

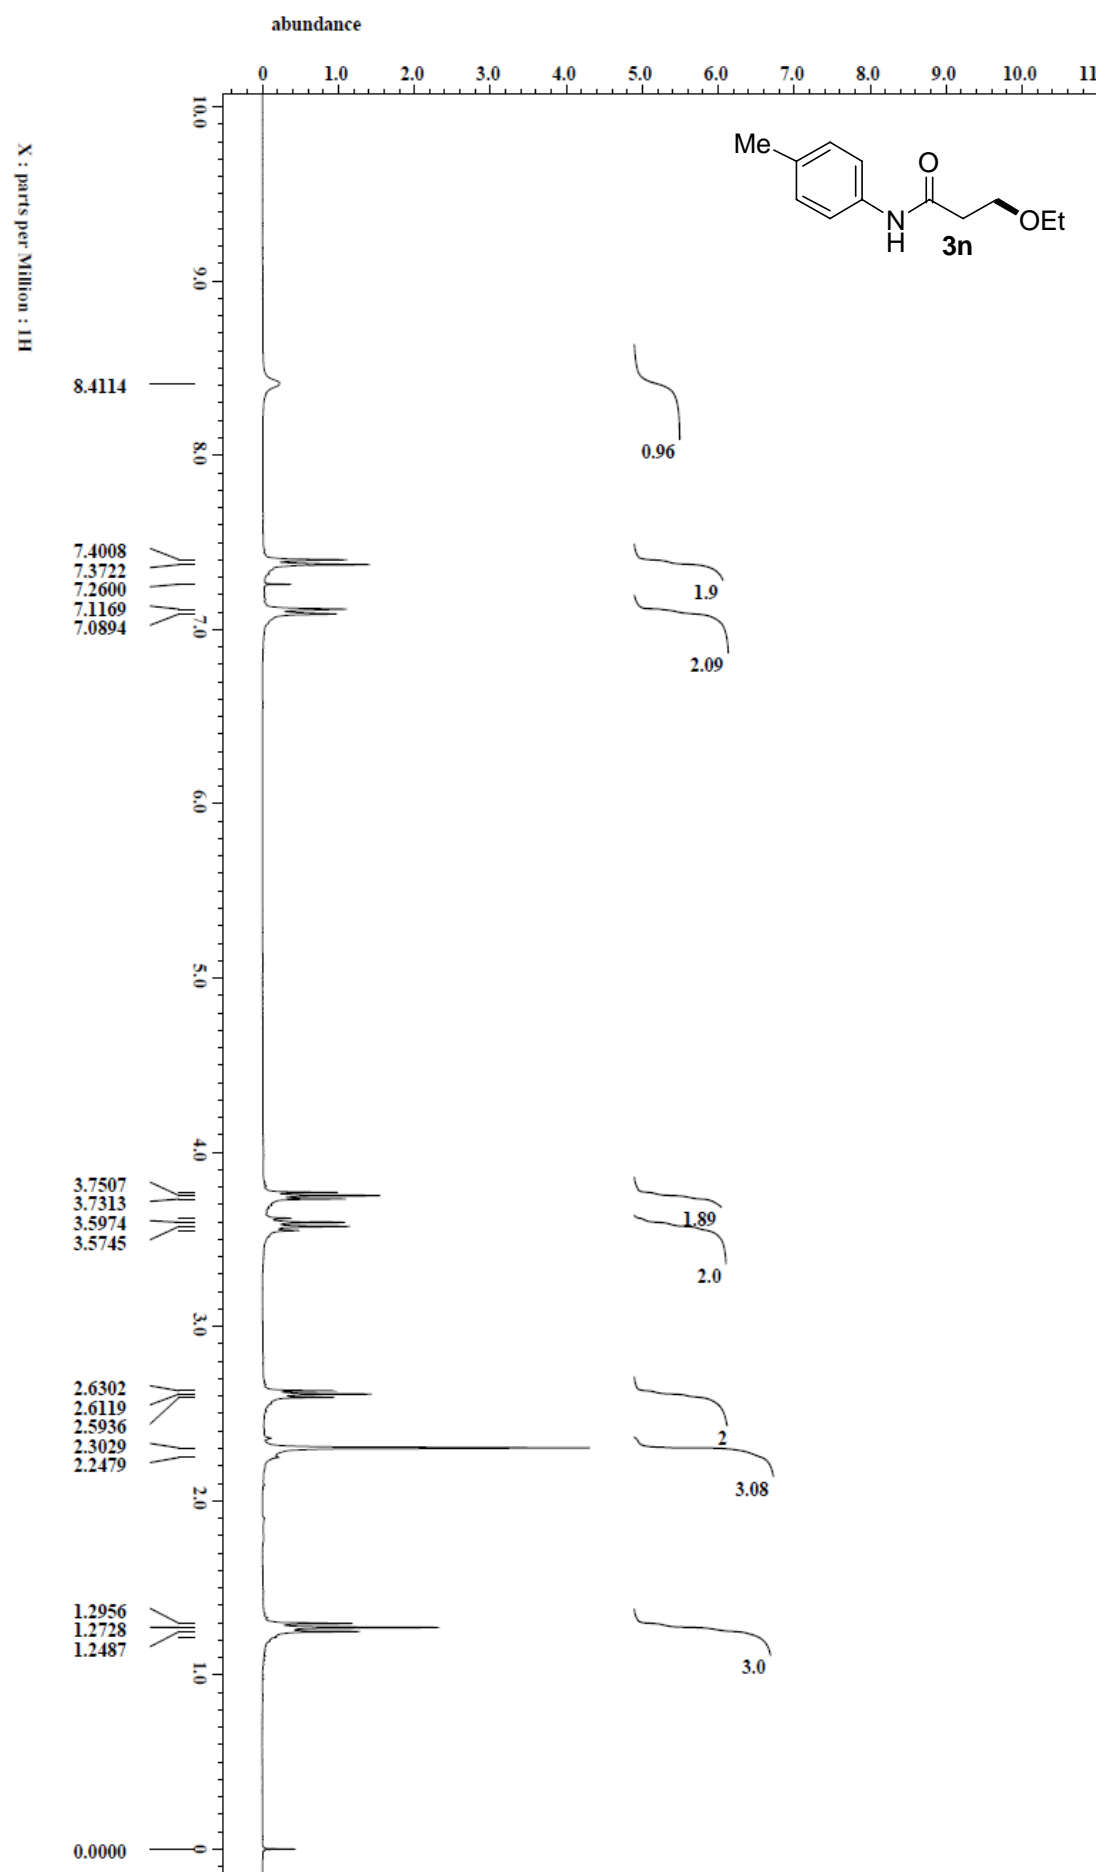

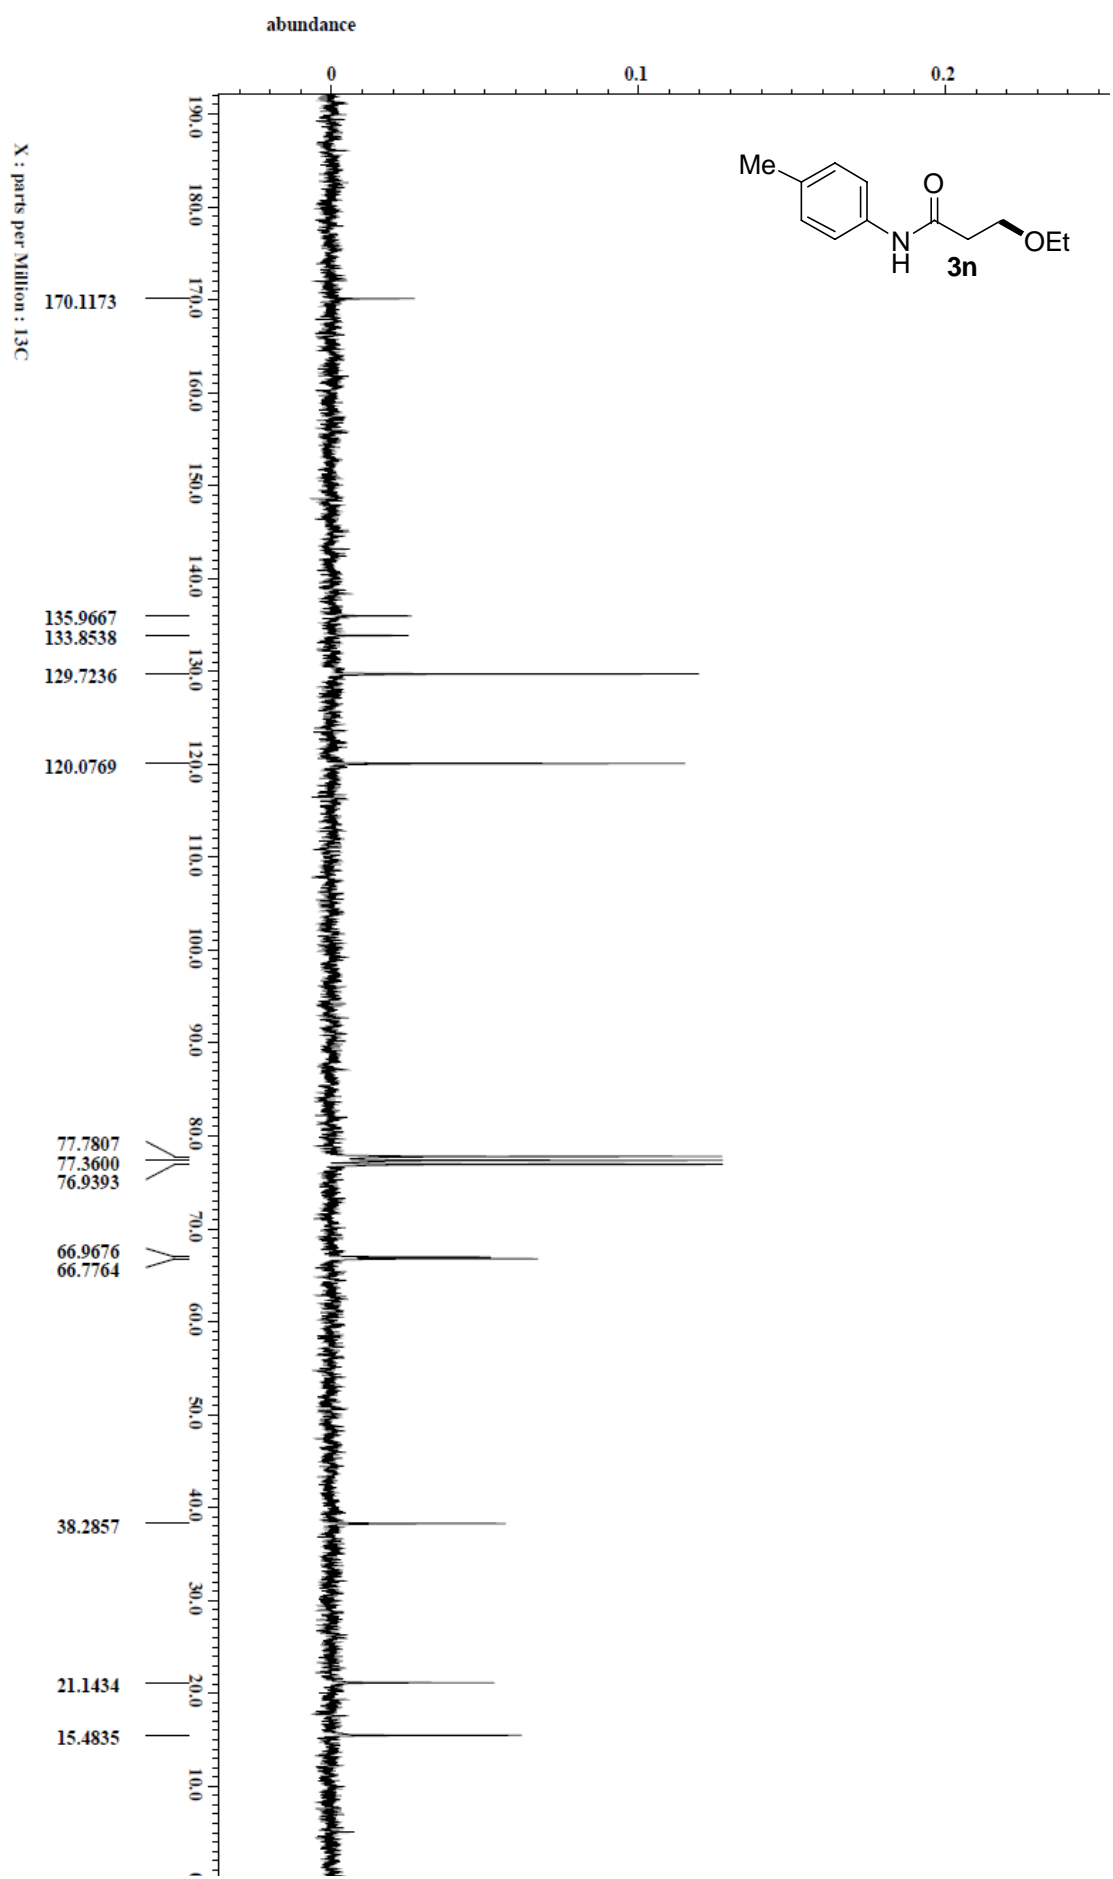

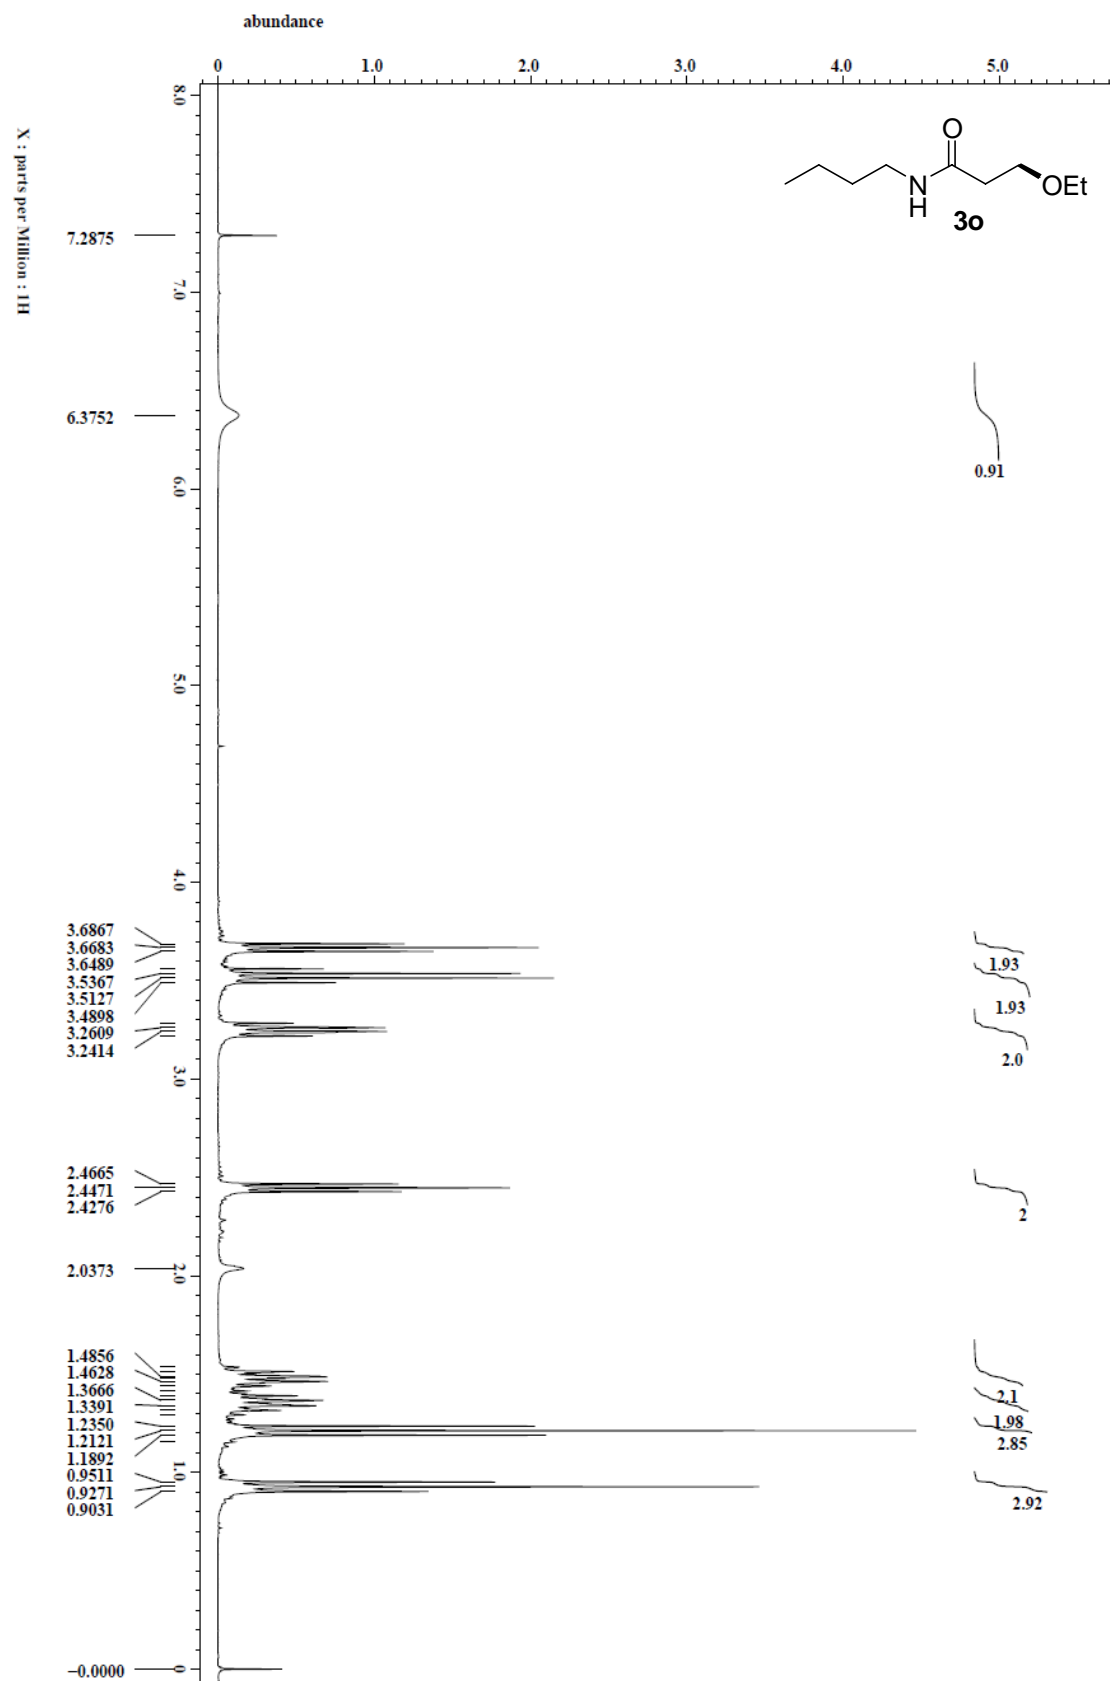

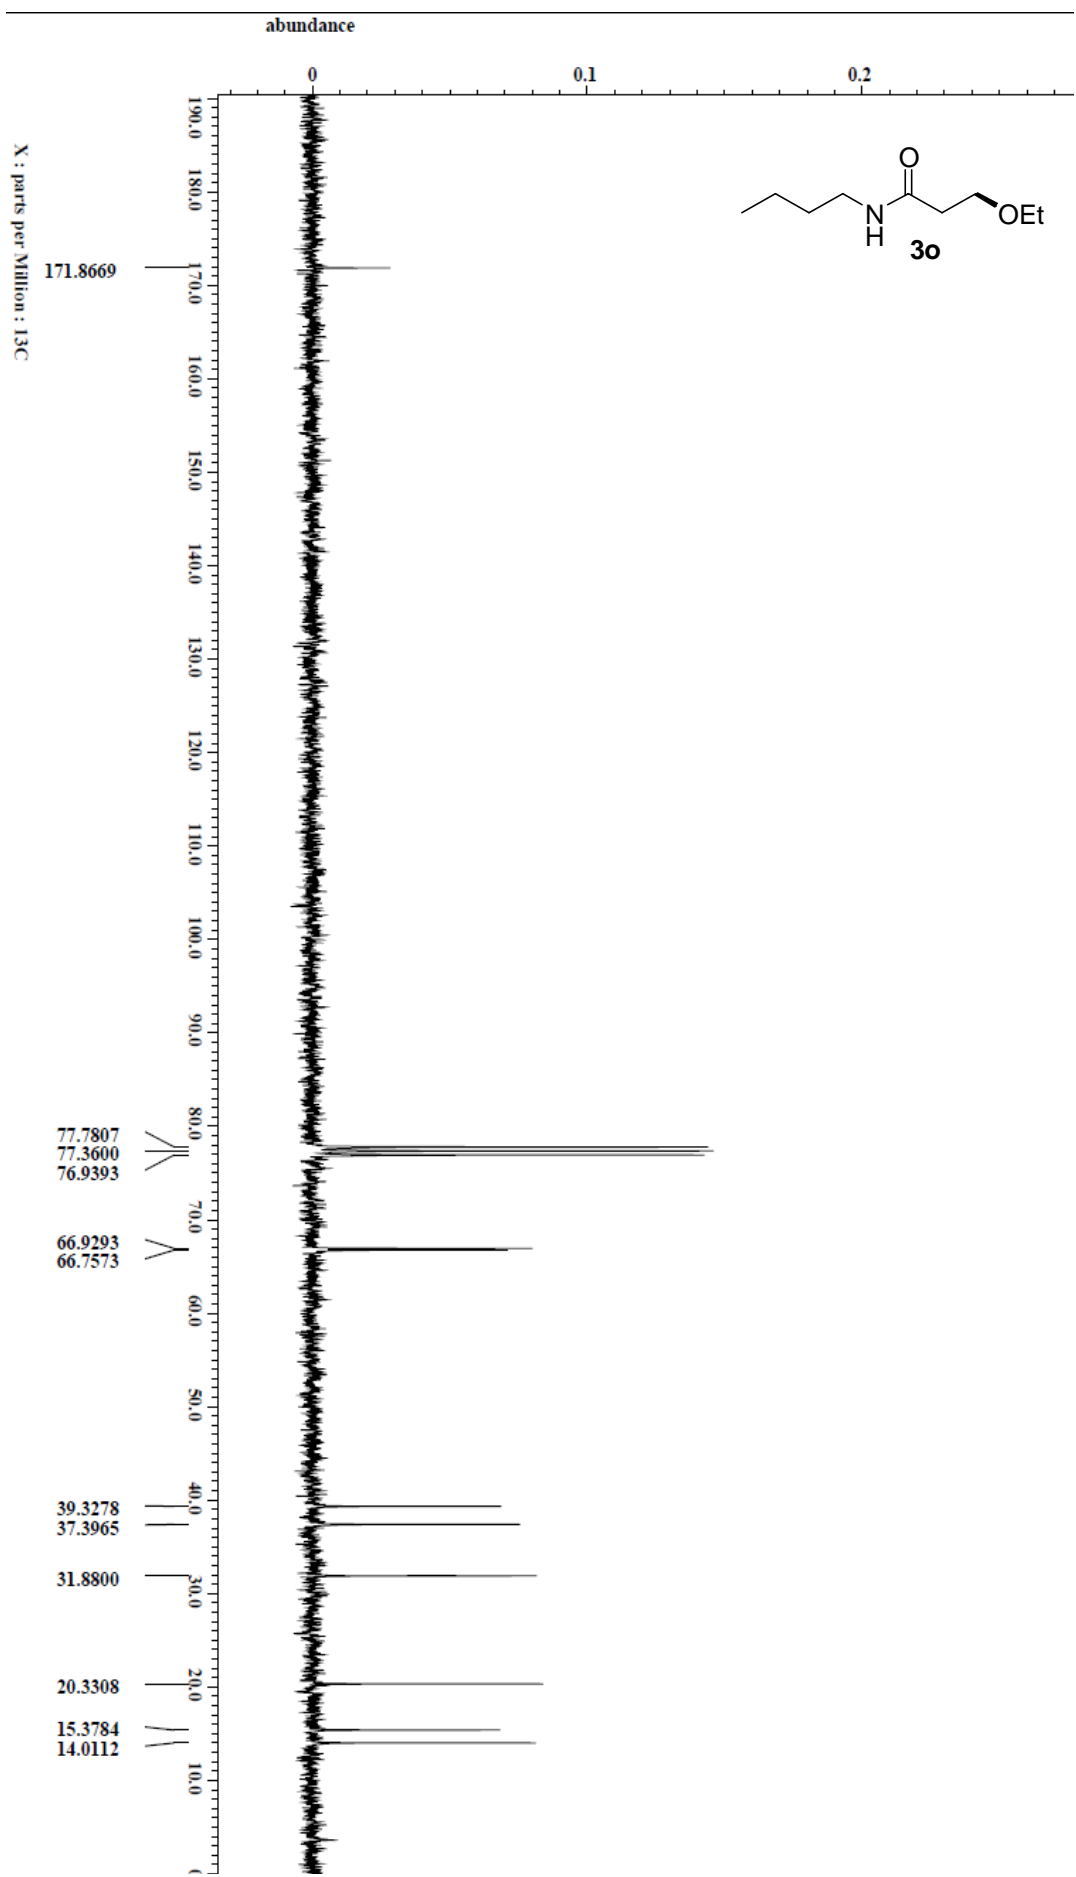



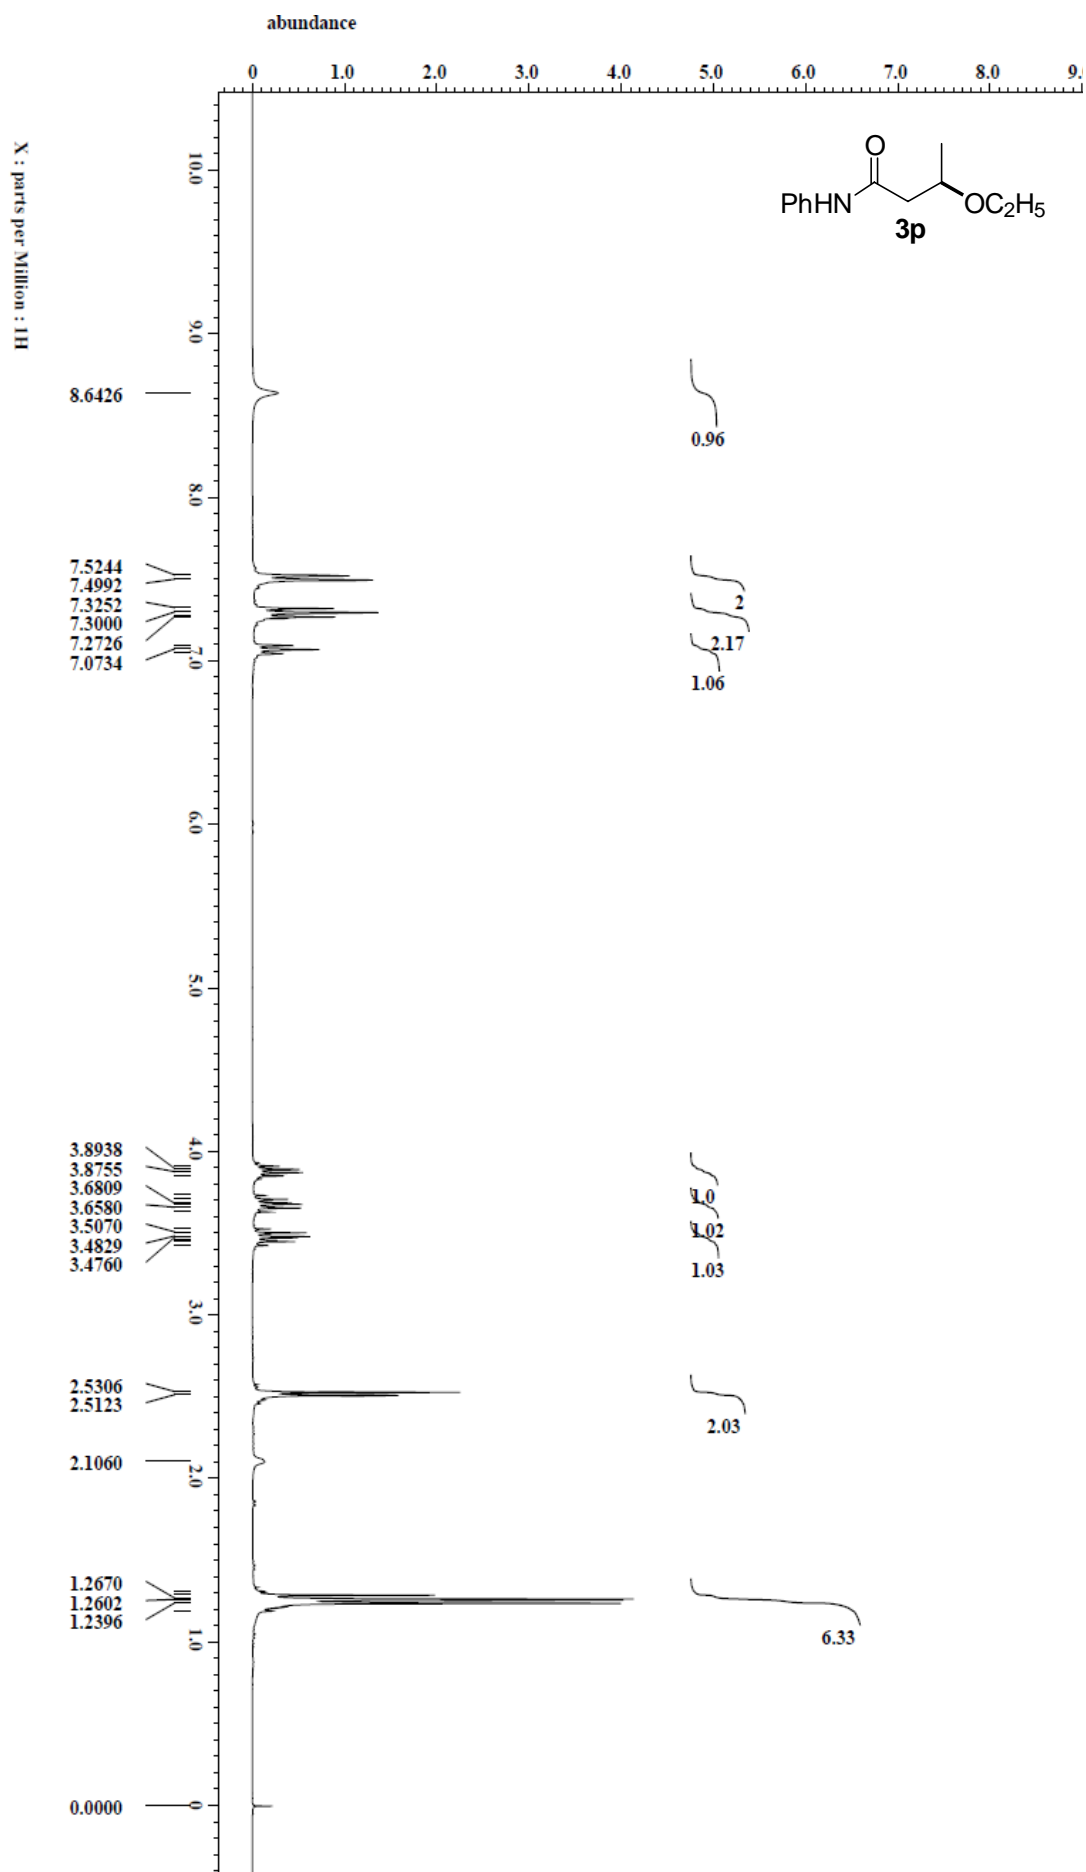

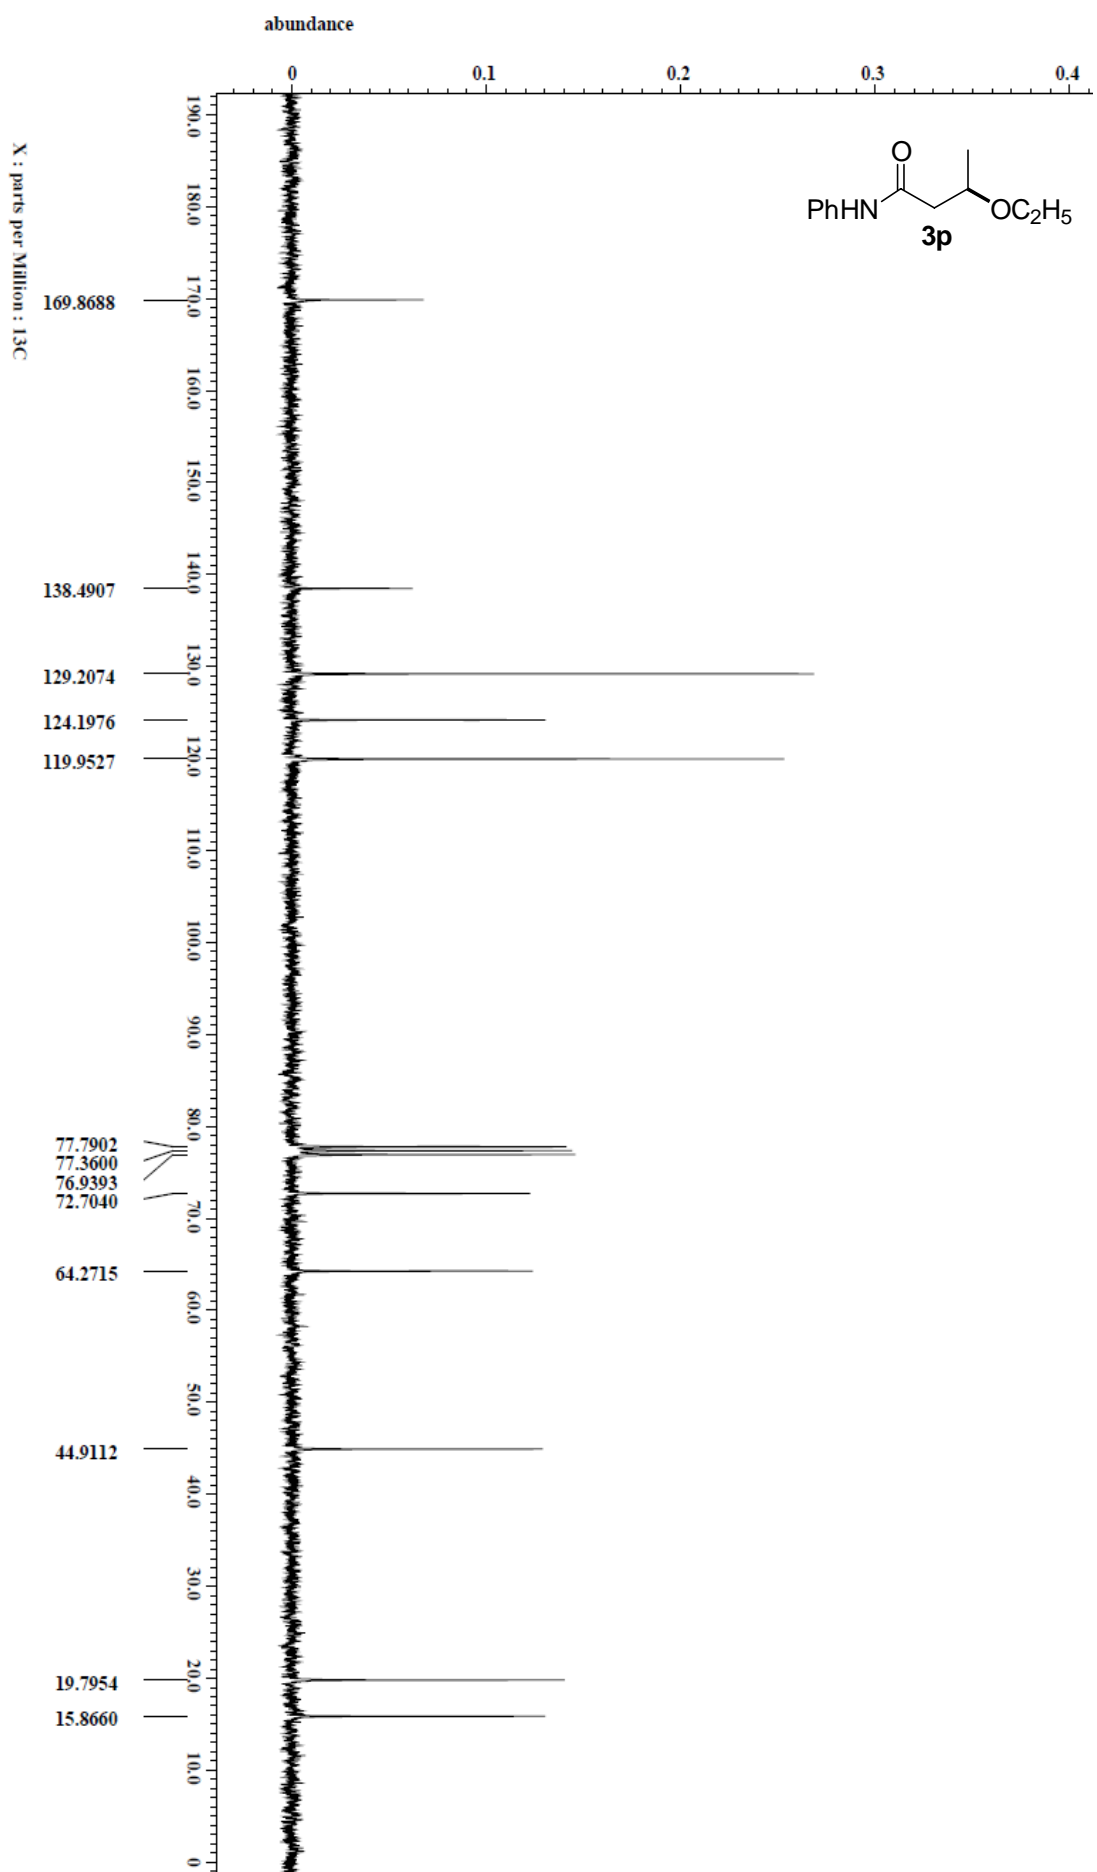

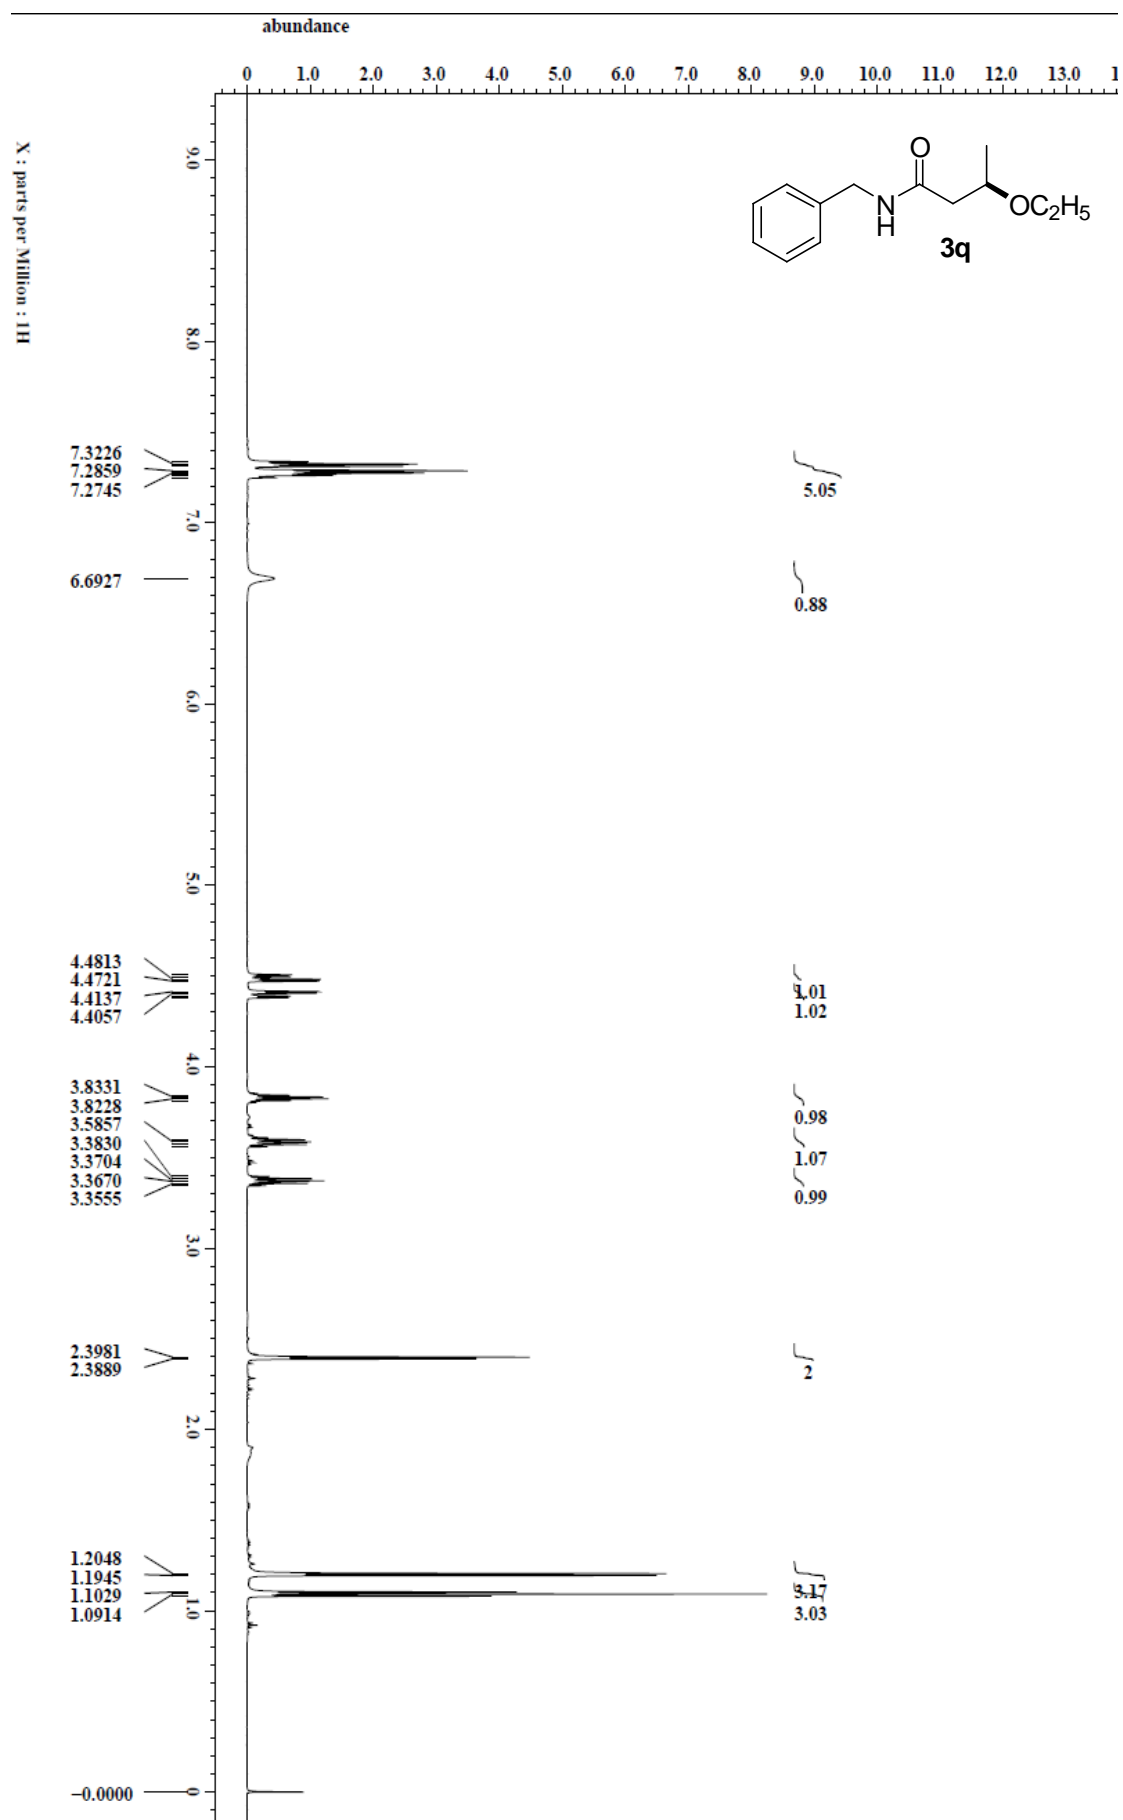

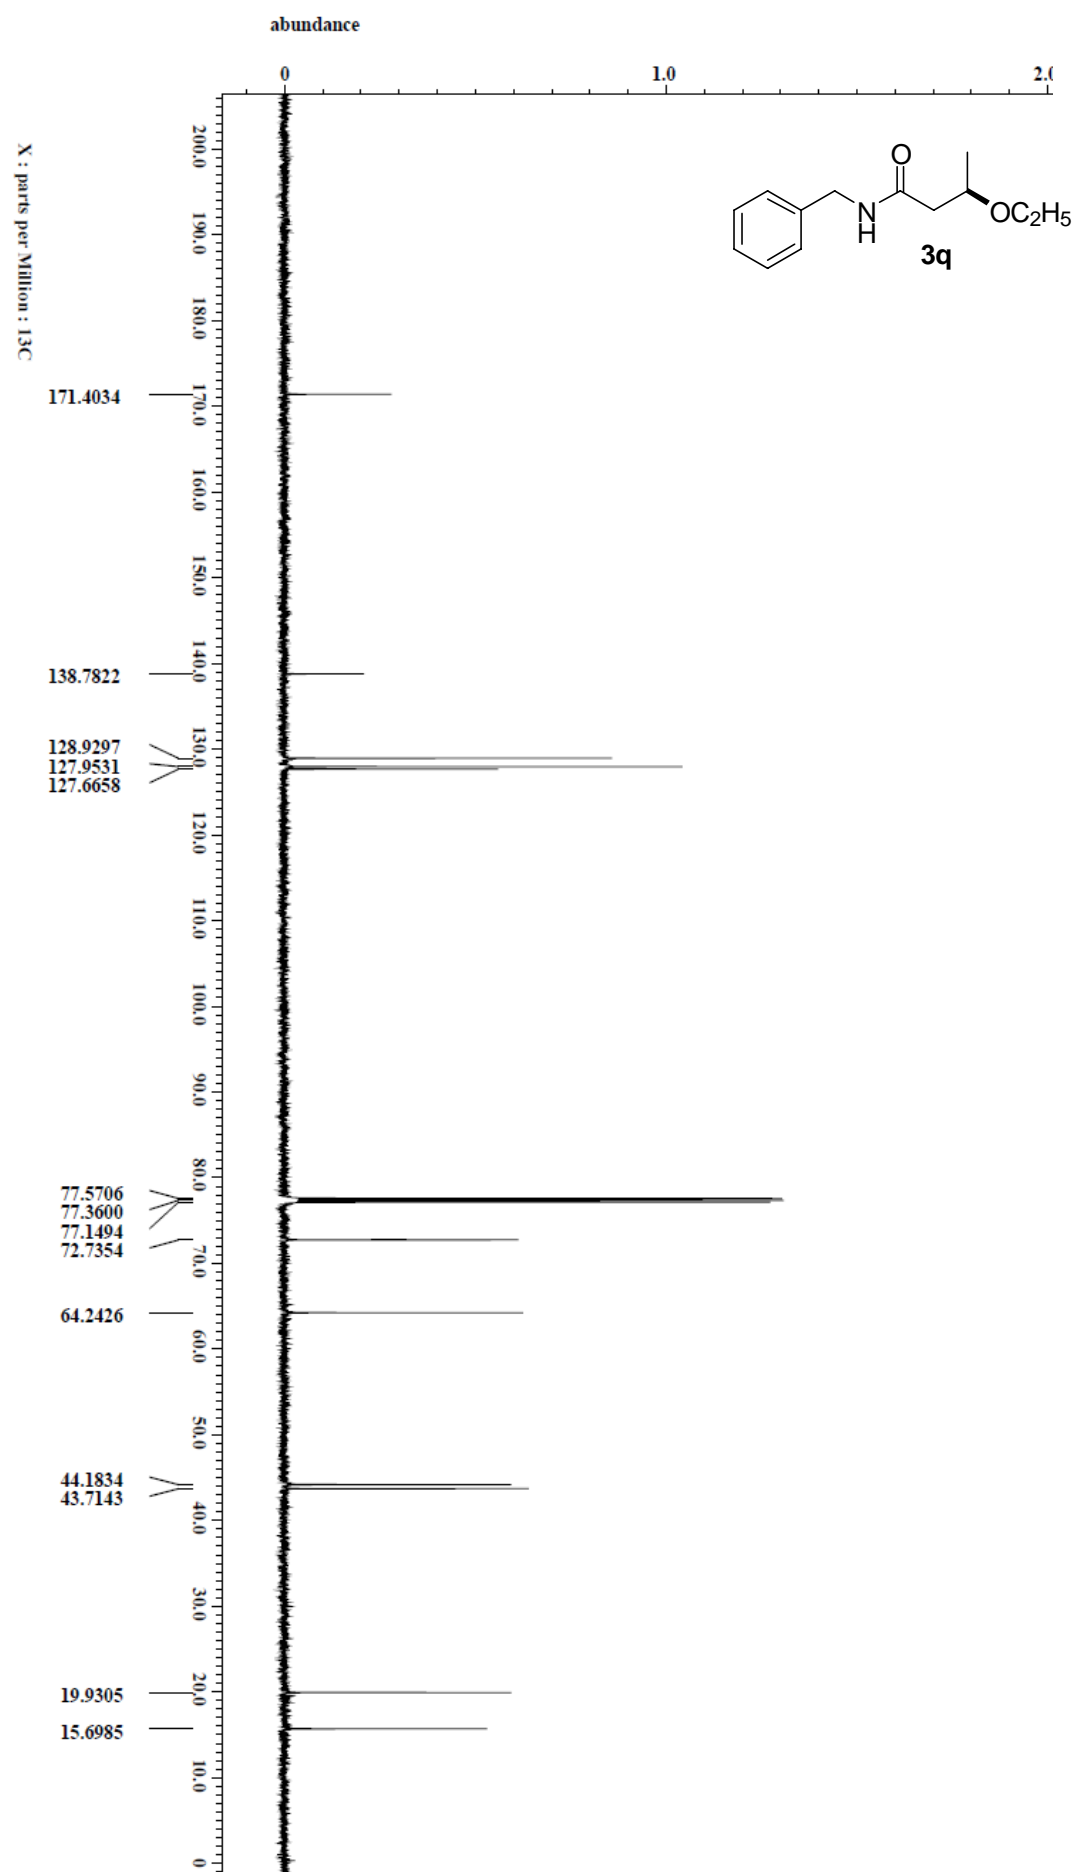

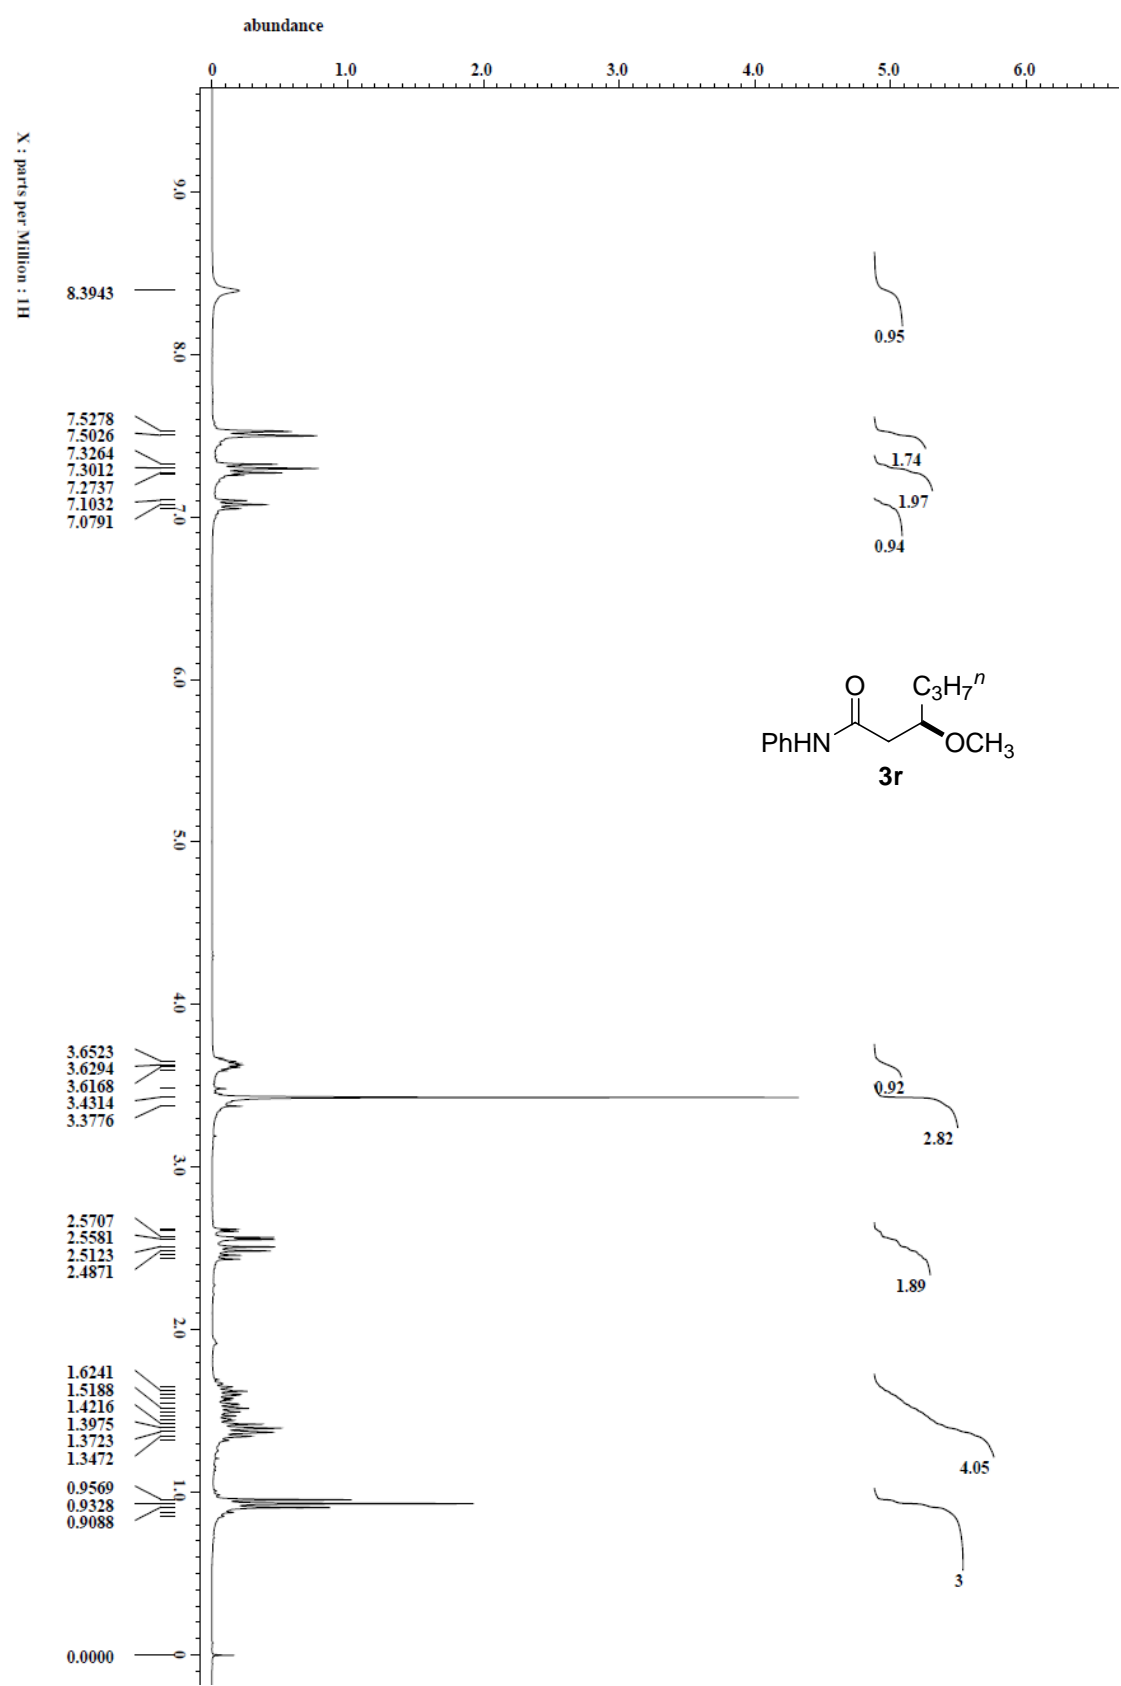

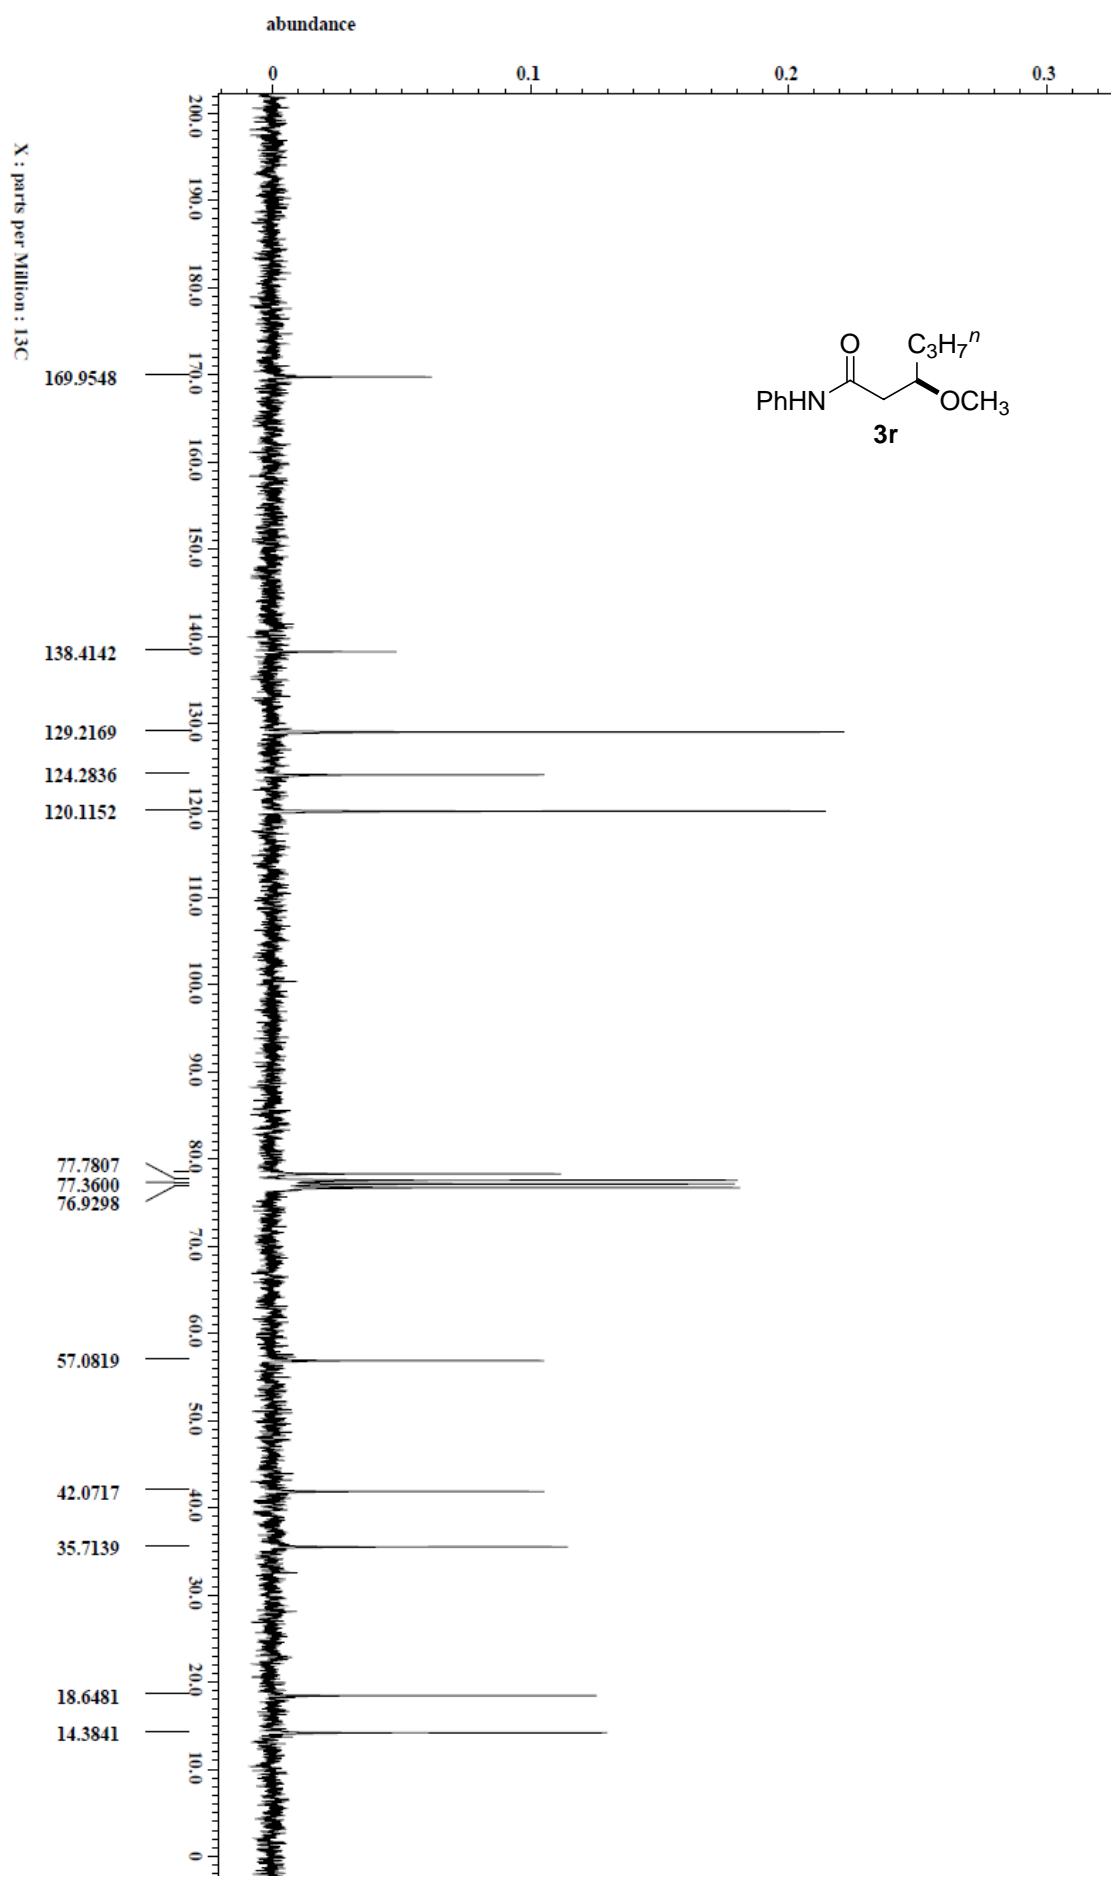

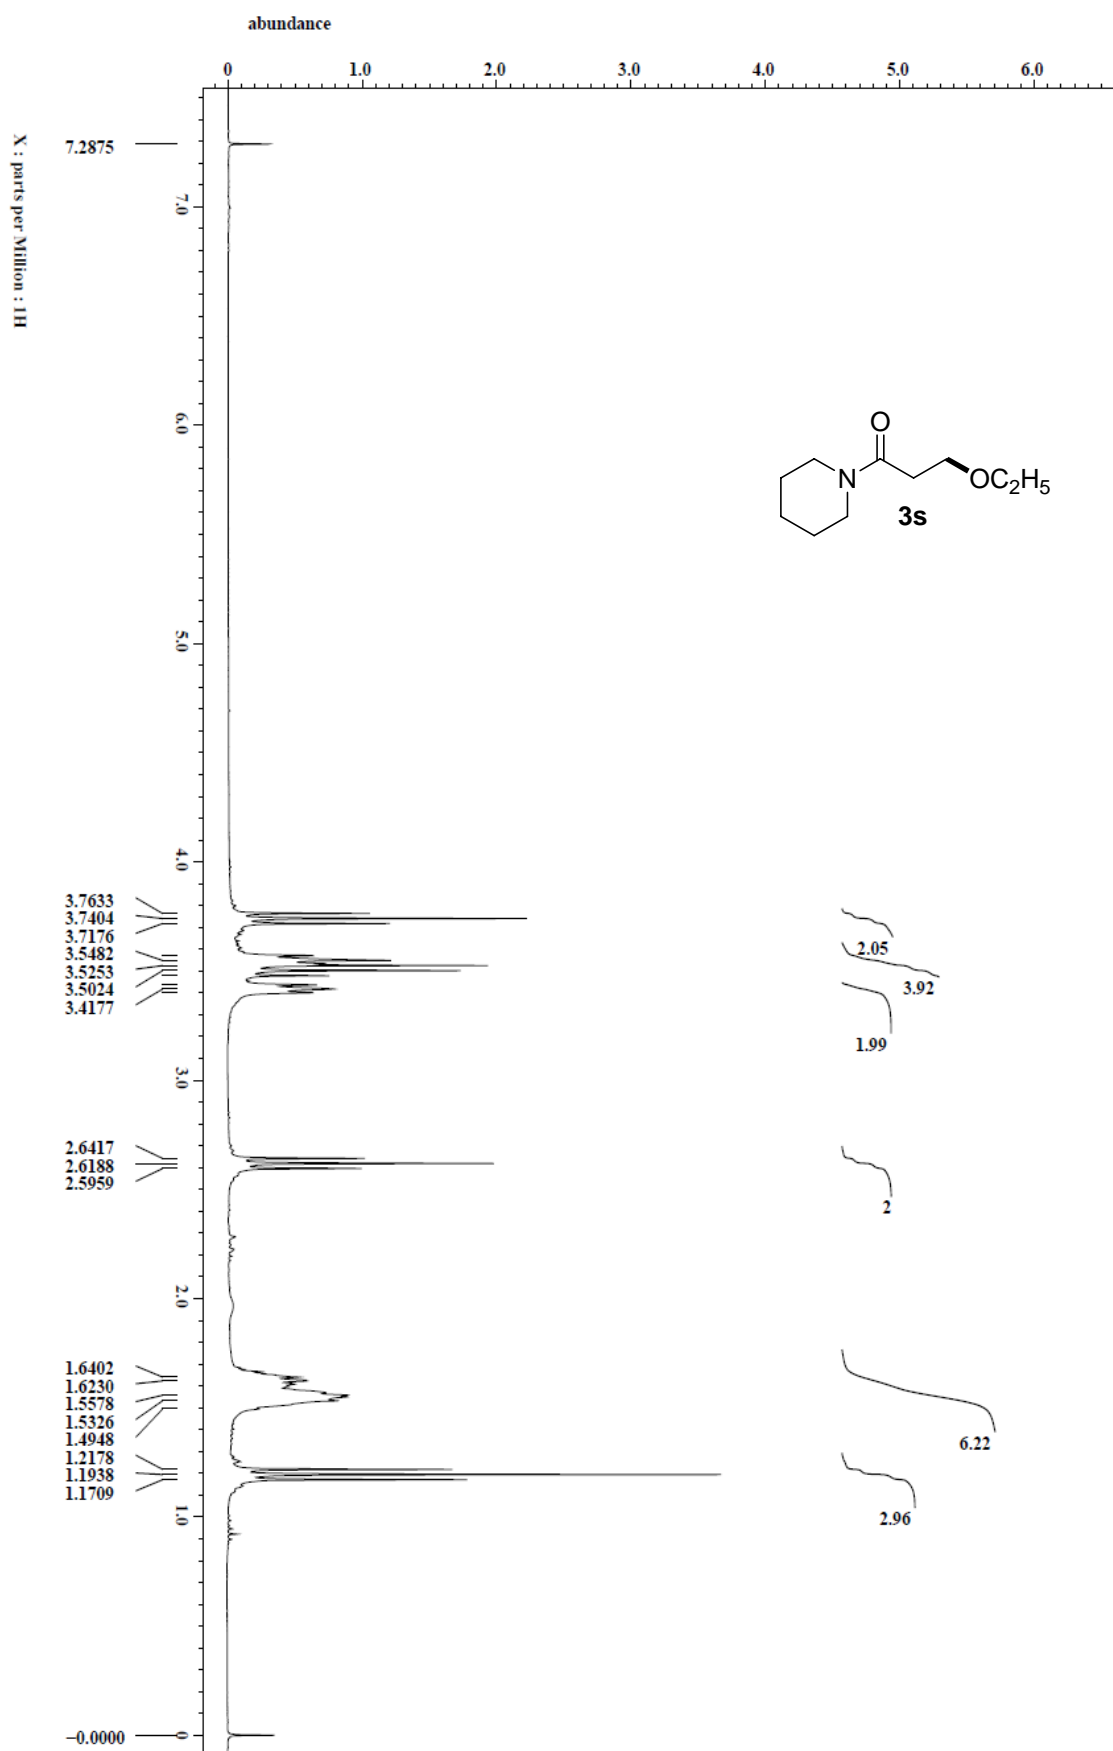

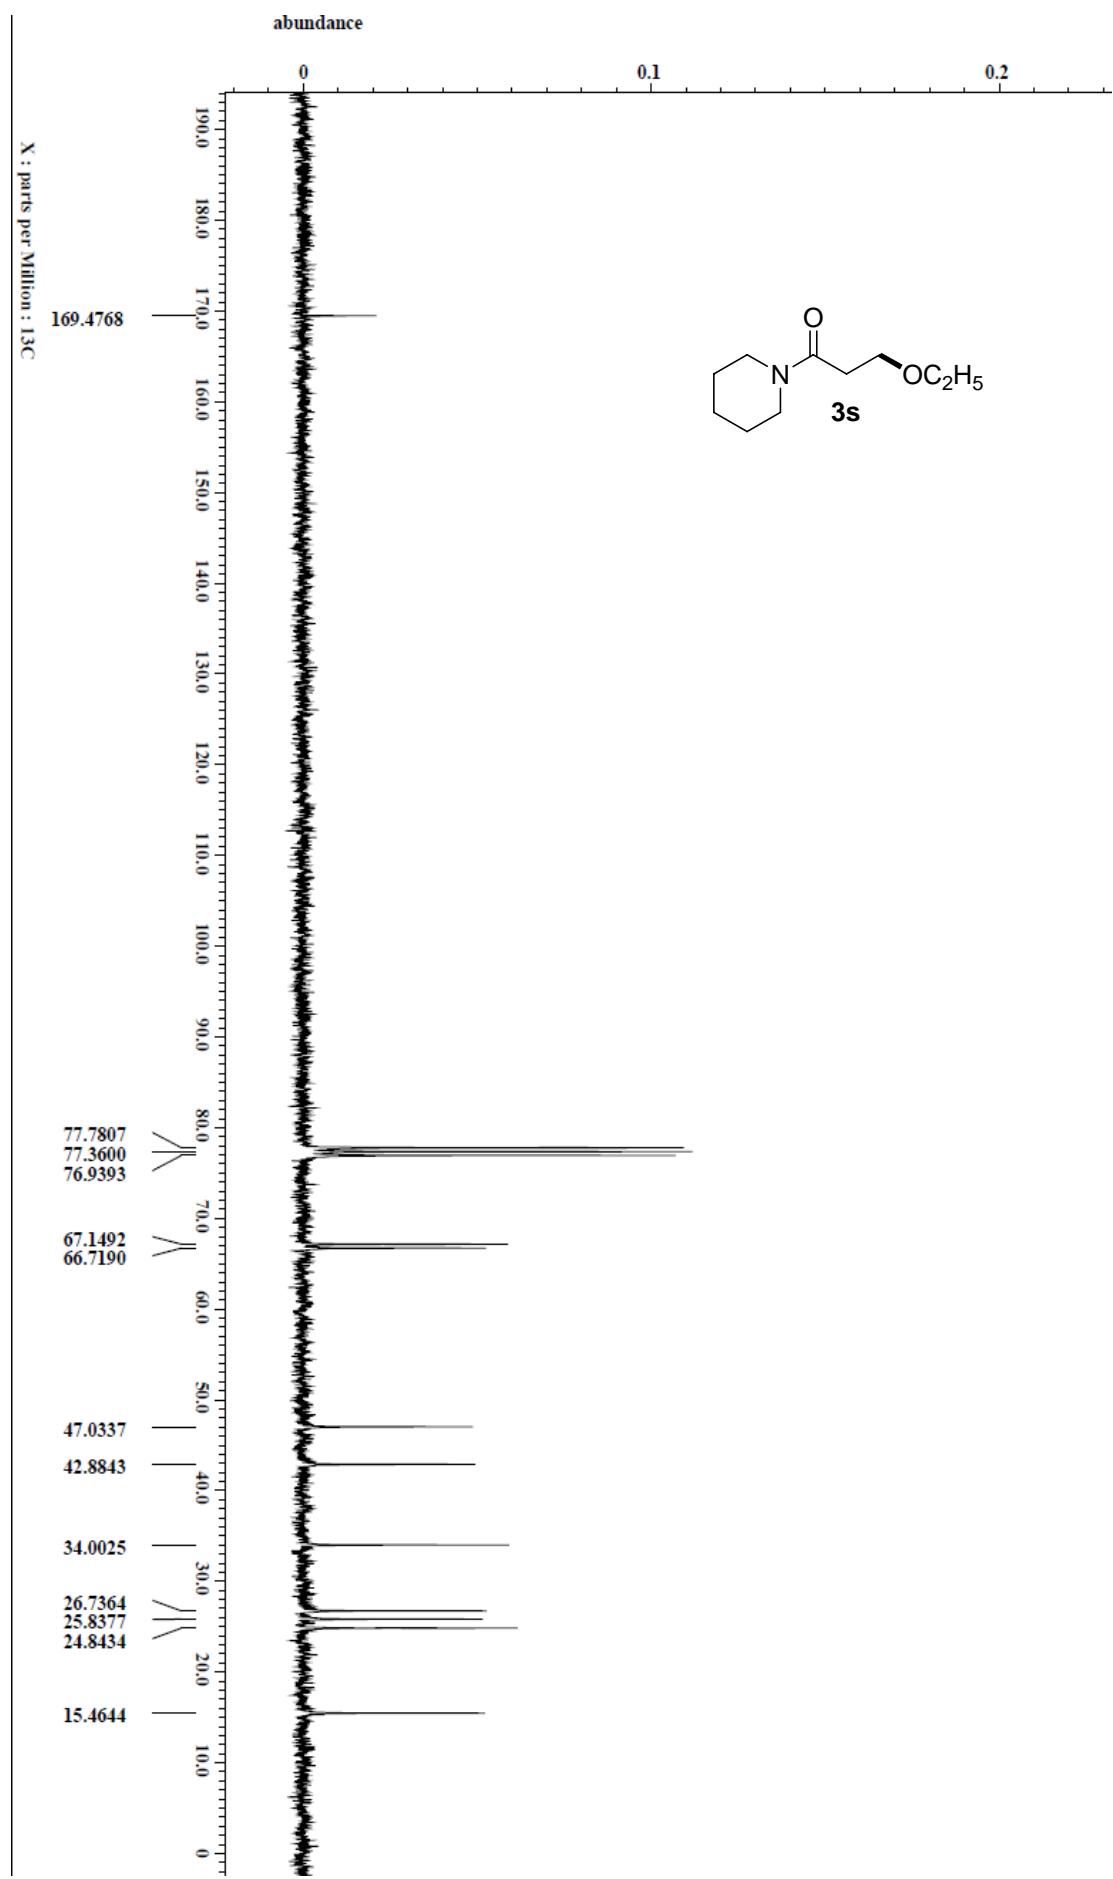



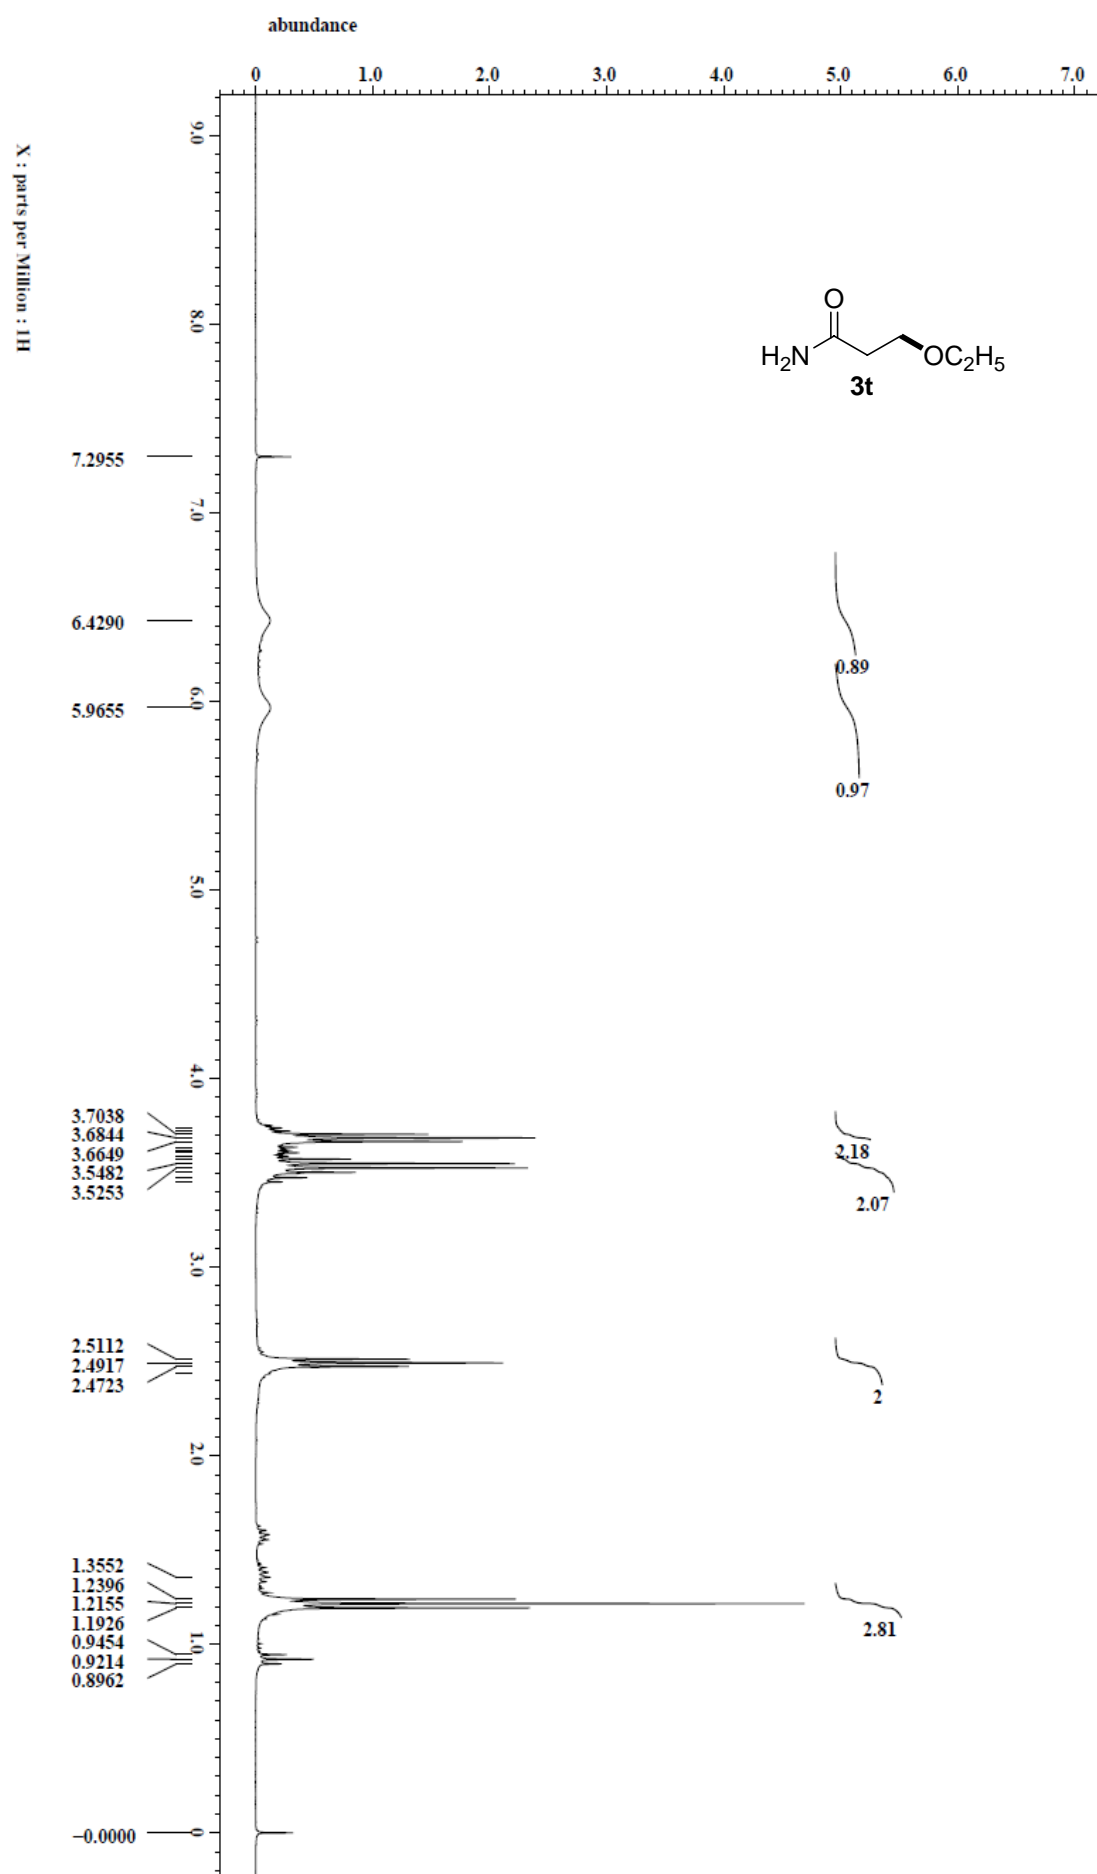

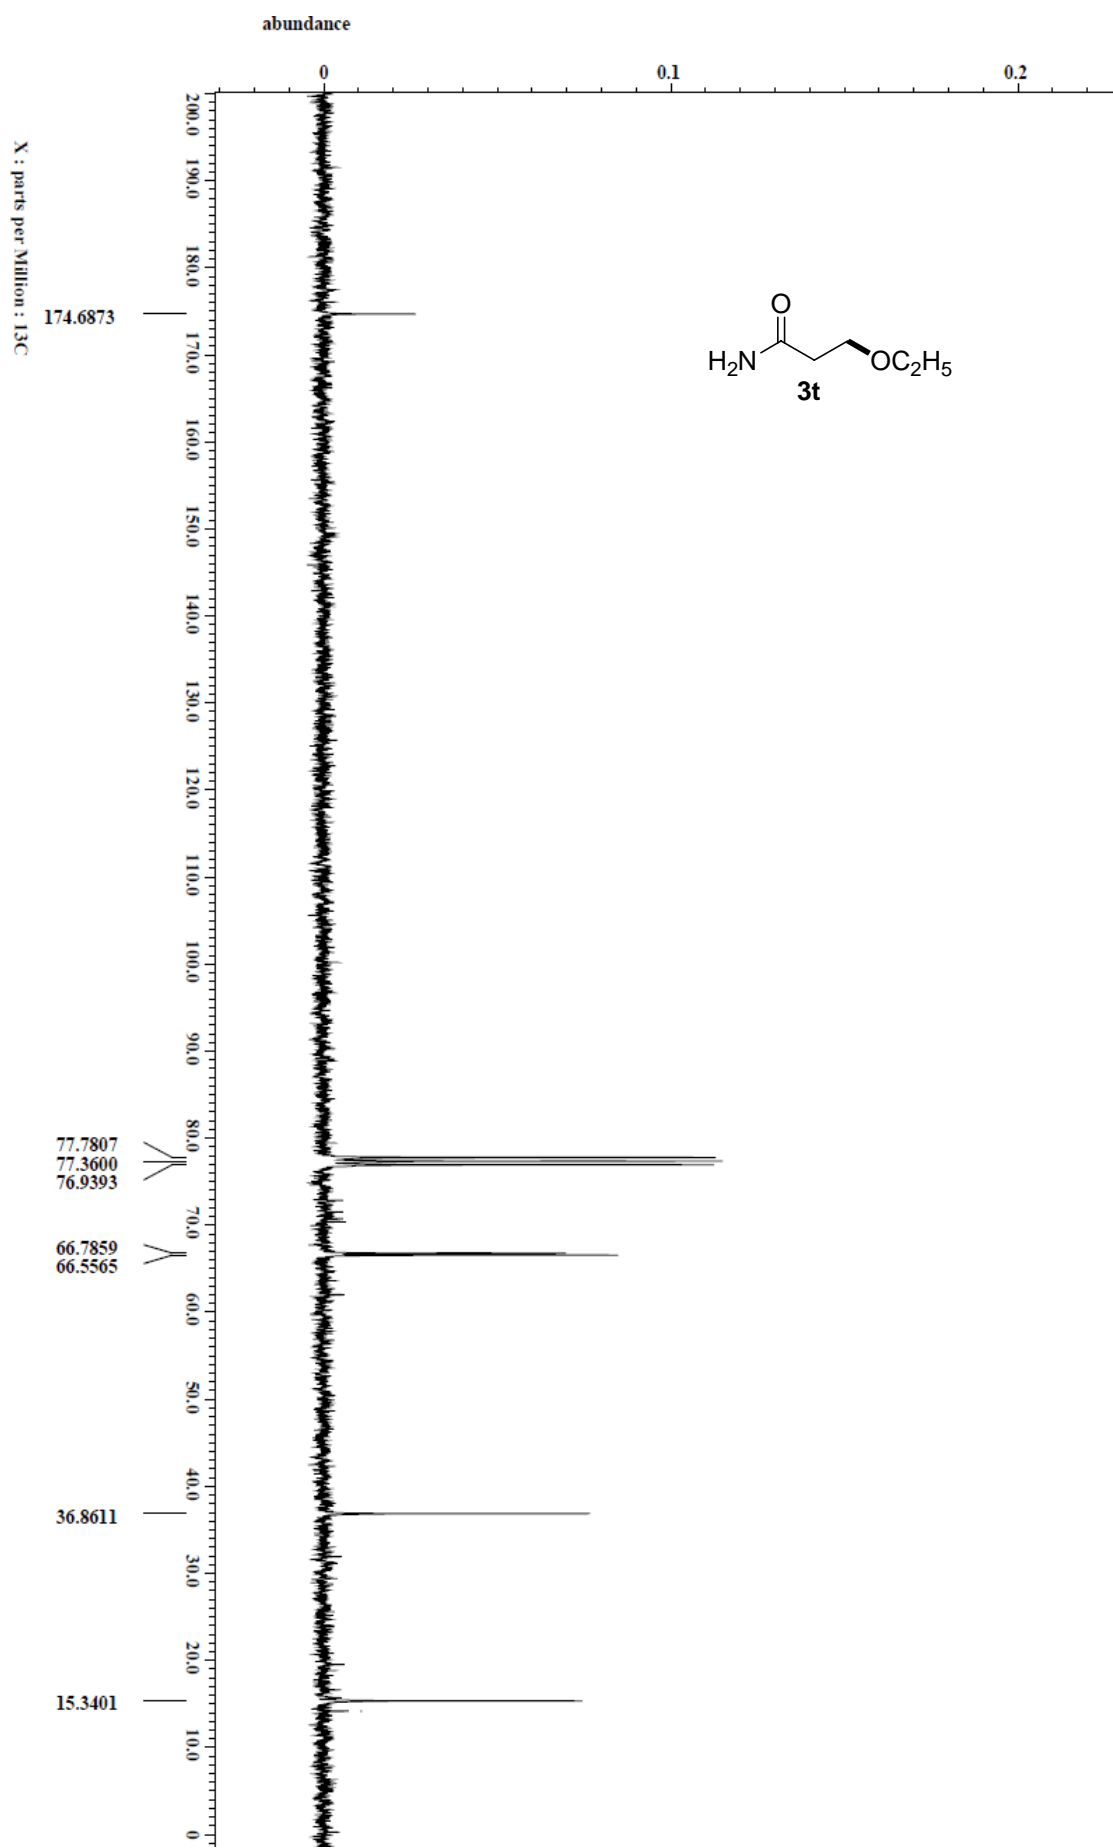

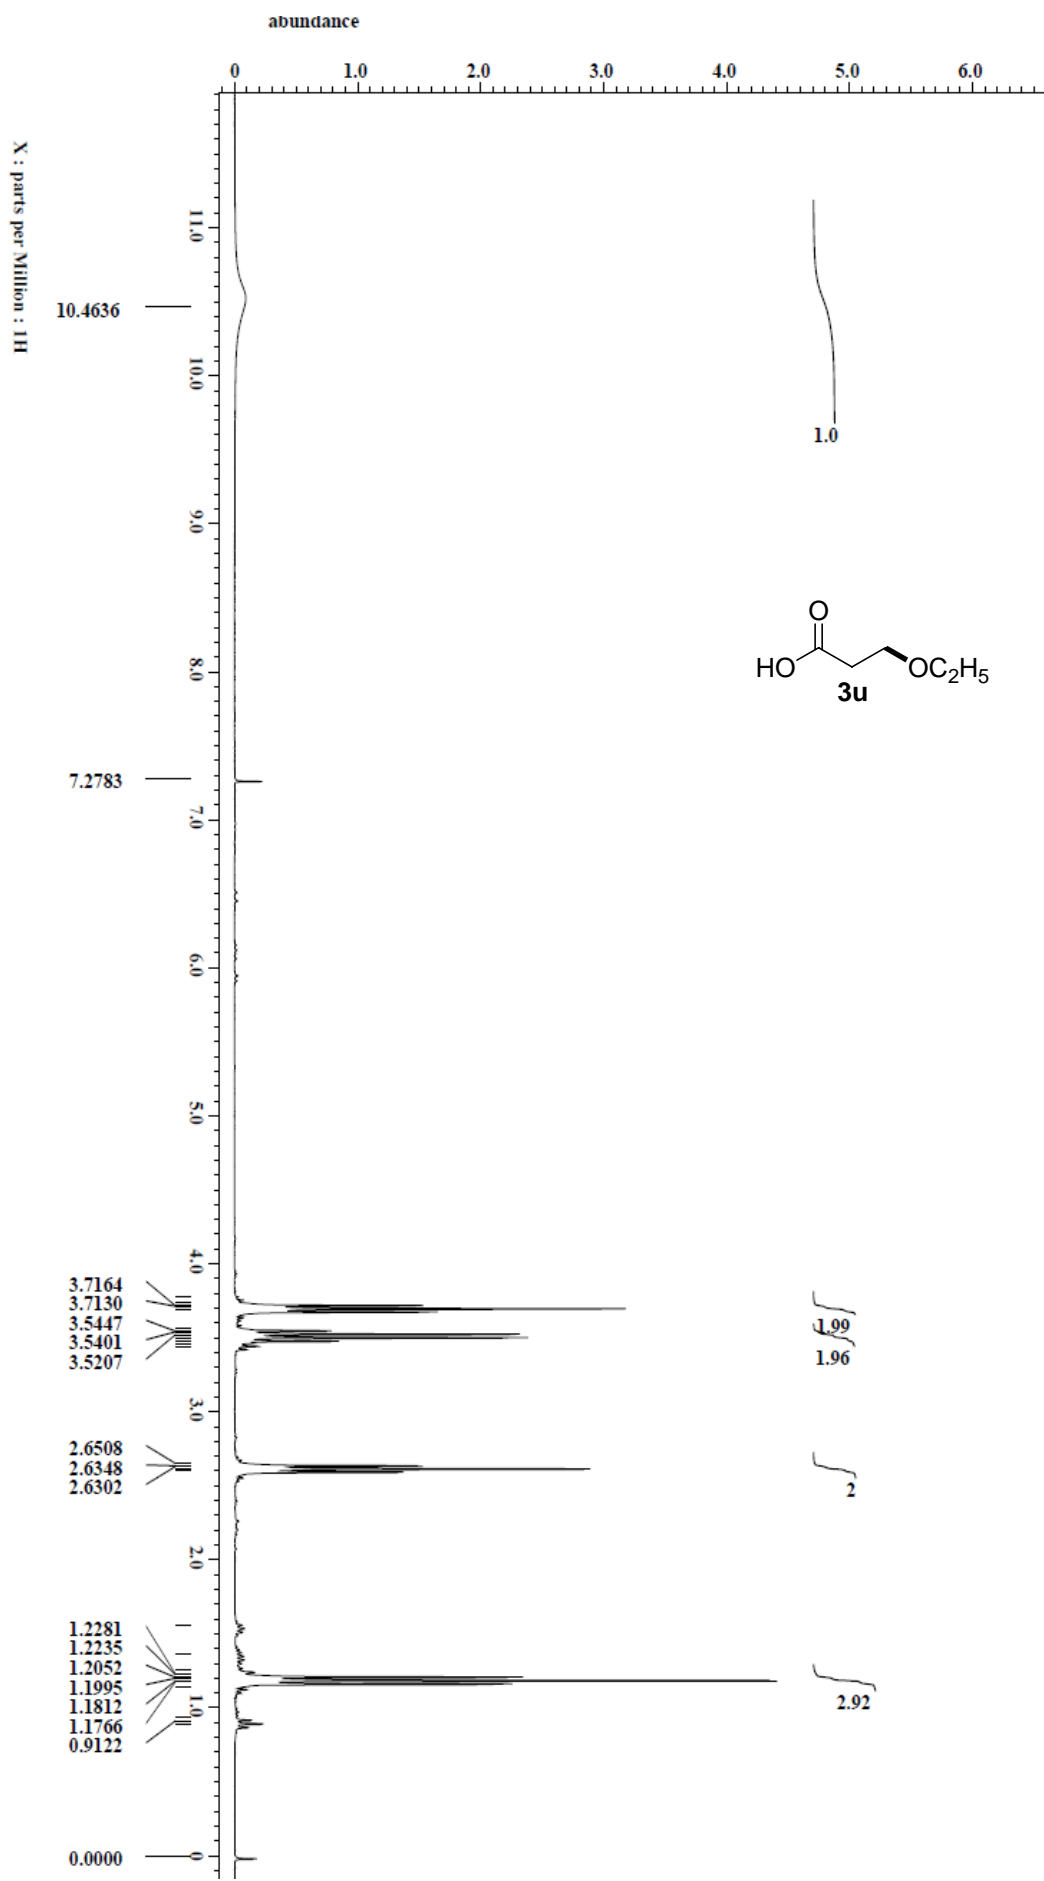

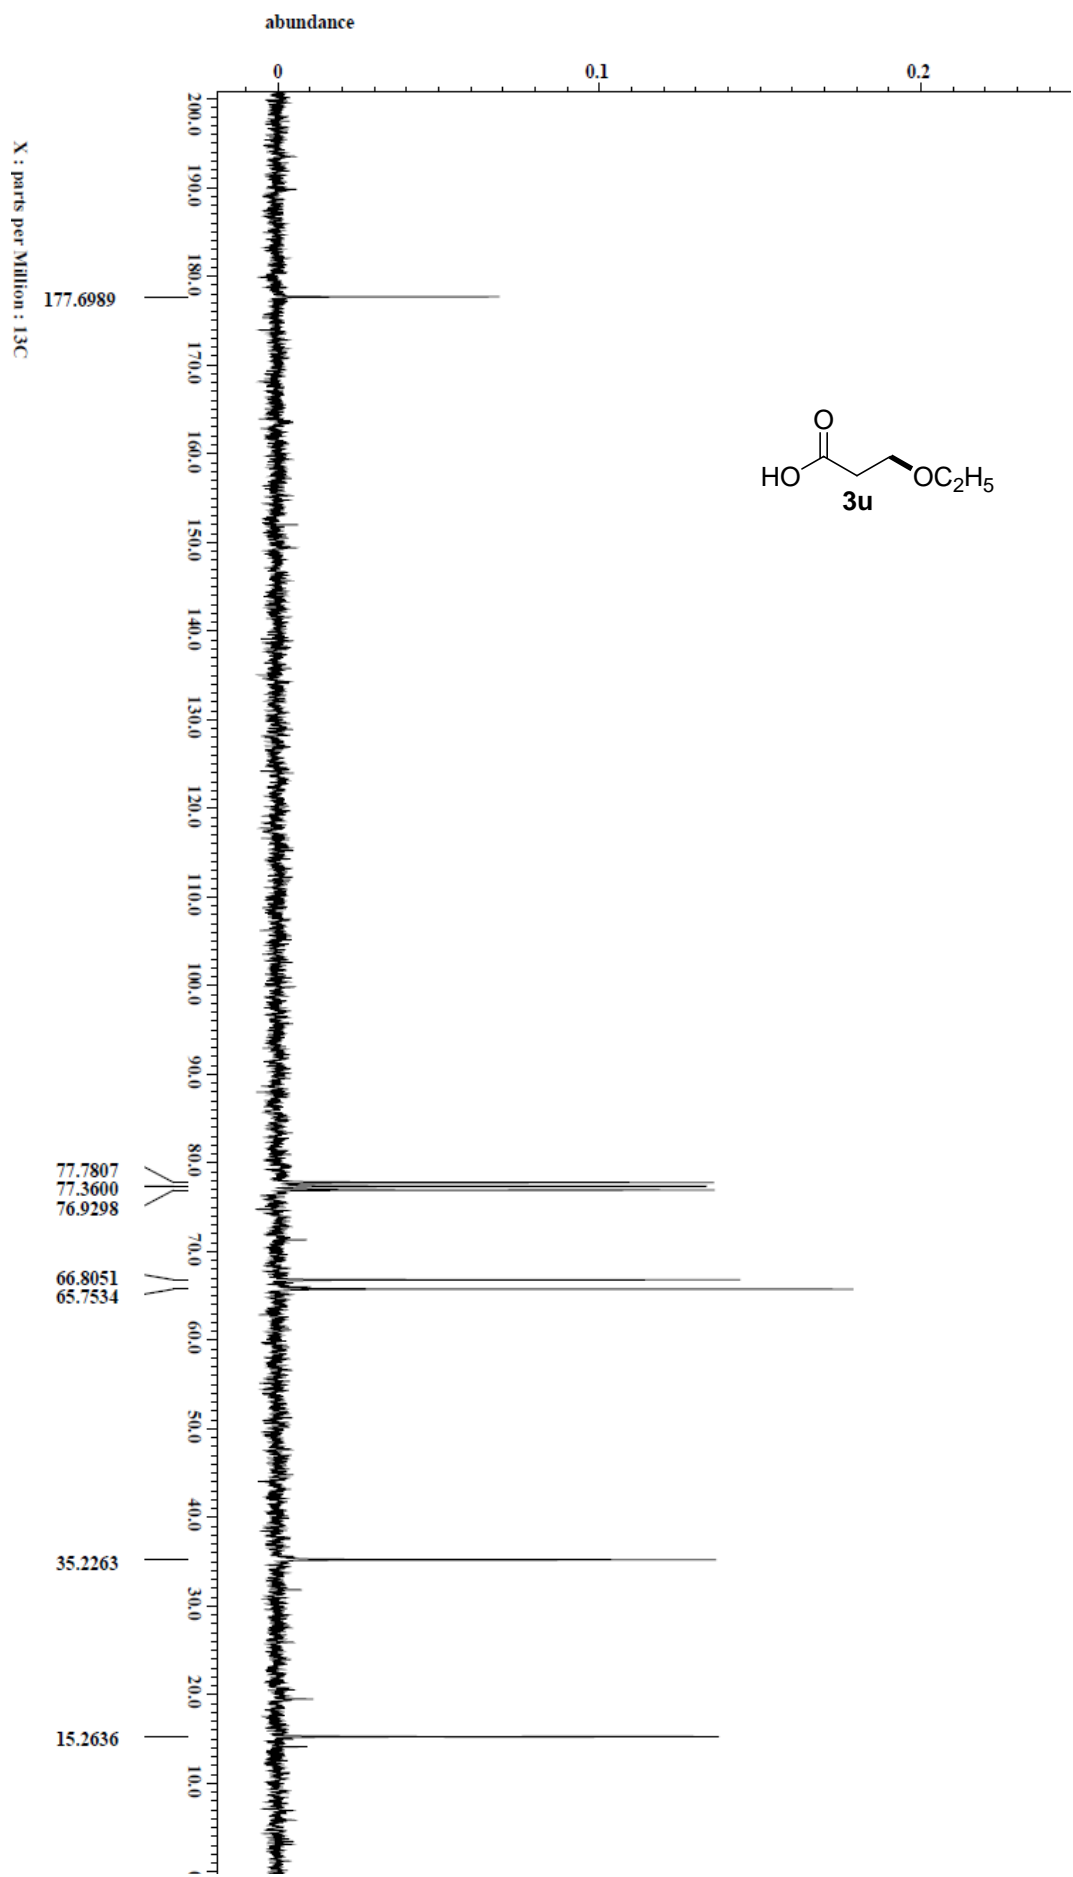

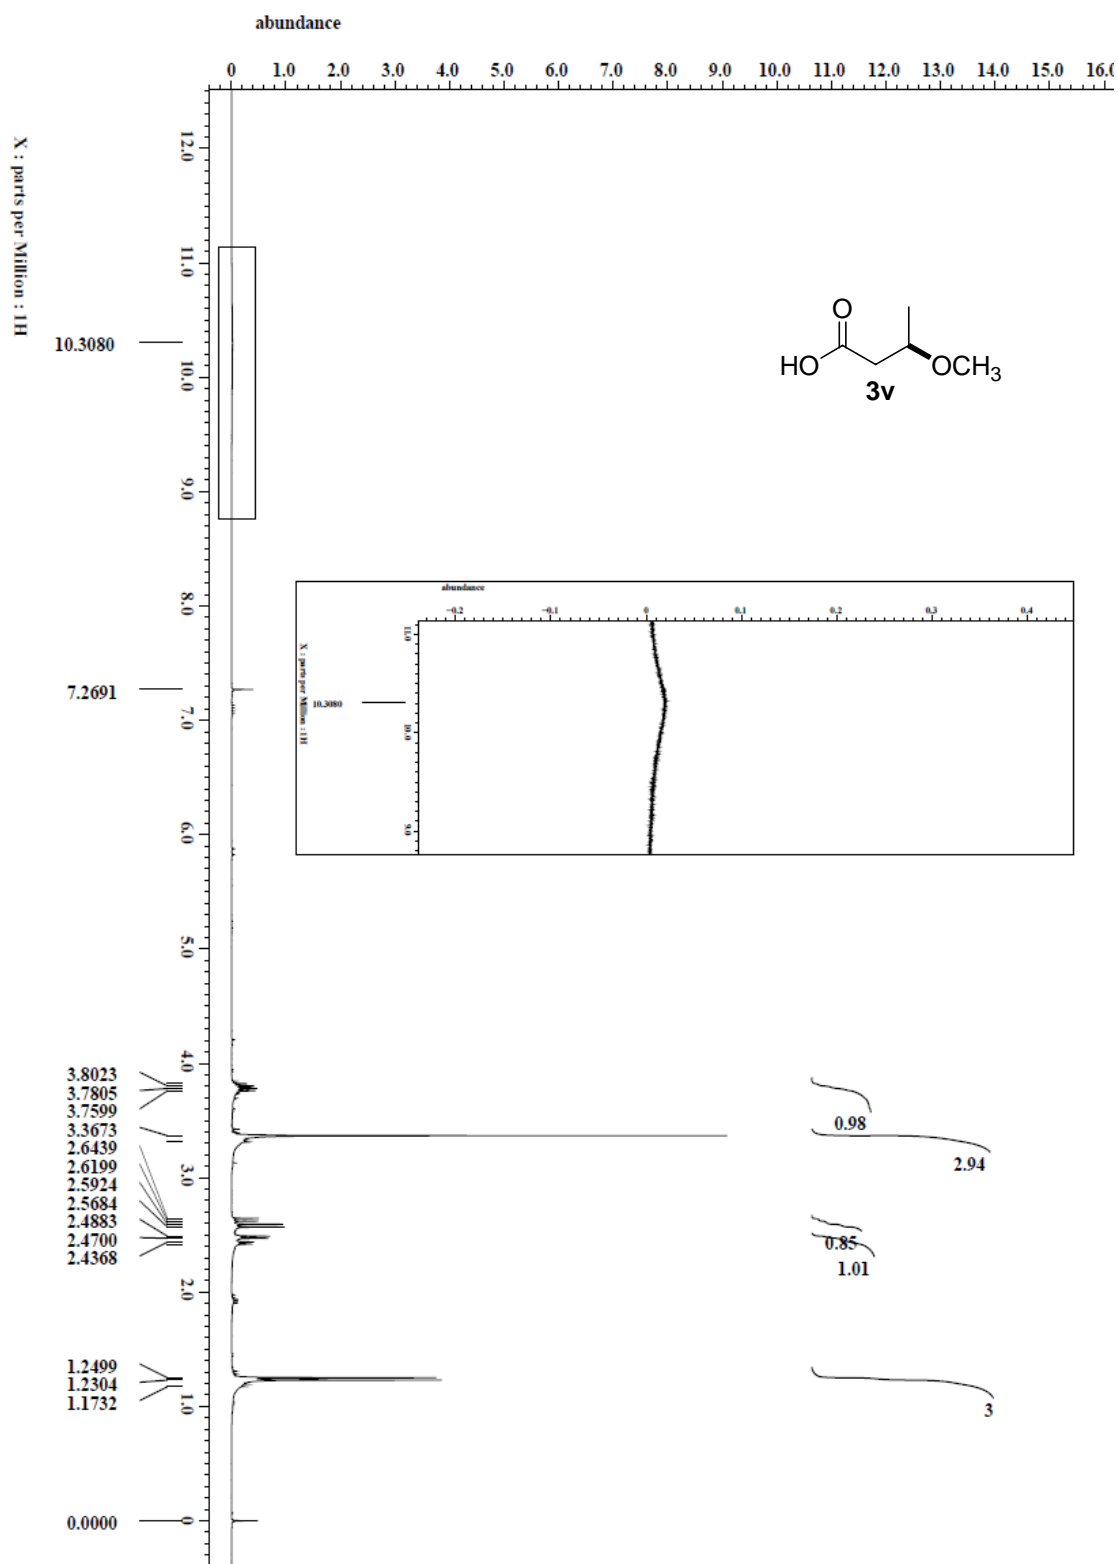

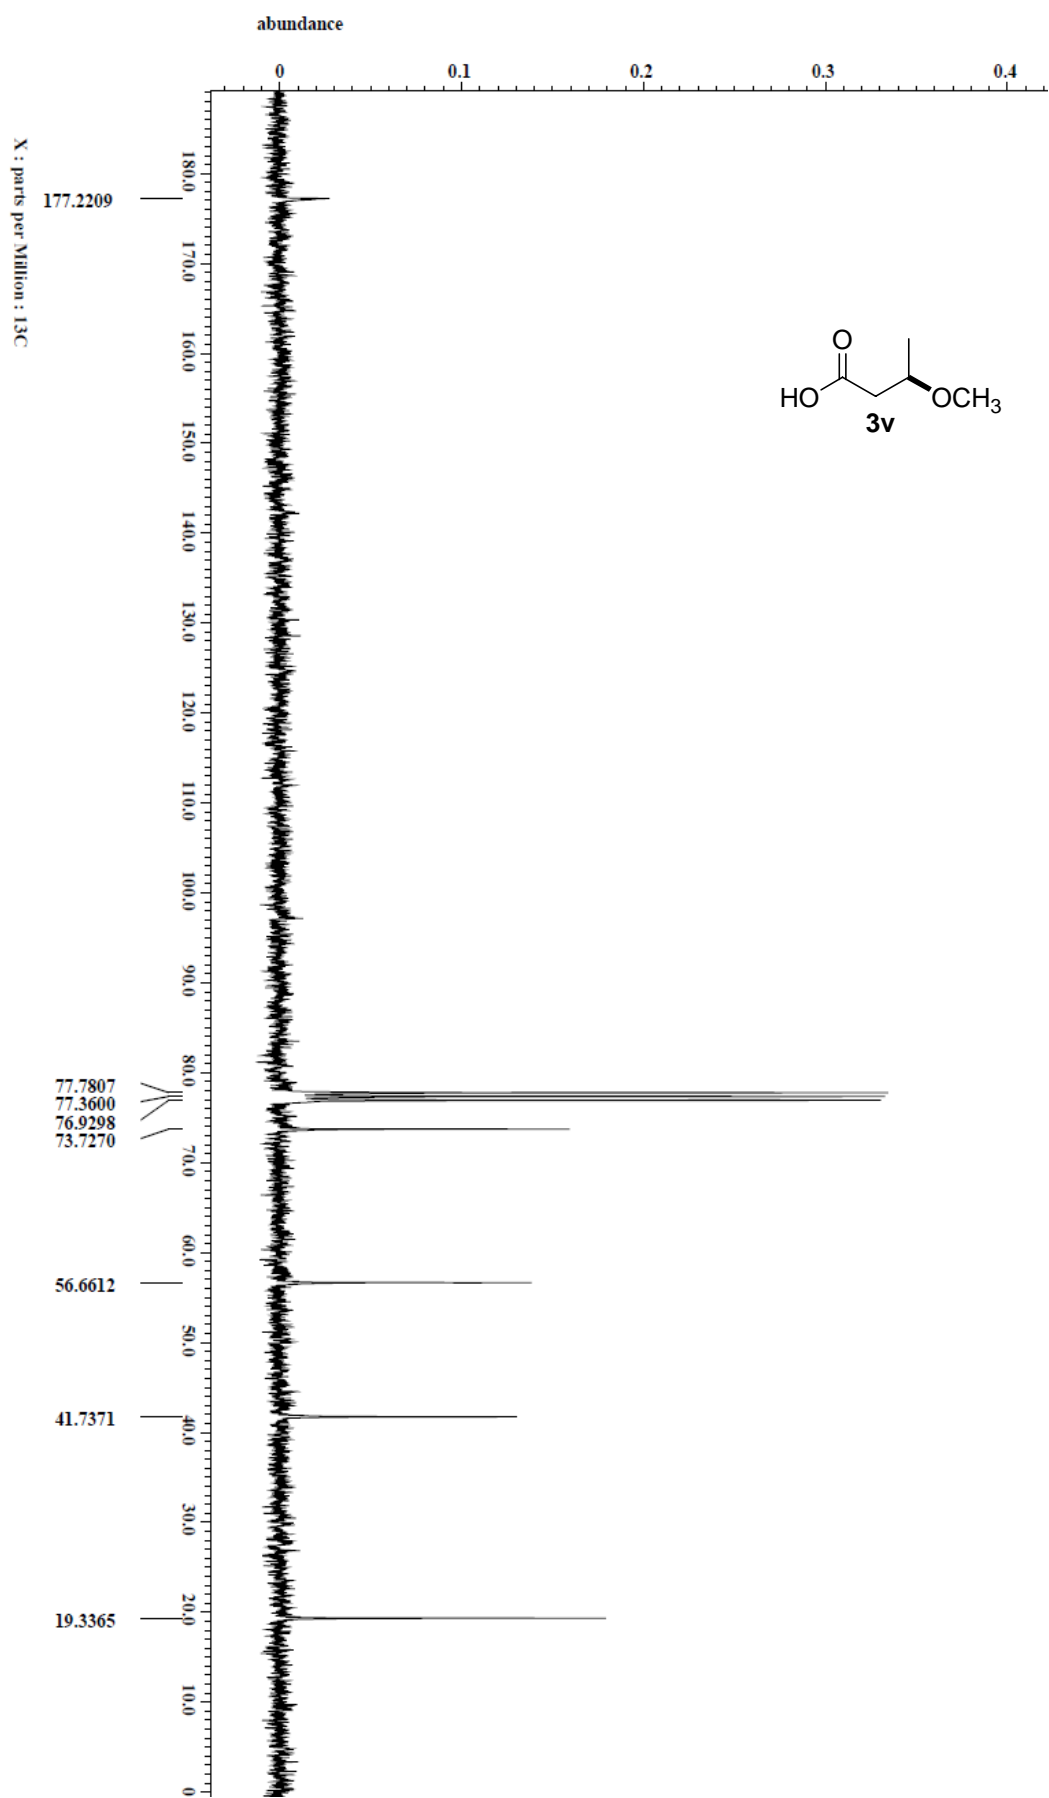

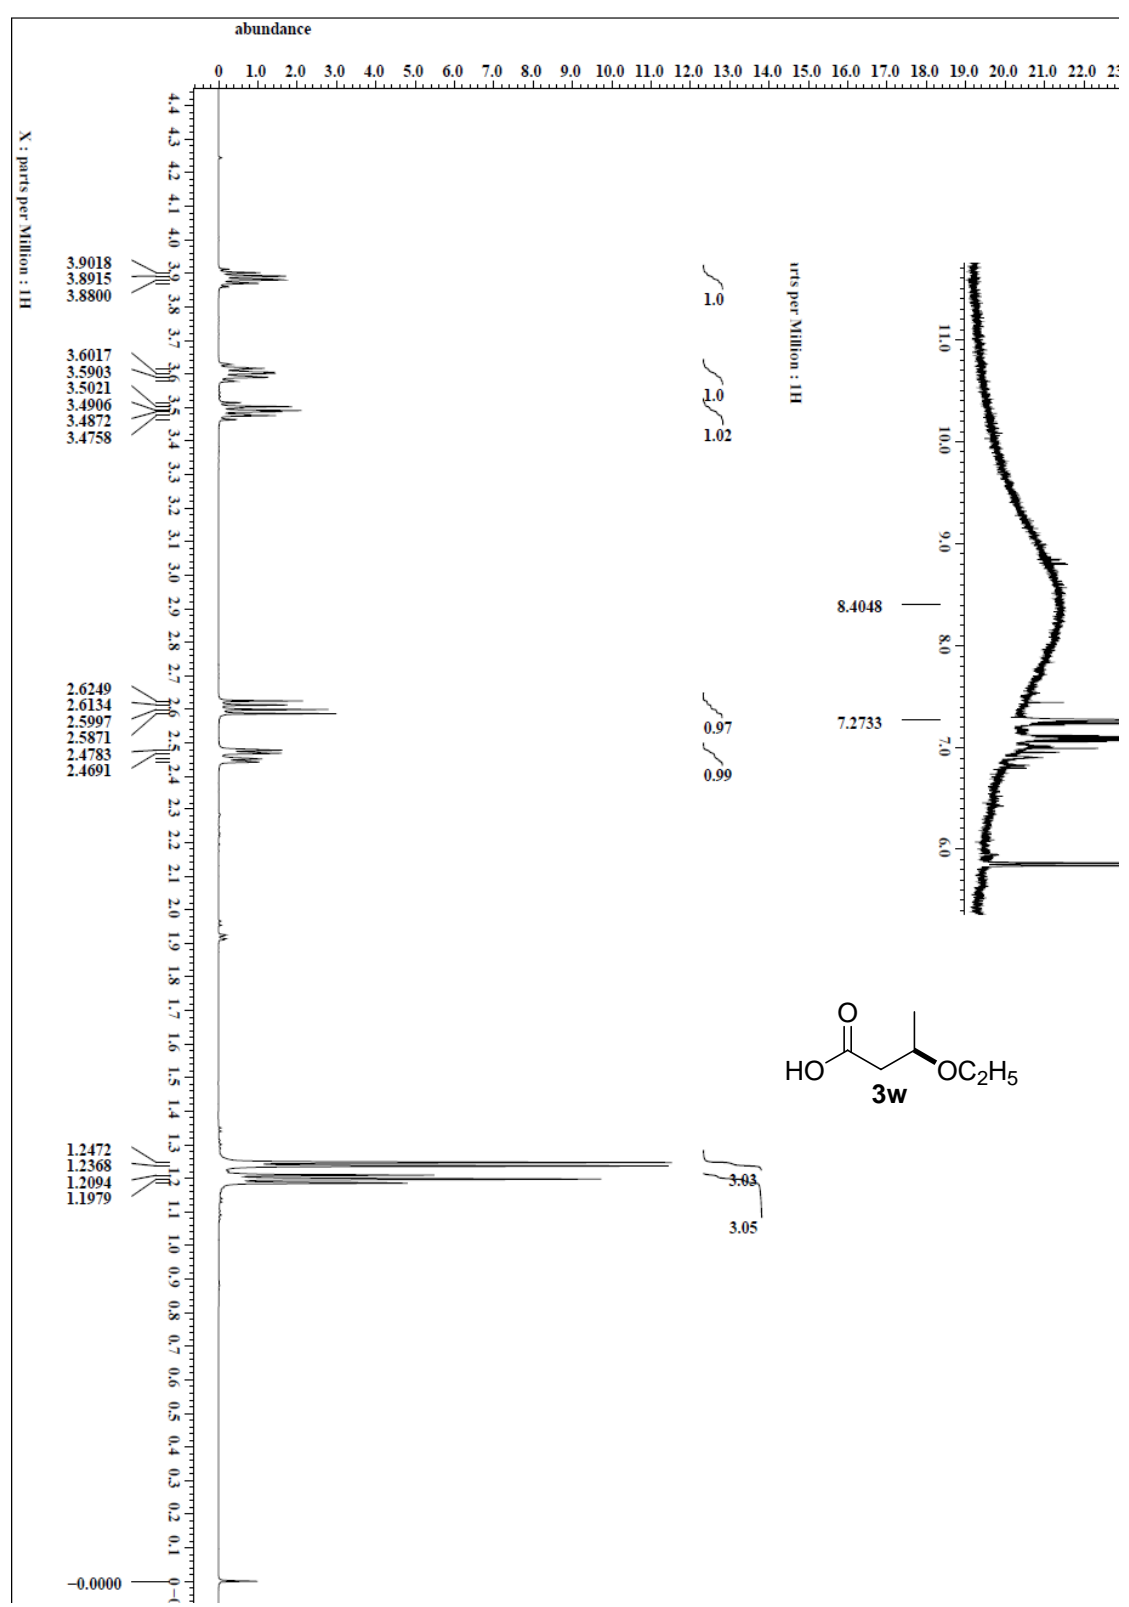

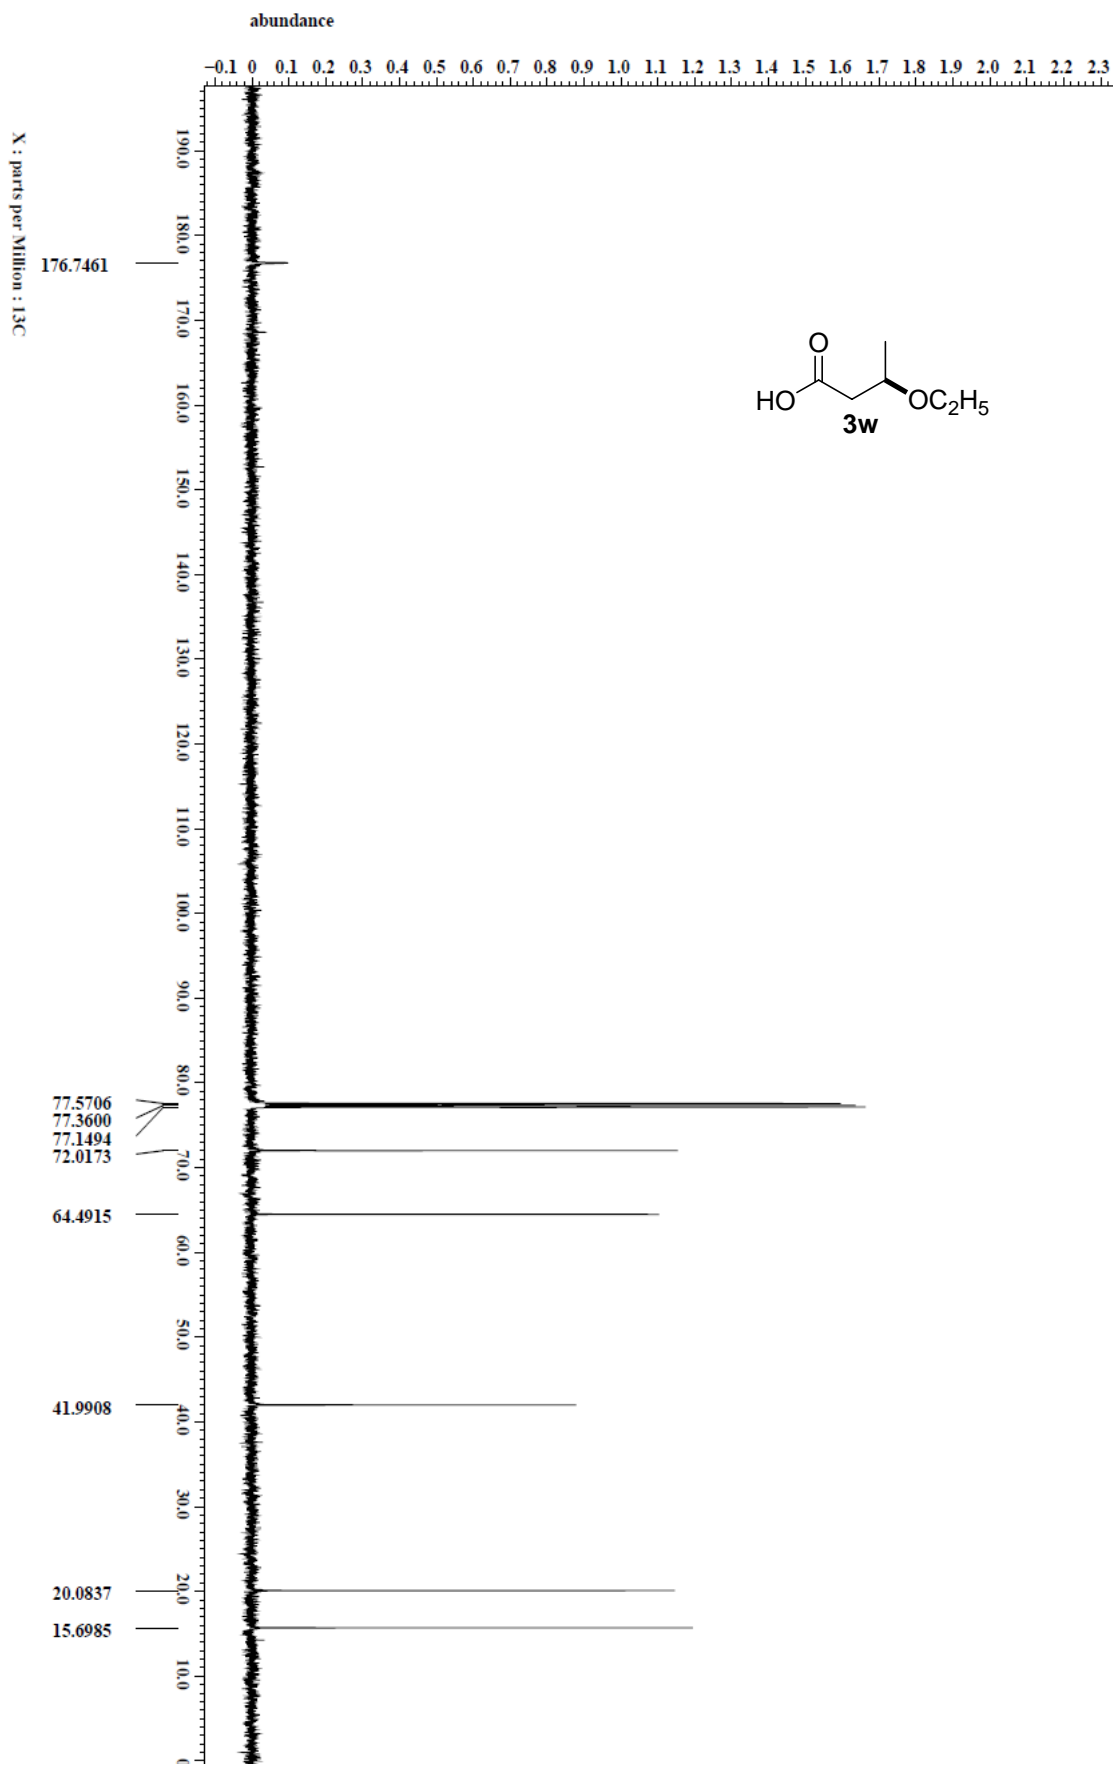



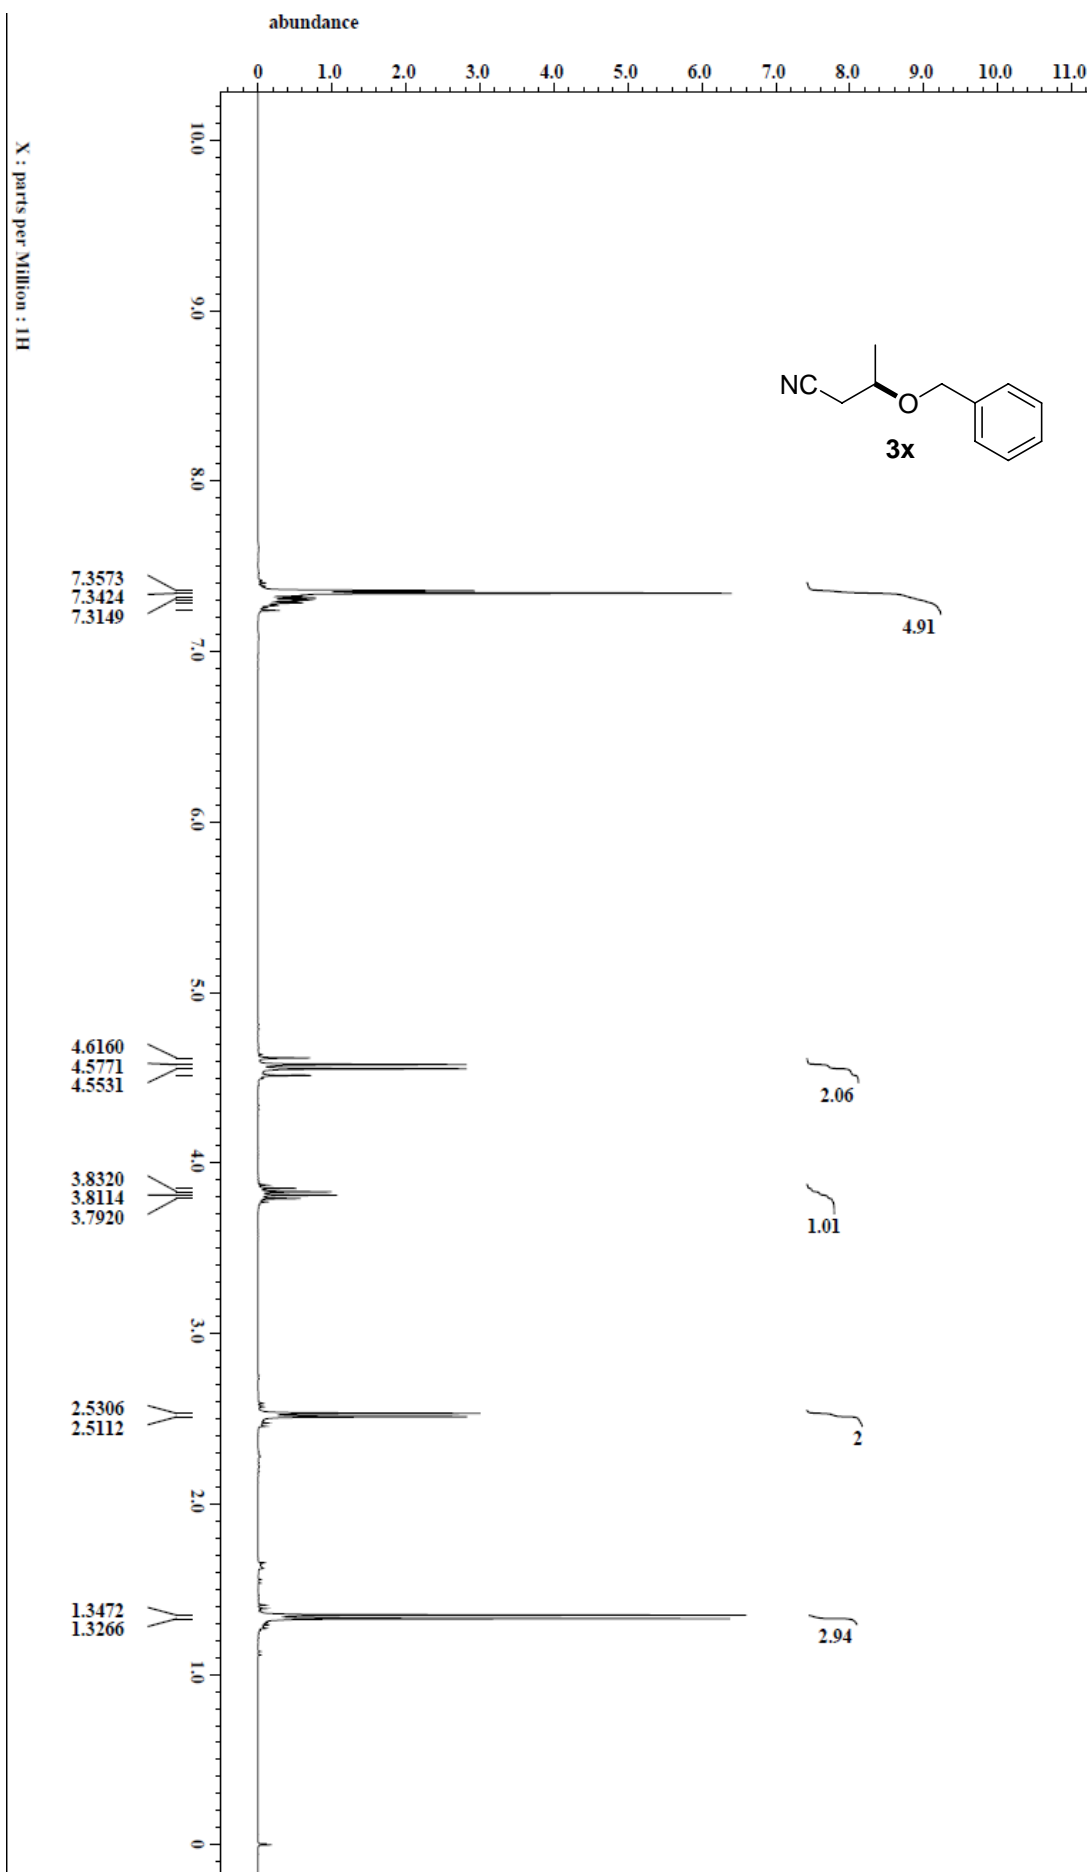

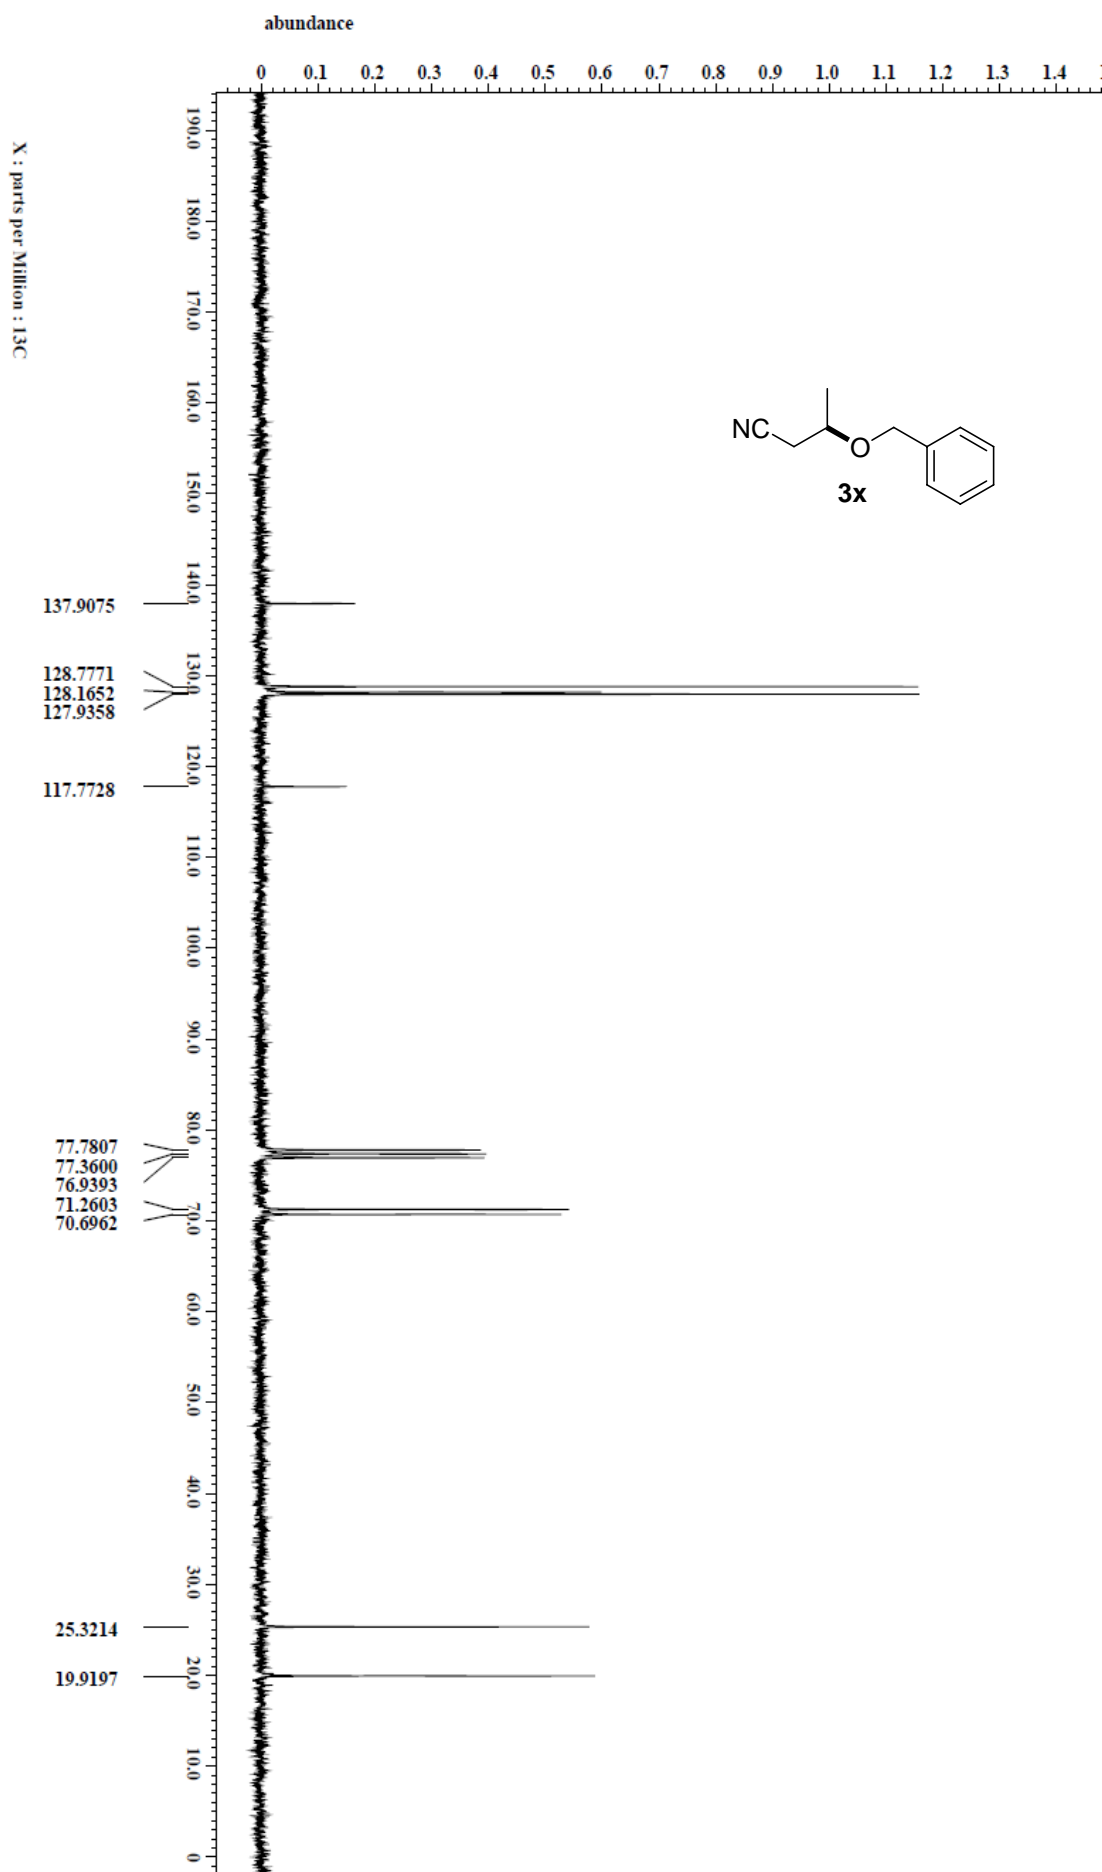

Supplement: c2cc37595h.pdf [file c2cc37595h.pdf]
